# Supplementary material
Source: PubMed Central journal article supplement (PMC529078)
Supplement: jbacter_186_23_7926__1.pdf [file jbacter_186_23_7926__1.pdf]

| <b>Salama et al. Supplemental Table 1</b>       |              |               |                  |                                                                                                                 |                                  |
|-------------------------------------------------|--------------|---------------|------------------|-----------------------------------------------------------------------------------------------------------------|----------------------------------|
| <b>Transposon Insertions Data for all Genes</b> |              |               |                  |                                                                                                                 |                                  |
| <b>Tn Hits</b>                                  | <b>TIGR#</b> | <b>ASTRA#</b> | <b>Gene Name</b> | <b>Gene Description</b>                                                                                         | <b>Process</b>                   |
| 1                                               | HP0001       | JHP0001       | nusB             | TRANSCRIPTION TERMINATION                                                                                       | DNA/RNA Synthesis and Processing |
| 3                                               | HP0002       | JHP0002       | ribE             | riboflavin synthase beta chain                                                                                  | Biosynthesis and Metabolism      |
| 2                                               | HP0003       | JHP0003       | kdsA             | 3-deoxy-d-manno-octulosonic acid 8-phosphate synthetase , 3-deoxy-D-manno-octulosonic acid 8-phosphate synthase | Cell Envelope                    |
| 5                                               | HP0004       | JHP0004       | icfA             | carbonic anhydrase                                                                                              | Biosynthesis and Metabolism      |
| 3                                               | HP0005       | JHP0005       | pyrF             | orotidine 5'-phosphate decarboxylase                                                                            | Biosynthesis and Metabolism      |
| 0                                               | HP0006       | JHP0006       | panC             | pantoate-beta-alanine ligase , PANTOATE--BETA-ALANINE LIGASE                                                    | Biosynthesis and Metabolism      |
| 0                                               | HP0007       | N/A           |                  |                                                                                                                 | Unknown Hypothetical             |
| 1                                               | HP0008       | N/A           |                  |                                                                                                                 | Unknown Hypothetical             |
| 6                                               | HP0009       | JHP0007       |                  | putative Outer membrane protein                                                                                 | Outer Membrane Protein           |
| 7                                               | HP0010       | JHP0008       | groEL            | chaperone and heat shock protein , 60kDa chaperone                                                              | Chaperones                       |
| 1                                               | HP0011       | JHP0009       | groES            | co-chaperone , 10kDa chaperone                                                                                  | Chaperones                       |
| 1                                               | HP0012       | JHP0010       | dnaG             | DNA primase                                                                                                     | DNA/RNA Synthesis and Processing |
| 4                                               | HP0013       | JHP0011       |                  |                                                                                                                 | Unknown Hypothetical             |
| 3                                               | HP0014       | JHP0012       |                  |                                                                                                                 | Unknown Hypothetical             |
| 5                                               | HP0015       | JHP0013       |                  |                                                                                                                 | Unknown Hypothetical             |
| 1                                               | HP0016       | JHP0014       |                  |                                                                                                                 | Unknown Hypothetical             |
| 8                                               | HP0017       | JHP0015       | virB4, virB4_1   | virB4 homolog , DNA transfer protein                                                                            | Other                            |
| 5                                               | HP0018       | JHP0016       |                  |                                                                                                                 | Unknown Hypothetical             |
| 1                                               | HP0019       | JHP0017       | cheV, cheV_1     | chemotaxis protein , putative chemotaxis protein                                                                | Motility                         |
| 10                                              | HP0020       | JHP0018       | nspC             | carboxynorspermidine decarboxylase , putative carboxynorspermidine decarboxylase                                | Biosynthesis and Metabolism      |
| 4                                               | HP0021       | JHP0019       |                  |                                                                                                                 | Unknown Hypothetical             |
| 5                                               | HP0022       | JHP0020       |                  | conserved hypothetical integral membrane protein                                                                | Conserve Hypothetical            |
| 1                                               | HP0023       | N/A           |                  |                                                                                                                 | Unknown Hypothetical             |
| 0                                               | HP0024       | N/A           |                  |                                                                                                                 | Unknown Hypothetical             |
| 2                                               | HP0025       | JHP0021       | omp2             | outer membrane protein , putative Outer membrane protein                                                        | Outer Membrane Protein           |
| 2                                               | HP0026       | JHP0022       | gltA             | citrate synthase                                                                                                | Biosynthesis and Metabolism      |

| Tn Hits | TIGR#  | ASTRA#  | Gene Name       | Gene Description                                                                                      | Process                          |
|---------|--------|---------|-----------------|-------------------------------------------------------------------------------------------------------|----------------------------------|
| 7       | HP0027 | JHP0023 | icd             | isocitrate dehydrogenase                                                                              | Biosynthesis and Metabolism      |
| 0       | HP0028 | JHP0024 |                 | conserved hypothetical secreted protein                                                               | Conserve Hypothetical            |
| 2       | HP0029 | JHP0025 | bioD            | dethiobiotin synthetase                                                                               | Biosynthesis and Metabolism      |
| 6       | HP0030 | JHP0026 |                 |                                                                                                       | Unknown Hypothetical             |
| 5       | HP0031 | JHP0027 |                 |                                                                                                       | Unknown Hypothetical             |
| 1       | HP0032 | JHP0028 |                 | conserved hypothetical protein                                                                        | Conserve Hypothetical            |
| 7       | HP0033 | JHP0029 | clpA            | ATP-dependent C1p protease , ATP-DEPENDENT PROTEASE,ATP-BINDING SUBUNIT                               | Protein Synthesis and Processing |
| 0       | HP0034 | JHP0030 | panD            | aspartate 1-decarboxylase                                                                             | Biosynthesis and Metabolism      |
| 0       | HP0035 | JHP0031 |                 | conserved hypothetical protein                                                                        | Conserve Hypothetical            |
| 1       | HP0036 | JHP0032 |                 |                                                                                                       | Unknown Hypothetical             |
| 3       | HP0037 | JHP0033 |                 | NADH-ubiquinone oxidoreductase subunit                                                                | Biosynthesis and Metabolism      |
| 4       | HP0038 | JHP0034 | comB1           | DNA transformation competency                                                                         | Competence                       |
| 6       | HP0039 | JHP0035 | comB2           | DNA transformation competency                                                                         | Competence                       |
| 9       | HP0040 | JHP0035 | comB2           | DNA transformation competency                                                                         | Competence                       |
| 1       | HP0041 | JHP0036 | comB3           | DNA transformation competency                                                                         | Competence                       |
| 1       | HP0042 | JHP0036 | comB3           | trbI protein, DNA transformation competency                                                           | Competence                       |
| 5       | HP0043 | JHP0037 | pmi, algA, manC | mannose-6-phosphate isomerase , phosphomannose isomerase/GDP-mannose pyrophosphorylase                | Biosynthesis and Metabolism      |
| 7       | HP0044 | JHP0038 | rfbD, gmd       | GDP-D-mannose dehydratase                                                                             | Cell Envelope                    |
| 7       | HP0045 | JHP0039 | nolK            | nodulation protein , putative SUGAR NUCLEOTIDE BIOSYNTHESIS                                           | Biosynthesis and Metabolism      |
| 6       | HP0047 | JHP0040 | hypE            | hydrogenase expression/formation protein                                                              | Biosynthesis and Metabolism      |
| 10      | HP0048 | JHP0041 | hypF            | transcriptional regulator , putative TRANSCRIPTIONAL REGULATOR                                        | DNA/RNA Synthesis and Processing |
| 6       | HP0049 | JHP0042 |                 |                                                                                                       | Competence                       |
| 7       | HP0050 | JHP0043 | dpnA            | adenine specific DNA methyltransferase , putative TYPE II DNA MODIFICATION ENZYME (METHYLTRANSFERASE) | Restiction Modification          |
| 7       | HP0051 | N/A     | DDEM            | cytosine specific DNA methyltransferase                                                               | Restiction Modification          |
| 2       | HP0052 | N/A     |                 |                                                                                                       | Unknown Hypothetical             |
| 6       | HP0053 | N/A     |                 |                                                                                                       | Unknown Hypothetical             |
| 17      | HP0054 | N/A     |                 | adenine/cytosine DNA methyltransferase                                                                | Restiction Modification          |
| 7       | HP0055 | JHP0047 | putP            | proline permease , sodium/proline symporter                                                           | Transporters                     |

| Tn Hits | TIGR#  | ASTRA#                  | Gene Name   | Gene Description                                                                             | Process                          |
|---------|--------|-------------------------|-------------|----------------------------------------------------------------------------------------------|----------------------------------|
| 7       | HP0056 | JHP0048                 | putA        | delta-1-pyrroline-5-carboxylate dehydrogenase, Proline/pyrroline-5-carboxylate dehydrogenase | Biosynthesis and Metabolism      |
| 3       | HP0057 | JHP0049                 |             |                                                                                              | Unknown Hypothetical             |
| 2       | HP0058 | JHP0050 JHP0051         |             |                                                                                              | Unknown Hypothetical             |
| 9       | HP0059 | JHP0052                 |             |                                                                                              | Unknown Hypothetical             |
| 6       | HP0060 | JHP0053 JHP0054 JHP0055 |             |                                                                                              | Unknown Hypothetical             |
| 0       | HP0061 | JHP0056                 |             |                                                                                              | Unknown Hypothetical             |
| 7       | HP0062 | JHP0057                 |             |                                                                                              | Unknown Hypothetical             |
| 10      | HP0063 | JHP0058                 |             |                                                                                              | Unknown Hypothetical             |
| 3       | HP0064 | JHP0059                 |             |                                                                                              | Unknown Hypothetical             |
| 0       | HP0065 | JHP0060                 |             |                                                                                              | Unknown Hypothetical             |
| 9       | HP0066 | JHP0061                 |             | conserved hypothetical ATP-binding protein                                                   | Conserve Hypothetical            |
| 5       | HP0067 | JHP0062                 | ureH        | urease accessory protein                                                                     | Biosynthesis and Metabolism      |
| 4       | HP0068 | JHP0063                 | ureG        | urease accessory protein                                                                     | Biosynthesis and Metabolism      |
| 1       | HP0069 | JHP0064                 | ureF        | urease accessory protein                                                                     | Biosynthesis and Metabolism      |
| 2       | HP0070 | JHP0065                 | ureE        | urease accessory protein                                                                     | Biosynthesis and Metabolism      |
| 3       | HP0071 | JHP0066                 | ureI        | urease accessory protein , urea transporter                                                  | Biosynthesis and Metabolism      |
| 6       | HP0072 | JHP0067                 | ureB        | urease beta subunit (urea amidohydrolase) , UREASE BETA SUBUNIT                              | Biosynthesis and Metabolism      |
| 7       | HP0073 | JHP0068                 | ureA        | urease alpha subunit (urea amidohydrolase), UREASE ALPHA SUBUNIT                             | Biosynthesis and Metabolism      |
| 8       | HP0074 | JHP0069                 | lspA        | lipoprotein signal peptidase                                                                 | Protein Synthesis and Processing |
| 0       | HP0075 | JHP0070                 | ureC, glmM  | urease protein , phosphoglucosamine mutase                                                   | Biosynthesis and Metabolism      |
| 0       | HP0076 | JHP0071                 | rps20, rpsT | ribosomal protein S20 , 30S RIBOSOMAL PROTEIN S20                                            | Protein Synthesis and Processing |
| 8       | HP0077 | JHP0072                 | prfA        | peptide chain release factor RF-1 , PEPTIDE CHAIN RELEASE FACTOR 1                           | Protein Synthesis and Processing |
| 1       | HP0078 | JHP0073                 |             | putative Outer membrane protein                                                              | Unknown Hypothetical             |
| 2       | HP0079 | JHP0073                 | omp3        | outer membrane protein                                                                       | Outer Membrane Protein           |
| 5       | HP0080 | JHP0074                 |             |                                                                                              | Unknown Hypothetical             |
| 13      | HP0082 | JHP0075                 | tlpC        | methyl-accepting chemotaxis transducer , methyl-accepting chemotaxis protein (MCP)           | Signaling                        |
| 3       | HP0083 | JHP0076                 | rps9, rpsI  | ribosomal protein S9 , 30S RIBOSOMAL PROTEIN S9                                              | Protein Synthesis and Processing |
| 0       | HP0084 | JHP0077                 | rpl13, rplM | ribosomal protein L13 , 50S RIBOSOMAL PROTEIN L13                                            | Protein Synthesis and Processing |
| 2       | HP0085 | JHP0078                 |             |                                                                                              | Unknown Hypothetical             |

| Tn Hits | TIGR#  | ASTRA#  | Gene Name | Gene Description                                                                                     | Process                          |
|---------|--------|---------|-----------|------------------------------------------------------------------------------------------------------|----------------------------------|
| 8       | HP0086 | JHP0079 |           | conserved hypothetical protein                                                                       | Conserve Hypothetical            |
| 5       | HP0087 | JHP0080 |           |                                                                                                      | Unknown Hypothetical             |
| 5       | HP0088 | JHP0081 | rpoD      | RNA polymerase sigma-70 factor , RNA POLYMERASE SIGMA FACTOR (SIGMA-70)                              | DNA/RNA Synthesis and Processing |
| 4       | HP0089 | JHP0082 | pfs       | pfs protein                                                                                          | Other                            |
| 3       | HP0090 | JHP0083 | fabD      | malonyl coenzyme A-acyl carrier protein transacylase , MALONYL COA-ACYL CARRIER PROTEIN TRANSACYLASE | Biosynthesis and Metabolism      |
| 1       | HP0091 | JHP0084 | hsdR      | type II restriction enzyme R protein                                                                 | Restiction Modification          |
| 0       | HP0092 | JHP0085 | hsdM      | type II restriction enzyme M protein , TYPE II DNA MODIFICATION ENZYME (METHYLTRANSFERASE)           | Restiction Modification          |
| 1       | HP0093 | JHP0086 |           | putative ALPHA(1,2)FUCOSYLTRANSFERASE                                                                | Cell Envelope                    |
| 2       | HP0094 | JHP0086 |           | conserved hypothetical protein                                                                       | Conserve Hypothetical            |
| 0       | HP0095 | JHP0087 |           |                                                                                                      | Unknown Hypothetical             |
| 6       | HP0096 | JHP0088 |           | phosphoglycerate dehydrogenase, putative keto-acid dehydrogenase                                     | Biosynthesis and Metabolism      |
| 2       | HP0097 | JHP0089 |           |                                                                                                      | Unknown Hypothetical             |
| 1       | HP0098 | JHP0090 | thrC      | threonine synthase                                                                                   | Biosynthesis and Metabolism      |
| 3       | HP0099 | JHP0091 | tlpA      | methyl-accepting chemotaxis protein , methyl-accepting chemotaxis protein (MCP)                      | Signaling                        |
| 5       | HP0100 | JHP0092 |           | conserved hypothetical protein                                                                       | Conserve Hypothetical            |
| 7       | HP0101 | JHP0093 |           |                                                                                                      | Unknown Hypothetical             |
| 4       | HP0102 | JHP0094 |           | conserved hypothetical protein                                                                       | Conserve Hypothetical            |
| 5       | HP0103 | JHP0095 | tlpB      | methyl-accepting chemotaxis protein , methyl-accepting chemotaxis protein (MCP)                      | Signaling                        |
| 3       | HP0104 | JHP0096 | cpdB      | 2',3'-cyclic-nucleotide 2'-phosphodiesterase                                                         | Biosynthesis and Metabolism      |
| 1       | HP0105 | JHP0097 |           | conserved hypothetical protein                                                                       | Conserve Hypothetical            |
| 7       | HP0106 | JHP0098 | metB      | cystathionine gamma-synthase , putative CYSTATHIONINE GAMMA-SYNTHASE                                 | Biosynthesis and Metabolism      |
| 2       | HP0107 | JHP0099 | cysK      | cysteine synthetase , CYSTEINE SYNTHASE                                                              | Biosynthesis and Metabolism      |
| 0       | HP0109 | JHP0101 | dnaK      | chaperone and heat shock protein 70 , 70kDa chaperone                                                | Chaperones                       |
| 0       | HP0110 | JHP0102 | grpE      | co-chaperone and heat shock protein , 24kDa chaperone                                                | Chaperones                       |
| 1       | HP0111 | JHP0103 |           |                                                                                                      | Unknown Hypothetical             |
| 2       | HP0112 | JHP0104 |           |                                                                                                      | Unknown Hypothetical             |
| 2       | HP0113 | JHP0105 |           |                                                                                                      | Unknown Hypothetical             |
| 4       | HP0114 | JHP0106 |           |                                                                                                      | Unknown Hypothetical             |
| 6       | HP0115 | JHP0107 | flaB      | flagellin B                                                                                          | Motility                         |

| Tn Hits | TIGR#  | ASTRA#  | Gene Name       | Gene Description                                                                                         | Process                          |
|---------|--------|---------|-----------------|----------------------------------------------------------------------------------------------------------|----------------------------------|
| 3       | HP0116 | JHP0108 | topA,<br>topA_1 | DNA topoisomerase I                                                                                      | DNA/RNA Synthesis and Processing |
| 6       | HP0117 | JHP0109 |                 | conserved hypothetical protein                                                                           | Conserve Hypothetical            |
| 5       | HP0118 | JHP0110 |                 |                                                                                                          | Unknown Hypothetical             |
| 7       | HP0119 | N/A     |                 |                                                                                                          | Unknown Hypothetical             |
| 2       | HP0120 | N/A     |                 |                                                                                                          | Unknown Hypothetical             |
| 1       | HP0121 | JHP0111 | ppsA            | phosphoenolpyruvate synthase                                                                             | Biosynthesis and Metabolism      |
| 0       | HP0122 | JHP0112 |                 |                                                                                                          | Unknown Hypothetical             |
| 0       | HP0123 | JHP0113 | thrS            | threonyl-tRNA synthetase                                                                                 | Protein Synthesis and Processing |
| 0       | HP0124 | JHP0114 | infC            | translation initiation factor IF-3                                                                       | Protein Synthesis and Processing |
| 0       | HP0125 | JHP0115 | rpl35,<br>rpml  | ribosomal protein L35 , 50S RIBOSOMAL PROTEIN L35                                                        | Protein Synthesis and Processing |
| 0       | HP0126 | JHP0116 | rpl20,<br>rplT  | ribosomal protein L20 , 50S RIBOSOMAL PROTEIN L20                                                        | Protein Synthesis and Processing |
| 4       | HP0127 | JHP0117 | omp4            | outer membrane protein , putative Outer membrane protein                                                 | Outer Membrane Protein           |
| 1       | HP0128 | N/A     |                 |                                                                                                          | Unknown Hypothetical             |
| 2       | HP0129 | JHP0118 |                 |                                                                                                          | Unknown Hypothetical             |
| 3       | HP0130 | JHP0119 |                 |                                                                                                          | Unknown Hypothetical             |
| 4       | HP0131 | N/A     |                 |                                                                                                          | Unknown Hypothetical             |
| 7       | HP0132 | JHP0120 | sdaA,<br>sdaB   | L-serine deaminase , L-SERINE/L-THREONINEDEAMINASE                                                       | Biosynthesis and Metabolism      |
| 5       | HP0133 | JHP0121 | sdaC            | serine transporter , L-serine transporter, similar to E. coli nhaB                                       | Transporters                     |
| 2       | HP0134 | JHP0122 | dhs1,<br>aroF   | 3-deoxy-D-arabino-heptulosonate 7-phosphate synthase , PHOSPHO-2-DEHYDRO-3-DEOXYHEPTONATE ALDOLASE       | Biosynthesis and Metabolism      |
| 1       | HP0135 | JHP0123 |                 |                                                                                                          | Unknown Hypothetical             |
| 3       | HP0136 | JHP0124 | bcp             | bacterioferritin comigratory protein                                                                     | Unknown Hypothetical             |
| 4       | HP0137 | JHP0125 |                 |                                                                                                          | Unknown Hypothetical             |
| 1       | HP0138 | JHP0126 |                 | conserved hypothetical iron-sulfur protein                                                               | Conserve Hypothetical            |
| 2       | HP0139 | JHP0127 |                 | conserved hypothetical secreted protein                                                                  | Conserve Hypothetical            |
| 14      | HP0140 | JHP0128 | lctP,<br>lldP_1 | L-lactate permease                                                                                       | Transporters                     |
| 4       | HP0141 | JHP0129 | lctP,<br>lldP_2 | L-lactate permease                                                                                       | Transporters                     |
| 2       | HP0142 | JHP0130 | mutY            | A/G-specific adenine glycosylase                                                                         | DNA/RNA Synthesis and Processing |
| 3       | HP0143 | JHP0131 |                 |                                                                                                          | Transporters                     |
| 5       | HP0144 | JHP0132 | fixN            | cytochrome c oxidase, heme b and copper-binding subunit, membrane-bound , Cytochrome oxidase (CBB3-TYPE) | Biosynthesis and Metabolism      |

| Tn Hits | TIGR#  | ASTRA#  | Gene Name  | Gene Description                                                                              | Process                          |
|---------|--------|---------|------------|-----------------------------------------------------------------------------------------------|----------------------------------|
| 4       | HP0145 | JHP0133 | fixO       | cytochrome c oxidase, monoheme subunit, membrane-bound , Cytochrome oxidase (CBB3-TYPE)       | Biosynthesis and Metabolism      |
| 0       | HP0146 | JHP0134 | CcoQ, fixQ | cbb3-type cytochrome c oxidase subunit Q , putative Cytochrome oxidase (CBB3-TYPE)            | Biosynthesis and Metabolism      |
| 0       | HP0147 | JHP0135 | fixP       | cytochrome c oxidase, diheme subunit, membrane-bound , Cytochrome oxidase (CBB3-TYPE)         | Biosynthesis and Metabolism      |
| 0       | HP0148 | JHP0136 |            |                                                                                               | Unknown Hypothetical             |
| 2       | HP0149 | JHP0137 |            |                                                                                               | Unknown Hypothetical             |
| 2       | HP0150 | JHP0138 |            |                                                                                               | Unknown Hypothetical             |
| 16      | HP0151 | JHP0139 |            | conserved hypothetical membrane protein                                                       | Conserve Hypothetical            |
| 1       | HP0152 | JHP0140 |            |                                                                                               | Unknown Hypothetical             |
| 0       | HP0153 | JHP0141 | recA       | recombinase , RECA PROTEIN.                                                                   | DNA/RNA Synthesis and Processing |
| 1       | HP0154 | JHP0142 | eno        | enolase                                                                                       | Biosynthesis and Metabolism      |
| 4       | HP0155 | JHP0143 |            |                                                                                               | Unknown Hypothetical             |
| 5       | HP0156 | JHP0144 |            |                                                                                               | Unknown Hypothetical             |
| 0       | HP0157 | JHP0145 | aroK       | shikimic acid kinase I , SHIKIMATE KINASE I                                                   | Biosynthesis and Metabolism      |
| 2       | HP0158 | JHP0146 |            |                                                                                               | Unknown Hypothetical             |
| 7       | HP0159 | JHP0147 | rfaJ       | lipopolysaccharide 1,2-glucosyltransferase , putative lipopolysaccharide biosynthesis protein | Cell Envelope                    |
| 8       | HP0160 | JHP0148 |            | conserved hypothetical secreted protein                                                       | Conserve Hypothetical            |
| 15      | HP0161 | N/A     |            |                                                                                               | Unknown Hypothetical             |
| 12      | HP0162 | JHP0149 |            | conserved hypothetical protein                                                                | Conserve Hypothetical            |
| 6       | HP0163 | JHP0150 | hemB       | delta-aminolevulinic acid dehydratase                                                         | Biosynthesis and Metabolism      |
| 0       | HP0164 | JHP0151 |            | signal-transducing protein, histidine kinase                                                  | Regulation                       |
| 1       | HP0165 | JHP0151 |            | putative histidine kinase sensor protein                                                      | Unknown Hypothetical             |
| 3       | HP0166 | JHP0152 | ompR       | response regulator , putative TRANSCRIPTIONAL REGULATOR                                       | DNA/RNA Synthesis and Processing |
| 4       | HP0167 | JHP0153 |            |                                                                                               | Unknown Hypothetical             |
| 1       | HP0168 | JHP0154 |            |                                                                                               | Unknown Hypothetical             |
| 5       | HP0169 | JHP0155 | prtC       | collagenase , putative PROTEASE                                                               | Protein Synthesis and Processing |
| 8       | HP0170 | JHP0156 |            |                                                                                               | Unknown Hypothetical             |
| 4       | HP0171 | JHP0157 | prfB       | peptide chain release factor RF-2 , PEPTIDE CHAIN RELEASE FACTOR 2 (RF-2)                     | Protein Synthesis and Processing |
| 6       | HP0172 | JHP0158 | moeA       | molybdopterin biosynthesis protein                                                            | Biosynthesis and Metabolism      |
| 2       | HP0173 | JHP0159 | fliR       | flagellar biosynthetic protein , FLAGELLAR BIOSYNTHESIS PROTEIN                               | Motility                         |
| 7       | HP0174 | JHP0160 |            |                                                                                               | Unknown Hypothetical             |

| Tn Hits | TIGR#  | ASTRA#  | Gene Name   | Gene Description                                                                               | Process                          |
|---------|--------|---------|-------------|------------------------------------------------------------------------------------------------|----------------------------------|
| 0       | HP0175 | JHP0161 |             | cell binding factor 2, putative PEPTIDYL-PROLYL CIS-TRANS ISOMERASE                            | Outer Membrane Protein           |
| 1       | HP0176 | JHP0162 | tsr, fba    | fructose-bisphosphate aldolase                                                                 | Biosynthesis and Metabolism      |
| 2       | HP0177 | JHP0163 | efp         | translation elongation factor EF-P , ELONGATION FACTOR P (EF-P)                                | Protein Synthesis and Processing |
| 4       | HP0178 | JHP0166 | neuB        | spore coat polysaccharide biosynthesis protein E, sialic acid synthase                         | Cell Envelope                    |
| 3       | HP0179 | JHP0167 |             | ABC transporter, ATP-binding protein                                                           | Transporters                     |
| 1       | HP0180 | JHP0168 | cute, lnt   | apolipoprotein N-acyltransferase                                                               | Outer Membrane Protein           |
| 12      | HP0181 | JHP0169 |             |                                                                                                | Unknown Hypothetical             |
| 0       | HP0182 | JHP0170 | lysS        | lysyl-tRNA synthetase                                                                          | Protein Synthesis and Processing |
| 1       | HP0183 | JHP0171 | glyA        | serine hydroxymethyltransferase                                                                | Biosynthesis and Metabolism      |
| 9       | HP0184 | JHP0172 |             |                                                                                                | Unknown Hypothetical             |
| 1       | HP0185 | JHP0173 |             |                                                                                                | Unknown Hypothetical             |
| 4       | HP0186 | JHP0174 |             |                                                                                                | Unknown Hypothetical             |
| 3       | HP0187 | JHP0174 |             |                                                                                                | Unknown Hypothetical             |
| 0       | HP0188 | JHP0174 |             |                                                                                                | Unknown Hypothetical             |
| 2       | HP0189 | JHP0175 |             | conserved hypothetical integral membrane protein                                               | Conserve Hypothetical            |
| 0       | HP0190 | JHP0176 |             | conserved hypothetical secreted protein, putative cardiolipin synthase                         | Conserve Hypothetical            |
| 1       | HP0191 | JHP0177 | frdB        | fumarate reductase, iron-sulfur subunit , Fumarate reductase                                   | Biosynthesis and Metabolism      |
| 5       | HP0192 | JHP0178 | frdA        | fumarate reductase, flavoprotein subunit , Fumarate reductase                                  | Biosynthesis and Metabolism      |
| 8       | HP0193 | JHP0179 | frdC        | fumarate reductase, cytochrome b subunit , Fumarate reductase                                  | Biosynthesis and Metabolism      |
| 2       | HP0194 | JHP0180 | tpi         | triosephosphate isomerase , TRIOSE PHOPHATE ISOMERASE                                          | Biosynthesis and Metabolism      |
| 7       | HP0195 | JHP0181 | fabI        | enoyl-(acyl-carrier-protein) reductase (NADH) , ENOYL-ACYL CARRIER PROTEIN REDUCTASE           | Biosynthesis and Metabolism      |
| 0       | HP0196 | JHP0182 | lpxD        | UDP-3-O-(3-hydroxymyristoyl) glucosamine N-acyltransferase , UDP-3-O-[3-hydroxymyristoyl       | Cell Envelope                    |
| 0       | HP0197 | JHP0183 | metX, metK  | S-adenosylmethionine synthetase 2 , S-adenosylmethionine synthetase                            | Biosynthesis and Metabolism      |
| 1       | HP0198 | JHP0184 | ndk         | nucleoside diphosphate kinase                                                                  | Biosynthesis and Metabolism      |
| 4       | HP0199 | JHP0185 |             |                                                                                                | Unknown Hypothetical             |
| 0       | HP0200 | JHP0186 | rpl32, rpmF | ribosomal protein L32 , 50S RIBOSOMAL PROTEIN L32                                              | Protein Synthesis and Processing |
| 0       | HP0201 | JHP0187 | plsX        | fatty acid/phospholipid synthesis protein , putative FATTY ACID/PHOSPHOLIPID SYNTHESIS PROTEIN | Biosynthesis and Metabolism      |

| Tn Hits | TIGR#  | ASTRA#  | Gene Name  | Gene Description                                                                                         | Process                          |
|---------|--------|---------|------------|----------------------------------------------------------------------------------------------------------|----------------------------------|
| 1       | HP0202 | JHP0188 | fabH       | beta-ketoacyl-acyl carrier protein synthase III , BETA-KETOACYL-ACP SYNTHASE III                         | Biosynthesis and Metabolism      |
| 1       | HP0203 | JHP0189 |            |                                                                                                          | Unknown Hypothetical             |
| 6       | HP0204 | JHP0190 |            |                                                                                                          | Unknown Hypothetical             |
| 7       | HP0205 | JHP0191 |            |                                                                                                          | Unknown Hypothetical             |
| 1       | HP0206 | JHP0192 |            |                                                                                                          | Unknown Hypothetical             |
| 3       | HP0207 | JHP0193 | mpr        | ATP-binding protein                                                                                      | Unknown Hypothetical             |
| 1       | HP0208 | JHP0194 |            | putative lipopolysaccharide biosynthesis protein                                                         | Cell Envelope                    |
| 1       | HP0209 | JHP0195 |            | putative Outer membrane protein                                                                          | Unknown Hypothetical             |
| 7       | HP0210 | JHP0196 | htpG       | chaperone and heat shock protein C62.5 , 90kDa chaperone                                                 | Chaperones                       |
| 3       | HP0211 | JHP0197 |            | conserved hypothetical secreted protein                                                                  | Conserve Hypothetical            |
| 6       | HP0212 | JHP0198 | dapE       | succinyl-diaminopimelate desuccinylase                                                                   | Biosynthesis and Metabolism      |
| 4       | HP0213 | JHP0199 | gidA       | glucose inhibited division protein , GLUCOSE INHIBITED DIVISION PROTEIN A                                | DNA/RNA Synthesis and Processing |
| 4       | HP0214 | JHP0200 | huNaD C-1  | sodium-dependent transporter , putative transporter                                                      | Transporters                     |
| 3       | HP0215 | JHP0201 | cdsA       | CDP-diglyceride synthetase , CDP-DIACYLGLYCEROL SYNTHASE                                                 | Biosynthesis and Metabolism      |
| 4       | HP0216 | JHP0202 |            | conserved hypothetical protein                                                                           | Conserve Hypothetical            |
| 0       | HP0218 | JHP0204 |            |                                                                                                          | Unknown Hypothetical             |
| 2       | HP0219 | JHP0205 |            |                                                                                                          | Unknown Hypothetical             |
| 2       | HP0220 | JHP0206 | nifS       | synthesis of [Fe-S] cluster , putative AMINOTRANSFERASE                                                  | Biosynthesis and Metabolism      |
| 0       | HP0221 | JHP0207 |            | nifU-like protein                                                                                        | Unknown Hypothetical             |
| 0       | HP0222 | JHP0208 |            |                                                                                                          | Unknown Hypothetical             |
| 5       | HP0223 | JHP0209 | sms, radA  | ATP-dependent protease , DNA REPAIR PROTEIN                                                              | Protein Synthesis and Processing |
| 4       | HP0224 | JHP0210 | msrA       | peptide methionine sulfoxide reductase , putative PEPTIDE METHIONINE SULFOXIDE REDUCTASE                 | Regulation                       |
| 2       | HP0225 | N/A     |            |                                                                                                          | Unknown Hypothetical             |
| 0       | HP0226 | JHP0211 |            | conserved hypothetical integral membrane protein                                                         | Conserve Hypothetical            |
| 11      | HP0227 | JHP0212 | omp5       | outer membrane protein , putative Outer membrane protein                                                 | Outer Membrane Protein           |
| 10      | HP0228 | JHP0213 |            | conserved hypothetical integral membrane protein                                                         | Conserve Hypothetical            |
| 6       | HP0229 | JHP0214 | omp6, hopA | outer membrane protein , Outer membrane protein/porin                                                    | Outer Membrane Protein           |
| 5       | HP0230 | JHP0215 | kdsB       | CTP:CMP-3-deoxy-D-manno-octulosonate-cytidyl-transferase , 3-DEOXY-MANNO-OCTULOSONATE CYTIDYLTRANSFERASE | Cell Envelope                    |
| 1       | HP0231 | JHP0216 |            |                                                                                                          | Unknown Hypothetical             |



| Tn Hits | TIGR#  | ASTRA#  | Gene Name | Gene Description                                                                         | Process                          |
|---------|--------|---------|-----------|------------------------------------------------------------------------------------------|----------------------------------|
| 3       | HP0232 | JHP0217 |           | secreted protein involved in flagellar motility, motility protein                        | Motility                         |
| 3       | HP0233 | JHP0218 |           | conserved hypothetical protein                                                           | Conserve Hypothetical            |
| 4       | HP0234 | JHP0219 |           | conserved hypothetical integral membrane protein                                         | Conserve Hypothetical            |
| 7       | HP0235 | JHP0220 |           | conserved hypothetical secreted protein                                                  | Conserve Hypothetical            |
| 1       | HP0236 | JHP0221 |           |                                                                                          | Unknown Hypothetical             |
| 0       | HP0237 | JHP0222 | hemC      | porphobilinogen deaminase                                                                | Biosynthesis and Metabolism      |
| 10      | HP0238 | JHP0223 | proS      | prolyl-tRNA synthetase                                                                   | Protein Synthesis and Processing |
| 2       | HP0239 | JHP0224 | hemA      | glutamyl-tRNA reductase , GLUTAMYL TRNA REDUCTASE                                        | Biosynthesis and Metabolism      |
| 0       | HP0240 | JHP0225 | ispB      | octaprenyl-diphosphate synthase , putative OCTAPRENYL-DIPHOSPHATE SYNTHASE               | Biosynthesis and Metabolism      |
| 1       | HP0241 | JHP0226 |           |                                                                                          | Unknown Hypothetical             |
| 0       | HP0242 | JHP0227 |           |                                                                                          | Unknown Hypothetical             |
| 2       | HP0243 | JHP0228 | napA      | neutrophil activating protein (bacterioferritin), NEUTROPHIL-ACTIVATING PROTEIN A        | Detoxification                   |
| 12      | HP0244 | JHP0229 | atoS      | signal-transducing protein, histidine kinase , putative histidine kinase sensor protein  | Regulation                       |
| 2       | HP0245 | JHP0230 |           |                                                                                          | Unknown Hypothetical             |
| 2       | HP0246 | JHP0231 | flgl      | flagellar basal-body P-ring protein , FLAGELLAR P-RING PROTEIN                           | Motility                         |
| 8       | HP0247 | JHP0232 | deaD      | ATP-dependent RNA helicase, DEAD-box family , ATP-DEPENDENT RNA HELICASE DEAD            | Protein Synthesis and Processing |
| 1       | HP0248 | JHP0233 |           | conserved hypothetical protein                                                           | Conserve Hypothetical            |
| 3       | HP0249 | JHP0234 |           |                                                                                          | Unknown Hypothetical             |
| 6       | HP0250 | JHP0235 | oppD      | oligopeptide ABC transporter, ATP-binding protein , ABC transporter, ATP-binding protein | Transporters                     |
| 5       | HP0251 | JHP0236 | oppC      | oligopeptide ABC transporter, permease protein , ABC transporter, permease               | Transporters                     |
| 3       | HP0253 | JHP0238 |           | putative Outer membrane protein                                                          | Unknown Hypothetical             |
| 15      | HP0254 | JHP0238 | omp8      | outer membrane protein                                                                   | Outer Membrane Protein           |
| 13      | HP0255 | JHP0239 | purA      | adenylosuccinate synthetase                                                              | Biosynthesis and Metabolism      |
| 2       | HP0256 | JHP0240 |           |                                                                                          | Unknown Hypothetical             |
| 5       | HP0257 | JHP0241 |           | conserved hypothetical secreted protein                                                  | Conserve Hypothetical            |
| 15      | HP0258 | JHP0242 |           | conserved hypothetical integral membrane protein                                         | Conserve Hypothetical            |
| 2       | HP0259 | JHP0243 | xseA      | exonuclease VII, large subunit , EXODEOXYRIBONUCLEASE LARGE SUBUNIT                      | DNA/RNA Synthesis and Processing |

| Tn Hits | TIGR#  | ASTRA#          | Gene Name       | Gene Description                                                                                     | Process                          |
|---------|--------|-----------------|-----------------|------------------------------------------------------------------------------------------------------|----------------------------------|
| 3       | HP0260 | JHP0244         | mod             | adenine specific DNA methyltransferase , TYPE II DNA MODIFICATION ENZYME (METHYLTRANSFERASE)         | Restiction Modification          |
| 3       | HP0261 | JHP0245         |                 |                                                                                                      | Unknown Hypothetical             |
| 3       | HP0262 | JHP0246 JHP0247 |                 |                                                                                                      | Unknown Hypothetical             |
| 5       | HP0263 | JHP0248         | hpaim           | adenine specific DNA methyltransferase , TYPE II DNA MODIFICATION ENZYME (METHYLTRANSFERASE)         | Restiction Modification          |
| 4       | HP0264 | JHP0249         | clpB            | ATP-dependent protease binding subunit , HEAT SHOCK PROTEIN                                          | Protein Synthesis and Processing |
| 0       | HP0265 | JHP0250         | ccdA            | cytochrome c biogenesis protein , putative CYTOCHROME C-TYPE BIOGENESIS PROTEIN                      | Biosynthesis and Metabolism      |
| 2       | HP0266 | JHP0251         | pyrC,<br>pyrC_1 | dihydroorotase                                                                                       | Biosynthesis and Metabolism      |
| 3       | HP0267 | JHP0252         | orf1            | chlorohydrolase                                                                                      | Detoxification                   |
| 0       | HP0268 | JHP0253         |                 |                                                                                                      | Unknown Hypothetical             |
| 0       | HP0269 | JHP0254         |                 | conserved hypothetical ATP-binding protein                                                           | Conserve Hypothetical            |
| 5       | HP0270 | JHP0255         |                 |                                                                                                      | Unknown Hypothetical             |
| 1       | HP0271 | JHP0256         |                 |                                                                                                      | Unknown Hypothetical             |
| 0       | HP0272 | JHP0257         |                 |                                                                                                      | Unknown Hypothetical             |
| 14      | HP0273 | JHP0258         |                 |                                                                                                      | Unknown Hypothetical             |
| 2       | HP0274 | JHP0259         |                 | conserved hypothetical protein                                                                       | Conserve Hypothetical            |
| 0       | HP0275 | JHP0260         | addB            | ATP-dependent nuclease                                                                               | DNA/RNA Synthesis and Processing |
| 0       | HP0276 | JHP0261         |                 |                                                                                                      | Unknown Hypothetical             |
| 0       | HP0277 | JHP0262         |                 | ferredoxin                                                                                           | Biosynthesis and Metabolism      |
| 6       | HP0278 | JHP0263         | gppA            | guanosine pentaphosphate phosphohydrolase , GUANOSINE-5'-TRIPHOSPHATE,3'-DIPHOSPHATE PYROPHOSPHATASE | Regulation                       |
| 0       | HP0279 | JHP0264         | rfaC,<br>waaC   | lipopolysaccharide heptosyltransferase-1                                                             | Cell Envelope                    |
| 2       | HP0280 | JHP0265         | ibpB,<br>waaM   | heat shock protein B , putative LIPID A BIOSYNTHESIS ACYLTRANSFERASE                                 | Other                            |
| 5       | HP0281 | JHP0266         | tgt             | tRNA-guanine transglycosylase , QUEUINE TRNA-RIBOSYLTRANSFERASE                                      | Protein Synthesis and Processing |
| 4       | HP0282 | JHP0267         |                 |                                                                                                      | Unknown Hypothetical             |
| 5       | HP0283 | JHP0268         | aroB            | 3-dehydroquinate synthase                                                                            | Biosynthesis and Metabolism      |
| 4       | HP0284 | JHP0269         |                 | conserved hypothetical integral membrane protein                                                     | Conserve Hypothetical            |
| 2       | HP0285 | JHP0270         |                 | conserved hypothetical protein                                                                       | Conserve Hypothetical            |
| 3       | HP0286 | JHP0271         | ftsH,<br>ftsH_1 | cell division protein , ATP-DEPENDENT ZINC METALLOPEPTIDASE                                          | Cell Division                    |
| 1       | HP0287 | JHP0272         |                 |                                                                                                      | Unknown Hypothetical             |

| Tn Hits | TIGR#  | ASTRA#  | Gene Name   | Gene Description                                                                                                             | Process                          |
|---------|--------|---------|-------------|------------------------------------------------------------------------------------------------------------------------------|----------------------------------|
| 0       | HP0288 | JHP0273 |             |                                                                                                                              | Unknown Hypothetical             |
| 0       | HP0289 | JHP0274 |             | toxin-like outer membrane protein, putative vacuolating cytotoxin (VacA) paralog                                             | Outer Membrane Protein           |
| 0       | HP0290 | JHP0275 | lysA        | diaminopimelate decarboxylase (dap decarboxylase) , DIAMINOPIMELATE DECARBOXYLASE                                            | Biosynthesis and Metabolism      |
| 1       | HP0291 | JHP0276 |             |                                                                                                                              | Unknown Hypothetical             |
| 11      | HP0292 | JHP0277 |             |                                                                                                                              | Unknown Hypothetical             |
| 9       | HP0293 | JHP0278 | pabB        | para-aminobenzoate synthetase , P-AMINO BENZOATE SYNTHETASE                                                                  | Biosynthesis and Metabolism      |
| 4       | HP0294 | JHP0279 | aimE, amiE  | aliphatic amidase                                                                                                            | Biosynthesis and Metabolism      |
| 7       | HP0295 | JHP0280 | fla, flgL   | flagellin B homolog , putative FLAGELLAR-HOOK ASSOCIATED PROTEIN 3 (HAP3)                                                    | Motility                         |
| 2       | HP0296 | JHP0281 | rpl21, rplU | ribosomal protein L21 , 50S RIBOSOMAL PROTEIN L21                                                                            | Protein Synthesis and Processing |
| 0       | HP0297 | JHP0282 | rpl27, rpmA | ribosomal protein L27 , 50S RIBOSOMAL PROTEIN L27                                                                            | Protein Synthesis and Processing |
| 0       | HP0298 | JHP0283 | dppA        | dipeptide ABC transporter, periplasmic dipeptide-binding protein , PERIPLASMIC DIPEPTIDE TRANSPORT SUBSTRATE-BINDING PROTEIN | Transporters                     |
| 1       | HP0299 | JHP0284 | dppB        | dipeptide ABC transporter, permease protein , DIPEPTIDE TRANSPORT SYSTEM PERMEASE PROTEIN                                    | Transporters                     |
| 0       | HP0300 | JHP0285 | dppC        | dipeptide ABC transporter, permease protein                                                                                  | Transporters                     |
| 0       | HP0301 | JHP0286 | dppD        | dipeptide ABC transporter, ATP-binding protein , DIPEPTIDE TRANSPORT SYSTEM DIPEPTIDE TRANSPORT SYSTEM ATP-BINDING PROTEIN   | Transporters                     |
| 1       | HP0302 | JHP0287 | dppF        | dipeptide ABC transporter, ATP-binding protein , DIPEPTIDE TRANSPORT SYSTEM ATP-BINDING PROTEIN                              | Transporters                     |
| 3       | HP0303 | JHP0288 | obg         | GTP-binding protein                                                                                                          | Unknown Hypothetical             |
| 2       | HP0304 | JHP0289 |             |                                                                                                                              | Unknown Hypothetical             |
| 1       | HP0305 | JHP0290 |             |                                                                                                                              | Unknown Hypothetical             |
| 8       | HP0306 | JHP0291 | hemL        | glutamate-1-semialdehyde 2,1-aminomutase                                                                                     | Biosynthesis and Metabolism      |
| 1       | HP0307 | JHP0292 |             |                                                                                                                              | Unknown Hypothetical             |
| 11      | HP0308 | JHP0293 |             |                                                                                                                              | Unknown Hypothetical             |
| 2       | HP0309 | JHP0294 |             | conserved hypothetical protein                                                                                               | Conserve Hypothetical            |
| 3       | HP0310 | JHP0295 |             | conserved hypothetical protein                                                                                               | Conserve Hypothetical            |
| 1       | HP0311 | JHP0296 |             |                                                                                                                              | Unknown Hypothetical             |
| 6       | HP0312 | JHP0297 |             | conserved hypothetical ATP-binding protein                                                                                   | Conserve Hypothetical            |
| 9       | HP0313 | JHP0298 | narK        | nitrite extrusion protein                                                                                                    | Transporters                     |

| Tn Hits | TIGR#  | ASTRA#  | Gene Name | Gene Description                                                                                     | Process                          |
|---------|--------|---------|-----------|------------------------------------------------------------------------------------------------------|----------------------------------|
| 0       | HP0315 | N/A     | vapD      | virulence associated protein D                                                                       | Other                            |
| 5       | HP0317 | N/A     | omp9      | outer membrane protein                                                                               | Outer Membrane Protein           |
| 1       | HP0318 | JHP0301 |           | conserved hypothetical protein                                                                       | Conserve Hypothetical            |
| 11      | HP0319 | JHP0302 | argS      | arginyl-tRNA synthetase                                                                              | Protein Synthesis and Processing |
| 1       | HP0320 | JHP0303 |           | conserved hypothetical secreted protein                                                              | Conserve Hypothetical            |
| 0       | HP0321 | JHP0304 | gmk       | 5'-guanylate kinase , GUANYLATE KINASE                                                               | Biosynthesis and Metabolism      |
| 2       | HP0322 | JHP0305 |           | poly E-rich protein                                                                                  | Unknown Hypothetical             |
| 0       | HP0323 | JHP0306 | nuc       | membrane bound endonuclease , putative ENDONUCLEASE                                                  | DNA/RNA Synthesis and Processing |
| 1       | HP0324 | JHP0307 | omp10     | outer membrane protein , putative Outer membrane protein                                             | Outer Membrane Protein           |
| 0       | HP0325 | JHP0308 | flgH      | flagellar basal-body L-ring protein , FLAGELLAR L-RING PROTEIN PRECURSOR (BASAL BODY L-RING PROTEIN) | Motility                         |
| 3       | HP0326 | JHP0309 | neuA      | CMP-N-acetylneuraminic acid synthetase                                                               | Cell Envelope                    |
| 2       | HP0327 | JHP0310 | flaG      | flagellar protein G , putative FLAGELLAR BIOSYNTHESIS PROTEIN                                        | Motility                         |
| 1       | HP0328 | JHP0311 | lpxK      | conserved hypothetical protein, putative tetraacyldisaccharide-1-P 4'-kinase                         | Conserve Hypothetical            |
| 2       | HP0329 | JHP0312 | nadE      | NH(3)-dependent NAD+ synthetase                                                                      | Biosynthesis and Metabolism      |
| 9       | HP0330 | JHP0313 | ilvC      | ketol-acid reductoisomerase                                                                          | Biosynthesis and Metabolism      |
| 3       | HP0331 | JHP0314 | minD      | cell division inhibitor                                                                              | Cell Division                    |
| 1       | HP0332 | JHP0315 | minE      | cell division topological specificity factor , putative cell division topological specificity factor | Cell Division                    |
| 0       | HP0333 | JHP0316 | dprA      | DNA processing chain A                                                                               | DNA/RNA Synthesis and Processing |
| 2       | HP0334 | JHP0317 |           | conserved hypothetical protein                                                                       | Conserve Hypothetical            |
| 0       | HP0336 | N/A     |           |                                                                                                      | Unknown Hypothetical             |
| 1       | HP0337 | JHP0319 |           |                                                                                                      | Unknown Hypothetical             |
| 2       | HP0338 | JHP0320 |           |                                                                                                      | Unknown Hypothetical             |
| 12      | HP0339 | N/A     |           |                                                                                                      | Unknown Hypothetical             |
| 6       | HP0340 | N/A     |           |                                                                                                      | Unknown Hypothetical             |
| 7       | HP0341 | N/A     |           |                                                                                                      | Unknown Hypothetical             |
| 11      | HP0342 | N/A     |           |                                                                                                      | Unknown Hypothetical             |
| 2       | HP0343 | N/A     |           |                                                                                                      | Unknown Hypothetical             |
| 1       | HP0344 | N/A     |           |                                                                                                      | Unknown Hypothetical             |
| 9       | HP0345 | N/A     |           |                                                                                                      | Unknown Hypothetical             |
| 6       | HP0346 | N/A     |           |                                                                                                      | Unknown Hypothetical             |
| 3       | HP0347 | JHP0321 |           | conserved hypothetical protein                                                                       | Conserve Hypothetical            |

| Tn Hits | TIGR#  | ASTRA#  | Gene Name  | Gene Description                                                                                       | Process                          |
|---------|--------|---------|------------|--------------------------------------------------------------------------------------------------------|----------------------------------|
| 4       | HP0348 | JHP0322 | recJ       | single-stranded-DNA-specific exonuclease , putative SINGLE-STRANDED-DNA-SPECIFIC EXONUCLEASE RECJ      | DNA/RNA Synthesis and Processing |
| 3       | HP0349 | JHP0323 | pyrG       | CTP synthetase , CTP SYNTHASE                                                                          | Biosynthesis and Metabolism      |
| 4       | HP0350 | JHP0324 |            |                                                                                                        | Unknown Hypothetical             |
| 6       | HP0351 | JHP0325 | fliF       | flagellar basal-body M-ring protein , FLAGELLAR M-RING PROTEIN                                         | Motility                         |
| 0       | HP0352 | JHP0326 | fliG       | flagellar motor switch protein                                                                         | Motility                         |
| 2       | HP0353 | JHP0327 | fliH       | flagellar export protein , putative FLAGELLAR EXPORT APPARATUS                                         | Motility                         |
| 4       | HP0354 | JHP0328 | dxs        | deoxyxylulose-5-phosphate synthase, putative , 1-DEOXYXYLULOSE-5-PHOSPHATE SYNTHASE                    | Biosynthesis and Metabolism      |
| 1       | HP0355 | JHP0329 | lepA       | GTP-binding membrane protein , GTP-BINDING PROTEIN                                                     | Protein Synthesis and Processing |
| 3       | HP0356 | JHP0330 |            |                                                                                                        | Unknown Hypothetical             |
| 2       | HP0357 | JHP1023 |            | short chain alcohol dehydrogenase, putative oxidoreductase                                             | Biosynthesis and Metabolism      |
| 13      | HP0358 | JHP1022 |            | putative Outer membrane protein                                                                        | Outer Membrane Protein           |
| 0       | HP0359 | JHP1021 |            |                                                                                                        | Unknown Hypothetical             |
| 10      | HP0360 | JHP1020 | galE       | UDP-glucose 4-epimerase                                                                                | Biosynthesis and Metabolism      |
| 4       | HP0361 | JHP1019 | hisT, truA | pseudouridylate synthase I                                                                             | Protein Synthesis and Processing |
| 4       | HP0362 | JHP1018 |            | conserved hypothetical integral membrane protein                                                       | Conserve Hypothetical            |
| 0       | HP0363 | JHP1017 | pcm        | L-isoaspartyl-protein carboxyl methyltransferase , PROTEIN-L-ISOASPARTATE O-METHYLTRANSFERASE          | Protein Synthesis and Processing |
| 1       | HP0364 | JHP1016 | nrdB       | ribonucleoside diphosphate reductase, beta subunit , RIBONUCLEOSIDE-DIPHOSPHATE REDUCTASE 1 BETA CHAIN | Biosynthesis and Metabolism      |
| 5       | HP0365 | N/A     |            |                                                                                                        | Unknown Hypothetical             |
| 6       | HP0366 | JHP1015 |            | spore coat polysaccharide biosynthesis protein C, putative SUGAR NUCLEOTIDE BIOSYNTHESIS               | Cell Envelope                    |
| 4       | HP0367 | JHP1014 |            |                                                                                                        | Unknown Hypothetical             |
| 4       | HP0368 | JHP1013 |            |                                                                                                        | Unknown Hypothetical             |
| 1       | HP0369 | JHP1012 |            | putative TYPE II DNA MODIFICATION ENZYME (METHYLTRANSFERASE)                                           | Restriction Modification         |
| 1       | HP0370 | JHP1011 | accC       | biotin carboxylase                                                                                     | Biosynthesis and Metabolism      |
| 4       | HP0371 | JHP1010 | fabE, accB | biotin carboxyl carrier protein                                                                        | Biosynthesis and Metabolism      |

| Tn Hits | TIGR#  | ASTRA#  | Gene Name    | Gene Description                                                                     | Process                          |
|---------|--------|---------|--------------|--------------------------------------------------------------------------------------|----------------------------------|
| 6       | HP0372 | JHP1009 | dcd          | deoxycytidine triphosphate deaminase                                                 | Biosynthesis and Metabolism      |
| 1       | HP0373 | JHP1008 |              | conserved hypothetical protein, putative outer membrane protein                      | Conserve Hypothetical            |
| 2       | HP0374 | JHP1007 |              | conserved hypothetical protein                                                       | Conserve Hypothetical            |
| 5       | HP0375 | JHP1006 |              |                                                                                      | Unknown Hypothetical             |
| 3       | HP0376 | JHP1005 | hemH         | ferrochelatase                                                                       | Biosynthesis and Metabolism      |
| 11      | HP0377 | JHP1004 | dsbC         | thiol:disulfide interchange protein                                                  | Unknown Hypothetical             |
| 0       | HP0378 | JHP1003 | ycf5         | cytochrome c biogenesis protein , putative CYTOCHROME C-TYPE BIOGENESIS PROTEIN      | Biosynthesis and Metabolism      |
| 3       | HP0379 | JHP1002 |              | fucosyltransferase, ALPHA-(1,3)-FUCOSYLTRANSFERASE                                   | Cell Envelope                    |
| 8       | HP0380 | JHP1001 | gdhA         | glutamate dehydrogenase                                                              | Biosynthesis and Metabolism      |
| 2       | HP0381 | JHP1000 | hemK, hemG   | protoporphyrinogen oxidase                                                           | Biosynthesis and Metabolism      |
| 1       | HP0382 | JHP0999 | YJR117W      | zinc-metallo protease , putative ZINC-METALLO PROTEASE                               | Protein Synthesis and Processing |
| 3       | HP0383 | JHP0998 |              |                                                                                      | Unknown Hypothetical             |
| 12      | HP0384 | JHP0997 |              |                                                                                      | Unknown Hypothetical             |
| 1       | HP0385 | JHP0996 |              |                                                                                      | Unknown Hypothetical             |
| 0       | HP0386 | JHP0995 |              |                                                                                      | Unknown Hypothetical             |
| 2       | HP0387 | JHP0994 | priA         | primosomal protein replication factor , PRIMOSOMAL PROTEIN N' (REPLICATION FACTOR Y) | DNA/RNA Synthesis and Processing |
| 0       | HP0388 | JHP0993 |              | conserved hypothetical protein                                                       | Conserve Hypothetical            |
| 2       | HP0389 | JHP0992 | sodB, sodF   | superoxide dismutase , iron-dependent superoxide dismutase                           | Detoxification                   |
| 3       | HP0390 | JHP0991 | tagD, tpx    | adhesin-thiol peroxidase , THIOL PEROXIDASE                                          | Unknown Hypothetical             |
| 4       | HP0391 | JHP0990 | cheW         | purine-binding chemotaxis protein , histidine kinase - MCP coupling protein          | Motility                         |
| 11      | HP0392 | JHP0989 | cheA         | histidine kinase                                                                     | Motility                         |
| 4       | HP0393 | JHP0988 | cheV, cheV_3 | chemotaxis protein , putative chemotaxis protein                                     | Motility                         |
| 2       | HP0394 | JHP0987 |              |                                                                                      | Unknown Hypothetical             |
| 0       | HP0395 | JHP0986 |              | conserved hypothetical protein                                                       | Conserve Hypothetical            |
| 2       | HP0396 | JHP0985 |              | conserved hypothetical protein                                                       | Conserve Hypothetical            |
| 4       | HP0397 | JHP0984 | serA         | phosphoglycerate dehydrogenase , D-3-PHOSPHOGLYCERATE DEHYDROGENASE                  | Biosynthesis and Metabolism      |
| 1       | HP0398 | JHP0983 |              |                                                                                      | Unknown Hypothetical             |
| 2       | HP0399 | JHP0982 | rps1, rpsA   | ribosomal protein S1 , 30S RIBOSOMAL PROTEIN S1                                      | Protein Synthesis and Processing |
| 1       | HP0400 | JHP0981 | lytB         | penicillin tolerance protein , LYSIS TOLERANCE PROTEIN                               | Regulation                       |

| Tn Hits | TIGR#  | ASTRA#  | Gene Name  | Gene Description                                                                                     | Process                          |
|---------|--------|---------|------------|------------------------------------------------------------------------------------------------------|----------------------------------|
| 4       | HP0401 | JHP0980 | aroA       | 3-phosphoshikimate 1-carboxyvinyltransferase , 3-PHOSPHOSHIKIMATE 1-CARBOXYVINYL TRANSFERASE         | Biosynthesis and Metabolism      |
| 1       | HP0402 | JHP0979 | pheT       | phenylalanyl-tRNA synthetase, beta subunit , PHENYLALANYL-TRNA SYNTHETASE BETA CHAIN                 | Protein Synthesis and Processing |
| 0       | HP0403 | JHP0978 | pheS       | phenylalanyl-tRNA synthetase, alpha subunit , PHENYLALANYL-TRNA SYNTHETASE ALPHA CHAIN               | Protein Synthesis and Processing |
| 1       | HP0404 | JHP0977 |            | protein kinase C inhibitor , HIT FAMILY PROTEIN                                                      | Protein Synthesis and Processing |
| 0       | HP0405 | JHP0976 |            | nifS-like protein, putative AMINOTRANSFERASE                                                         | Unknown Hypothetical             |
| 7       | HP0406 | JHP0975 |            |                                                                                                      | Unknown Hypothetical             |
| 9       | HP0407 | JHP0974 | bisC       | biotin sulfoxide reductase , putative S/N-oxide reductase                                            | Biosynthesis and Metabolism      |
| 0       | HP0408 | JHP0973 |            |                                                                                                      | Unknown Hypothetical             |
| 0       | HP0409 | JHP0972 | guaA       | GMP synthase , GMP SYNTHETASE                                                                        | Biosynthesis and Metabolism      |
| 2       | HP0410 | JHP0971 | hpaA       | putative neuraminyllactose-binding hemagglutinin homolog , putative PARALOG OF HpaA                  | Motility                         |
| 2       | HP0411 | N/A     |            |                                                                                                      | Unknown Hypothetical             |
| 1       | HP0412 | JHP0970 |            |                                                                                                      | Unknown Hypothetical             |
| 2       | HP0415 | JHP0969 |            | conserved hypothetical integral membrane protein                                                     | Conserve Hypothetical            |
| 8       | HP0416 | JHP0968 | cfa        | cyclopropane fatty acid synthase , CYCLOPOCYCLOPROPANE FATTY ACID SYNTHASE                           | Biosynthesis and Metabolism      |
| 2       | HP0417 | JHP0967 | metS, metG | methionyl-tRNA synthetase                                                                            | Protein Synthesis and Processing |
| 0       | HP0418 | JHP0966 |            |                                                                                                      | Unknown Hypothetical             |
| 0       | HP0419 | JHP0965 |            | conserved hypothetical protein                                                                       | Conserve Hypothetical            |
| 4       | HP0420 | JHP0964 |            |                                                                                                      | Unknown Hypothetical             |
| 2       | HP0421 | JHP0963 | capJ       | type 1 capsular polysaccharide biosynthesis protein J , putative POLYSACCHARIDE BIOSYNTHESIS PROTEIN | Cell Envelope                    |
| 2       | HP0422 | JHP0962 | speA       | arginine decarboxylase                                                                               | Biosynthesis and Metabolism      |
| 3       | HP0423 | N/A     |            |                                                                                                      | Unknown Hypothetical             |
| 4       | HP0424 | N/A     |            |                                                                                                      | Unknown Hypothetical             |
| 2       | HP0425 | N/A     |            |                                                                                                      | Unknown Hypothetical             |
| 3       | HP0426 | N/A     |            |                                                                                                      | Unknown Hypothetical             |
| 2       | HP0427 | JHP0952 |            |                                                                                                      | Unknown Hypothetical             |
| 1       | HP0428 | N/A     |            | phage/colicin/tellurite resistance cluster terY protein                                              | Outer Membrane Protein           |
| 7       | HP0430 | N/A     |            |                                                                                                      | Unknown Hypothetical             |
| 2       | HP0431 | N/A     | ptc1       | protein phosphatase 2C homolog                                                                       | Unknown Hypothetical             |

| Tn Hits | TIGR#  | ASTRA#  | Gene Name    | Gene Description                                                                                                           | Process                          |
|---------|--------|---------|--------------|----------------------------------------------------------------------------------------------------------------------------|----------------------------------|
| 4       | HP0432 | N/A     |              | protein kinase C-like protein                                                                                              | Other                            |
| 8       | HP0438 | N/A     | tnpB         | IS605 transposase                                                                                                          | Transposon                       |
| 0       | HP0439 | N/A     |              |                                                                                                                            | Unknown Hypothetical             |
| 0       | HP0445 | N/A     |              |                                                                                                                            | Unknown Hypothetical             |
| 4       | HP0453 | N/A     |              |                                                                                                                            | Unknown Hypothetical             |
| 3       | HP0454 | N/A     |              |                                                                                                                            | Unknown Hypothetical             |
| 0       | HP0456 | N/A     |              |                                                                                                                            | Unknown Hypothetical             |
| 2       | HP0457 | N/A     |              |                                                                                                                            | Unknown Hypothetical             |
| 0       | HP0460 | N/A     |              |                                                                                                                            | Unknown Hypothetical             |
| 1       | HP0462 | N/A     | hsdS         | type I restriction enzyme S protein                                                                                        | Restiction Modification          |
| 3       | HP0463 | JHP0415 | hsdM, hsdM_1 | type I restriction enzyme M protein , TYPE I RESTRICTION ENZYME (MODIFICATION SUBUNIT)                                     | Restiction Modification          |
| 9       | HP0464 | JHP0416 | hsdR         | type I restriction enzyme R protein                                                                                        | Restiction Modification          |
| 3       | HP0465 | JHP0417 |              | conserved hypothetical protein                                                                                             | Conserve Hypothetical            |
| 0       | HP0466 | JHP0418 |              | conserved hypothetical protein                                                                                             | Conserve Hypothetical            |
| 14      | HP0467 | JHP0419 |              | conserved hypothetical integral membrane protein                                                                           | Conserve Hypothetical            |
| 2       | HP0468 | JHP0420 |              | conserved hypothetical protein                                                                                             | Conserve Hypothetical            |
| 0       | HP0469 | JHP0421 |              | conserved hypothetical protein                                                                                             | Conserve Hypothetical            |
| 0       | HP0470 | JHP0422 | pepF         | oligoendopeptidase F , OLIGOPEPTIDASE                                                                                      | Protein Synthesis and Processing |
| 3       | HP0471 | JHP0423 | kefB         | glutathione-regulated potassium-efflux system protein                                                                      | Transporters                     |
| 4       | HP0472 | JHP0424 | omp11        | outer membrane protein , putative Outer membrane protein                                                                   | Outer Membrane Protein           |
| 3       | HP0473 | JHP0425 | modA         | molybdenum ABC transporter, periplasmic molybdate-binding protein , Molybdate ABC transporter, periplasmic-binding protein | Transporters                     |
| 5       | HP0474 | JHP0426 | modB         | molybdenum ABC transporter, permease protein , Molybdate ABC transporter, permease                                         | Transporters                     |
| 2       | HP0475 | JHP0427 | modD, modC   | molybdenum ABC transporter, ATP-binding protein , Molybdate ABC transporter, ATP-binding protein                           | Transporters                     |
| 9       | HP0476 | JHP0428 | gltX, gltX_1 | glutamyl-tRNA synthetase                                                                                                   | Protein Synthesis and Processing |
| 8       | HP0477 | JHP0429 | omp12        | outer membrane protein , putative Outer membrane protein                                                                   | Outer Membrane Protein           |
| 4       | HP0478 | JHP0430 | VSPIM        | adenine specific DNA methyltransferase , TYPE II DNA MODIFICATION ENZYME (METHYLTRANSFERASE)                               | Restiction Modification          |
| 3       | HP0479 | JHP0431 |              |                                                                                                                            | Unknown Hypothetical             |
| 6       | HP0480 | JHP0432 | yihK         | GTP-binding protein, fusA-homolog                                                                                          | Unknown Hypothetical             |
| 6       | HP0481 | JHP0433 | MFOKI        | adenine specific DNA methyltransferase , putative TYPE II DNA MODIFICATION ENZYME (METHYLTRANSFERASE)                      | Restiction Modification          |
| 4       | HP0482 | JHP0434 |              |                                                                                                                            | Unknown Hypothetical             |



| Tn Hits | TIGR#  | ASTRA#  | Gene Name   | Gene Description                                                                                 | Process                          |
|---------|--------|---------|-------------|--------------------------------------------------------------------------------------------------|----------------------------------|
| 4       | HP0483 | JHP0435 |             | TYPE II DNA MODIFICATION ENZYME (METHYLTRANSFERASE)                                              | Restiction Modification          |
| 4       | HP0484 | JHP0436 |             |                                                                                                  | Unknown Hypothetical             |
| 10      | HP0485 | JHP0437 |             | catalase-like protein                                                                            | Unknown Hypothetical             |
| 13      | HP0486 | JHP0438 |             | Outer membrane protein                                                                           | Outer Membrane Protein           |
| 1       | HP0487 | JHP0439 |             | putative Outer membrane protein                                                                  | Outer Membrane Protein           |
| 0       | HP0488 | JHP0440 |             |                                                                                                  | Unknown Hypothetical             |
| 0       | HP0489 | JHP0441 |             |                                                                                                  | Unknown Hypothetical             |
| 2       | HP0490 | JHP0442 |             | putative potassium channel protein, putative, PUTATIVE POTASSIUM CHANNEL PROTEIN                 | Transporters                     |
| 0       | HP0491 | JHP0443 | rpL28, rpmB | ribosomal protein L28 , 50S RIBOSOMAL PROTEIN L28                                                | Protein Synthesis and Processing |
| 1       | HP0492 | JHP0444 |             | putative paralog of HpaA                                                                         | Outer Membrane Protein           |
| 2       | HP0493 | JHP0445 | mraY        | phospho-N-acetylmuramoyl-pentapeptide-transferase                                                | Cell Envelope                    |
| 1       | HP0494 | JHP0446 | murD        | UDP-N-acetylmuramoylalanine-D-glutamate ligase , UDP-N-ACETYLMURAMOYLALANINE--D-GLUTAMATE LIGASE | Cell Envelope                    |
| 2       | HP0495 | JHP0447 |             |                                                                                                  | Unknown Hypothetical             |
| 1       | HP0496 | JHP0448 |             | conserved hypothetical protein                                                                   | Conserve Hypothetical            |
| 5       | HP0497 | JHP0449 |             | sodium- and chloride-dependent transporter, putative transporter                                 | Transporters                     |
| 6       | HP0498 | JHP0450 |             | sodium- and chloride-dependent transporter, putative transporter                                 | Transporters                     |
| 3       | HP0499 | JHP0451 | pIdA        | phospholipase A1 precursor (DR-phospholipase A), putative PHOSPHOLIPASE A1                       | Biosynthesis and Metabolism      |
| 0       | HP0500 | JHP0452 | dnaN        | DNA polymerase III beta-subunit , DNA POLYMERASE III, BETA CHAIN                                 | DNA/RNA Synthesis and Processing |
| 6       | HP0501 | JHP0453 | gyrB        | DNA gyrase, sub B , DNA GYRASE SUBUNIT B                                                         | DNA/RNA Synthesis and Processing |
| 1       | HP0502 | JHP0454 |             |                                                                                                  | Unknown Hypothetical             |
| 4       | HP0503 | JHP0454 |             |                                                                                                  | Unknown Hypothetical             |
| 1       | HP0504 | JHP0455 |             |                                                                                                  | Unknown Hypothetical             |
| 0       | HP0505 | JHP0455 |             |                                                                                                  | Unknown Hypothetical             |
| 2       | HP0506 | JHP0456 |             | conserved hypothetical secreted protein, putative Outer membrane protein                         | Conserve Hypothetical            |
| 0       | HP0507 | JHP0457 |             | conserved hypothetical protein                                                                   | Conserve Hypothetical            |
| 9       | HP0508 | JHP0458 |             |                                                                                                  | Unknown Hypothetical             |
| 8       | HP0509 | JHP0459 | glcD        | glycolate oxidase subunit , putative Glycolate oxidase                                           | Biosynthesis and Metabolism      |
| 0       | HP0510 | JHP0460 | dapB        | dihydrodipicolinate reductase                                                                    | Biosynthesis and Metabolism      |
| 1       | HP0514 | JHP0463 | rpI9, rpII  | ribosomal protein L9 , 50S RIBOSOMAL PROTEIN L9                                                  | Protein Synthesis and Processing |

| Tn Hits | TIGR#  | ASTRA#  | Gene Name      | Gene Description                                                            | Process                          |
|---------|--------|---------|----------------|-----------------------------------------------------------------------------|----------------------------------|
| 1       | HP0515 | JHP0464 | hslV           | heat shock protein                                                          | Protein Synthesis and Processing |
| 5       | HP0516 | JHP0465 | hslU           | heat shock protein                                                          | Protein Synthesis and Processing |
| 5       | HP0517 | JHP0466 | era            | GTP-binding protein                                                         | Other                            |
| 1       | HP0518 | JHP0467 |                | conserved hypothetical secreted protein                                     | Conserve Hypothetical            |
| 1       | HP0519 | JHP0468 |                | conserved hypothetical protein                                              | Conserve Hypothetical            |
| 9       | HP0520 | JHP0469 | cag1, orf6     | cag pathogenicity island protein , putative cag island protein              | PAI                              |
| 3       | HP0521 | JHP0470 | orf7           | cag island protein                                                          | PAI                              |
| 6       | HP0522 | JHP0471 | cag3, orf8     | cag pathogenicity island protein , cag island protein                       | PAI                              |
| 3       | HP0523 | JHP0472 | cag4, orf9     | cag pathogenicity island protein , cag island protein                       | PAI                              |
| 11      | HP0524 | JHP0473 | cag5, virD4    | cag pathogenicity island protein , cag island protein, DNA transfer protein | PAI                              |
| 5       | HP0525 | JHP0474 | virB11_1       | virB11 homolog, cag island protein, DNA transfer protein                    | PAI                              |
| 7       | HP0526 | JHP0475 | cag6, orf12    | cag pathogenicity island protein , cag island protein                       | PAI                              |
| 10      | HP0527 | JHP0476 | cag7, orf13/14 | cag pathogenicity island protein , cag island protein                       | PAI                              |
| 3       | HP0528 | JHP0477 | cag8, orf15    | cag pathogenicity island protein , cag island protein                       | PAI                              |
| 6       | HP0529 | JHP0478 | cag9, orf16    | cag pathogenicity island protein , cag island protein                       | PAI                              |
| 4       | HP0530 | JHP0479 | cag10, orf17   | cag pathogenicity island protein , cag island protein                       | PAI                              |
| 3       | HP0531 | JHP0480 | cag11, orf18   | cag pathogenicity island protein , cag island protein                       | PAI                              |
| 0       | HP0532 | JHP0481 | cag12, cagT    | cag pathogenicity island protein , cag island protein                       | PAI                              |
| 2       | HP0534 | JHP0482 | cag13, cagS    | cag pathogenicity island protein , cag island protein                       | PAI                              |
| 2       | HP0535 | JHP0483 | cag14, cagQ    | cag pathogenicity island protein , cag island protein                       | PAI                              |
| 1       | HP0536 | JHP0484 | cag15, cagP    | cag pathogenicity island protein , cag island protein                       | PAI                              |
| 5       | HP0537 | JHP0485 | cag16, cagM    | cag pathogenicity island protein , cag island protein                       | PAI                              |
| 4       | HP0538 | JHP0486 | cag17, cagN    | cag pathogenicity island protein , cag island protein                       | PAI                              |
| 3       | HP0539 | JHP0487 | cag18, cagL    | cag pathogenicity island protein , cag island protein                       | PAI                              |

| Tn Hits | TIGR#  | ASTRA#  | Gene Name      | Gene Description                                                                                      | Process                          |
|---------|--------|---------|----------------|-------------------------------------------------------------------------------------------------------|----------------------------------|
| 1       | HP0540 | JHP0488 | cag19,<br>cagl | cag pathogenicity island protein , cag island protein                                                 | PAI                              |
| 2       | HP0541 | JHP0489 | cag20,<br>cagH | cag pathogenicity island protein , cag island protein                                                 | PAI                              |
| 1       | HP0542 | JHP0490 | cag21,<br>cagG | cag pathogenicity island protein , cag island protein                                                 | PAI                              |
| 5       | HP0543 | JHP0491 | cag22,<br>cagF | cag pathogenicity island protein , cag island protein                                                 | PAI                              |
| 9       | HP0544 | JHP0492 | cag23,<br>cagE | cag pathogenicity island protein , DNA transfer protein (Agrobacterium VirB4 homolog)                 | PAI                              |
| 0       | HP0545 | JHP0493 | cag24,<br>cagD | cag pathogenicity island protein , cag island protein                                                 | PAI                              |
| 1       | HP0546 | JHP0494 | cag25,<br>cagC | cag pathogenicity island protein , cag island protein                                                 | PAI                              |
| 7       | HP0547 | JHP0495 | cag26,<br>cagA | cag pathogenicity island protein , cag island protein, CYTOTOXICITY ASSOCIATED IMMUNODOMINANT ANTIGEN | PAI                              |
| 0       | HP0548 | N/A     |                |                                                                                                       | DNA/RNA Synthesis and Processing |
| 3       | HP0549 | JHP0496 | glr,<br>murl   | glutamate racemase                                                                                    | Cell Envelope                    |
| 4       | HP0550 | JHP0497 | rho            | transcription termination factor Rho , TRANSCRIPTION TERMINATION FACTOR                               | DNA/RNA Synthesis and Processing |
| 0       | HP0551 | JHP0498 | rpl31,<br>rpmE | ribosomal protein L31 , 50S RIBOSOMAL PROTEIN L31                                                     | Protein Synthesis and Processing |
| 3       | HP0552 | JHP0499 |                | conserved hypothetical protein                                                                        | Conserve Hypothetical            |
| 1       | HP0553 | JHP0500 |                | conserved hypothetical protein                                                                        | Conserve Hypothetical            |
| 0       | HP0554 | JHP0501 |                |                                                                                                       | Unknown Hypothetical             |
| 4       | HP0555 | JHP0502 |                |                                                                                                       | Unknown Hypothetical             |
| 5       | HP0556 | JHP0503 |                |                                                                                                       | Unknown Hypothetical             |
| 6       | HP0557 | JHP0504 | accA           | acetyl-coenzyme A carboxylase , ACETYL-COENZYME A CARBOXYLASE SUBUNIT A                               | Biosynthesis and Metabolism      |
| 6       | HP0558 | JHP0505 | fabF,<br>fabB  | beta ketoacyl-acyl carrier protein synthase II , BETA-KETOACYL-ACP SYNTHASE I                         | Biosynthesis and Metabolism      |
| 0       | HP0559 | JHP0506 | acpP           | acyl carrier protein                                                                                  | Biosynthesis and Metabolism      |
| 4       | HP0560 | JHP0507 |                |                                                                                                       | Unknown Hypothetical             |
| 18      | HP0561 | JHP0508 | fabG           | 3-ketoacyl-acyl carrier protein reductase , ACETYL-COENZYME A CARBOXYLASE SUBUNIT A                   | Biosynthesis and Metabolism      |
| 4       | HP0563 | JHP0510 |                |                                                                                                       | Unknown Hypothetical             |

| Tn Hits | TIGR#  | ASTRA#  | Gene Name    | Gene Description                                                                                                           | Process                          |
|---------|--------|---------|--------------|----------------------------------------------------------------------------------------------------------------------------|----------------------------------|
| 1       | HP0564 | JHP0511 |              |                                                                                                                            | Unknown Hypothetical             |
| 2       | HP0565 | JHP0512 |              |                                                                                                                            | Unknown Hypothetical             |
| 5       | HP0566 | JHP0513 | dapF         | diaminopimelate epimerase                                                                                                  | Biosynthesis and Metabolism      |
| 6       | HP0567 | JHP0514 |              | membrane protein, putative Inner membrane protein                                                                          | Outer Membrane Protein           |
| 7       | HP0568 | JHP0515 |              |                                                                                                                            | Unknown Hypothetical             |
| 17      | HP0569 | JHP0516 | gtp1         | GTP-binding protein                                                                                                        | Unknown Hypothetical             |
| 1       | HP0570 | JHP0517 | pepA         | aminopeptidase a/i , AMINOPEPTIDASE                                                                                        | Protein Synthesis and Processing |
| 0       | HP0572 | JHP0519 | apt          | adenine phosphoribosyltransferase                                                                                          | Biosynthesis and Metabolism      |
| 0       | HP0573 | JHP0520 |              |                                                                                                                            | Unknown Hypothetical             |
| 0       | HP0574 | JHP0521 | lacA, rpi    | galactosidase acetyltransferase , RIBOSE 5-PHOSPHATE ISOMERASE                                                             | Biosynthesis and Metabolism      |
| 2       | HP0575 | JHP0522 |              | conserved hypothetical membrane protein                                                                                    | Conserve Hypothetical            |
| 4       | HP0576 | JHP0523 | lepB         | signal peptidase I                                                                                                         | Protein Synthesis and Processing |
| 1       | HP0577 | JHP0524 | folD         | methylene-tetrahydrofolate dehydrogenase , METHYLENETETRAHYDROFOLATE DEHYDROGENASE/METHENYLTETRAHYDROFOLATE CYCLOHYDROLASE | Biosynthesis and Metabolism      |
| 5       | HP0578 | JHP0525 |              |                                                                                                                            | Unknown Hypothetical             |
| 4       | HP0579 | JHP0526 |              |                                                                                                                            | Unknown Hypothetical             |
| 5       | HP0580 | JHP0527 |              |                                                                                                                            | Unknown Hypothetical             |
| 6       | HP0581 | JHP0528 | pyrC, pyrC_2 | dihydroorotase                                                                                                             | Biosynthesis and Metabolism      |
| 3       | HP0582 | JHP0529 | tonB_1       | putative SIDEROPHORE-MEDIATED IRON TRANSPORT PROTEIN                                                                       | Iron Uptake                      |
| 0       | HP0583 | JHP0530 |              |                                                                                                                            | Unknown Hypothetical             |
| 1       | HP0584 | JHP0531 | fliN         | flagellar switch protein                                                                                                   | Motility                         |
| 1       | HP0585 | JHP0532 | nth          | endonuclease III                                                                                                           | DNA/RNA Synthesis and Processing |
| 0       | HP0586 | JHP0534 |              |                                                                                                                            | Unknown Hypothetical             |
| 0       | HP0587 | JHP0535 | pabC         | aminodeoxychorismate lyase                                                                                                 | Biosynthesis and Metabolism      |
| 13      | HP0588 | JHP0536 | oorD         | ferredoxin-like protein, SUBUNIT OF 2-OXOGLUTARATE OXIDOREDUCTASE                                                          | Biosynthesis and Metabolism      |
| 0       | HP0589 | JHP0537 | oorA         | ferredoxin oxidoreductase, alpha subunit, SUBUNIT OF 2-OXOGLUTARATE OXIDOREDUCTASE                                         | Biosynthesis and Metabolism      |
| 0       | HP0590 | JHP0538 | oorB         | ferredoxin oxidoreductase, beta subunit, SUBUNIT OF 2-OXOGLUTARATE OXIDOREDUCTASE                                          | Biosynthesis and Metabolism      |
| 0       | HP0591 | JHP0539 | oorC         | ferredoxin oxidoreductase, gamma subunit, SUBUNIT OF 2-OXOGLUTARATE OXIDOREDUCTASE                                         | Biosynthesis and Metabolism      |

| Tn Hits | TIGR#  | ASTRA#  | Gene Name    | Gene Description                                                                              | Process                          |
|---------|--------|---------|--------------|-----------------------------------------------------------------------------------------------|----------------------------------|
| 2       | HP0592 | N/A     | res          | type III restriction enzyme R protein                                                         | Restiction Modification          |
| 1       | HP0593 | N/A     | mod          | adenine specific DNA methyltransferase                                                        | Restiction Modification          |
| 5       | HP0594 | JHP0541 |              |                                                                                               | Unknown Hypothetical             |
| 8       | HP0595 | JHP0542 |              |                                                                                               | Unknown Hypothetical             |
| 4       | HP0596 | JHP0543 |              |                                                                                               | Unknown Hypothetical             |
| 0       | HP0597 | JHP0544 | PBP-1A       | penicillin-binding protein 1A , PENICILLIN-BINDING PROTEIN                                    | Cell Envelope                    |
| 0       | HP0598 | JHP0545 | bioF         | 8-amino-7-oxononanoate synthase                                                               | Biosynthesis and Metabolism      |
| 1       | HP0599 | JHP0546 | hylB         | hemolysin secretion protein precursor , methyl-accepting chemotaxis protein (MCP)             | Other                            |
| 6       | HP0600 | JHP0547 | spaB         | multidrug resistance protein , putative secretion/efflux abc transporter, ATP-binding protein | Transporters                     |
| 4       | HP0601 | JHP0548 | flaA         | flagellin A                                                                                   | Motility                         |
| 5       | HP0602 | JHP0549 |              | endonuclease III                                                                              | DNA/RNA Synthesis and Processing |
| 3       | HP0603 | JHP0550 |              |                                                                                               | Unknown Hypothetical             |
| 5       | HP0604 | JHP0551 | hemE         | uroporphyrinogen decarboxylase                                                                | Biosynthesis and Metabolism      |
| 0       | HP0605 | JHP0552 |              |                                                                                               | Unknown Hypothetical             |
| 2       | HP0606 | JHP0553 | mtrC         | membrane fusion protein , putative efflux transporter                                         | Outer Membrane Protein           |
| 2       | HP0607 | JHP0554 | acrB         | acriflavine resistance protein , putative efflux transporter                                  | Transporters                     |
| 1       | HP0608 | JHP0555 |              |                                                                                               | Unknown Hypothetical             |
| 8       | HP0609 | JHP0556 |              | putative vacuolating cytotoxin (VacA) paralog                                                 | Unknown Hypothetical             |
| 3       | HP0610 | JHP0556 |              | toxin-like outer membrane protein                                                             | Outer Membrane Protein           |
| 3       | HP0611 | JHP0299 |              |                                                                                               | Unknown Hypothetical             |
| 3       | HP0612 | JHP0299 |              |                                                                                               | Unknown Hypothetical             |
| 4       | HP0613 | JHP0300 |              | ABC transporter, ATP-binding protein, putative abc transporter, ATP-binding protein           | Transporters                     |
| 0       | HP0614 | JHP0557 |              |                                                                                               | Unknown Hypothetical             |
| 4       | HP0615 | JHP0558 | lig          | DNA ligase                                                                                    | DNA/RNA Synthesis and Processing |
| 1       | HP0616 | JHP0559 | cheV, cheV_2 | chemotaxis protein , putative chemotaxis protein                                              | Motility                         |
| 1       | HP0617 | JHP0560 | aspS         | aspartyl-tRNA synthetase                                                                      | Protein Synthesis and Processing |
| 2       | HP0618 | JHP0561 | adk          | adenylate kinase                                                                              | Biosynthesis and Metabolism      |
| 3       | HP0619 | JHP0563 |              | putative lipopolysaccharide biosynthesis protein                                              | Cell Envelope                    |
| 1       | HP0620 | JHP0564 | ppa          | inorganic pyrophosphatase                                                                     | Biosynthesis and Metabolism      |

| Tn Hits | TIGR#  | ASTRA#  | Gene Name    | Gene Description                                                                                                       | Process                          |
|---------|--------|---------|--------------|------------------------------------------------------------------------------------------------------------------------|----------------------------------|
| 1       | HP0621 | JHP0565 | MutS         | DNA mismatch repair protein                                                                                            | DNA/RNA Synthesis and Processing |
| 2       | HP0622 | JHP0566 |              |                                                                                                                        | Unknown Hypothetical             |
| 2       | HP0623 | JHP0567 | murC         | UDP-N-acetylmuramate-alanine ligase , UDP-N-ACETYLMURAMATE--ALANINE LIGASE                                             | Cell Envelope                    |
| 2       | HP0624 | JHP0568 | aspB         | solute-binding signature and mitochondrial signature protein , AMINOTRANSFERASE                                        | Protein Synthesis and Processing |
| 3       | HP0625 | JHP0569 | gcpE         | protein E                                                                                                              | Other                            |
| 4       | HP0626 | JHP0570 | dapD         | tetrahydrodipicolinate N-succinyltransferase , putative 2,3,4,5-TETRAHYDROPYRIDINE 2-CARBOXYLATE N-SUCCINYLTRANSFERASE | Biosynthesis and Metabolism      |
| 2       | HP0627 | JHP0571 |              |                                                                                                                        | Unknown Hypothetical             |
| 4       | HP0628 | JHP0571 |              |                                                                                                                        | Unknown Hypothetical             |
| 2       | HP0629 | JHP0572 |              |                                                                                                                        | Unknown Hypothetical             |
| 10      | HP0630 | JHP0573 | mda66        | modulator of drug activity                                                                                             | Outer Membrane Protein           |
| 9       | HP0631 | JHP0574 | hydA, hyaA   | quinone-reactive Ni/Fe hydrogenase, small subunit , Hydrogenase, small subunit                                         | Biosynthesis and Metabolism      |
| 10      | HP0632 | JHP0575 | hydB, hyaB   | quinone-reactive Ni/Fe hydrogenase, large subunit , Hydrogenase, large subunit                                         | Biosynthesis and Metabolism      |
| 3       | HP0633 | JHP0576 | hydC, hyaC   | quinone-reactive Ni/Fe hydrogenase, cytochrome b subunit , Hydrogenase, cytochrome subunit                             | Biosynthesis and Metabolism      |
| 5       | HP0634 | JHP0577 | hydD, hyaD   | quinone-reactive Ni/Fe hydrogenase , Hydrogenase expression/formation protein                                          | Biosynthesis and Metabolism      |
| 5       | HP0635 | JHP0578 |              |                                                                                                                        | Unknown Hypothetical             |
| 2       | HP0637 | JHP0580 |              |                                                                                                                        | Unknown Hypothetical             |
| 2       | HP0638 | JHP0581 | omp13        | outer membrane protein , putative Outer membrane protein                                                               | Outer Membrane Protein           |
| 1       | HP0639 | JHP0582 |              | conserved hypothetical protein                                                                                         | Conserve Hypothetical            |
| 5       | HP0640 | JHP0583 | papS, pcnB   | poly(A) polymerase , POLYNUCLEOTIDE ADENYLYLTRANSFERASE                                                                | DNA/RNA Synthesis and Processing |
| 0       | HP0641 | JHP0584 |              |                                                                                                                        | Unknown Hypothetical             |
| 1       | HP0642 | JHP0586 |              | NAD(P)H-flavin oxidoreductase, putative Oxidoreductase                                                                 | Biosynthesis and Metabolism      |
| 11      | HP0643 | JHP0588 | gltX, gltX_2 | glutamyl-tRNA synthetase                                                                                               | Protein Synthesis and Processing |
| 0       | HP0644 | JHP0589 |              | conserved hypothetical integral membrane protein                                                                       | Conserve Hypothetical            |
| 3       | HP0645 | JHP0590 | slt          | soluble lytic murein transglycosylase , LYTIC MUREIN TRANSGLYCOSYLASE                                                  | Cell Envelope                    |

| Tn Hits | TIGR#  | ASTRA#  | Gene Name  | Gene Description                                                                                 | Process                          |
|---------|--------|---------|------------|--------------------------------------------------------------------------------------------------|----------------------------------|
| 0       | HP0646 | JHP0591 | galU       | UDP-glucose pyrophosphorylase , UTP--GLUCOSE-1-PHOSPHATE URIDYLYLTRANSFERASE                     | Biosynthesis and Metabolism      |
| 0       | HP0647 | JHP0592 |            |                                                                                                  | Unknown Hypothetical             |
| 0       | HP0648 | JHP0593 | murZ, murA | UDP-N-acetylglucosamine enolpyruvyl transferase , UDP-N-ACETYLGLUCOSAMINE ENOLPYRUVYLTRANSFERASE | Cell Envelope                    |
| 1       | HP0649 | JHP0594 | aspA       | aspartate ammonia-lyase                                                                          | Biosynthesis and Metabolism      |
| 0       | HP0650 | JHP0595 |            |                                                                                                  | Unknown Hypothetical             |
| 2       | HP0652 | JHP0597 | serB       | phosphoserine phosphatase                                                                        | Biosynthesis and Metabolism      |
| 1       | HP0653 | JHP0598 | pfr        | nonheme iron-containing ferritin                                                                 | Transporters                     |
| 1       | HP0654 | JHP0599 |            |                                                                                                  | Conserve Hypothetical            |
| 9       | HP0655 | JHP0600 |            | putative Outer membrane protein                                                                  | Outer Membrane Protein           |
| 0       | HP0656 | JHP0601 |            |                                                                                                  | Conserve Hypothetical            |
| 1       | HP0657 | JHP0602 |            | putative PROCESSING PROTEASE                                                                     | Protein Synthesis and Processing |
| 0       | HP0658 | JHP0603 | gatB       | GLU-TRNA AMIDOTRANSFERASE, SUBUNIT B                                                             | Protein Synthesis and Processing |
| 2       | HP0659 | JHP0604 |            |                                                                                                  | Unknown Hypothetical             |
| 6       | HP0660 | JHP0605 |            |                                                                                                  | Unknown Hypothetical             |
| 0       | HP0661 | JHP0606 | rnhA       | RIBONUCLEASE HI                                                                                  | DNA/RNA Synthesis and Processing |
| 0       | HP0662 | JHP0607 | rnc        | RIBONUCLEASE III                                                                                 | DNA/RNA Synthesis and Processing |
| 0       | HP0663 | JHP0608 | aroC       | CHORISMATE SYNTHASE                                                                              | Biosynthesis and Metabolism      |
| 0       | HP0664 | JHP0609 |            |                                                                                                  | Unknown Hypothetical             |
| 1       | HP0665 | JHP0610 | hemN_1     | OXYGEN-INDEPENDENT COPROPORPHYRINOGEN III OXIDASE                                                | Biosynthesis and Metabolism      |
| 3       | HP0666 | JHP0611 | glpC       | glycerol-3-phosphate dehydrogenase                                                               | Biosynthesis and Metabolism      |
| 2       | HP0667 | JHP0612 |            |                                                                                                  | Unknown Hypothetical             |
| 7       | HP0668 | JHP0612 |            |                                                                                                  | Unknown Hypothetical             |
| 10      | HP0669 | JHP0613 |            |                                                                                                  | Unknown Hypothetical             |
| 5       | HP0671 | JHP0614 | omp14      | outer membrane protein , putative Outer membrane protein                                         | Outer Membrane Protein           |
| 2       | HP0672 | JHP0615 | aspB       | solute-binding signature and mitochondrial signature protein , ASPARTATE AMINOTRANSFERASE        | Biosynthesis and Metabolism      |
| 1       | HP0673 | N/A     |            |                                                                                                  | Unknown Hypothetical             |
| 3       | HP0675 | JHP0617 | xerC       | integrase/recombinase , INTEGRASE-RECOMBINASE PROTEIN (XERCD FAMILY)                             | DNA/RNA Synthesis and Processing |
| 4       | HP0676 | JHP0618 | dat1, ogt  | methylated-DNA--protein-cysteine methyltransferase                                               | DNA/RNA Synthesis and Processing |

| Tn Hits | TIGR#  | ASTRA#  | Gene Name    | Gene Description                                                                                          | Process                          |
|---------|--------|---------|--------------|-----------------------------------------------------------------------------------------------------------|----------------------------------|
| 1       | HP0677 | JHP0619 |              | conserved hypothetical integral membrane protein                                                          | Conserve Hypothetical            |
| 2       | HP0679 | JHP0620 | wbpB         | lipopolysaccharide biosynthesis protein , putative LIPOPOLYSACCHARIDE BIOSYNTHESIS PROTEIN                | Cell Envelope                    |
| 2       | HP0680 | JHP0621 | nrdA         | ribonucleoside-diphosphate reductase 1 alpha subunit , RIBONUCLEOSIDE-DIPHOSPHATE REDUCTASE 1 ALPHA CHAIN | Biosynthesis and Metabolism      |
| 5       | HP0683 | JHP0624 | glmU         | UDP-N-acetylglucosamine pyrophosphorylase                                                                 | Biosynthesis and Metabolism      |
| 0       | HP0684 | JHP0625 | fliP         | FLAGELLAR BIOSYNTHESIS PROTEIN                                                                            | Motility                         |
| 1       | HP0685 | JHP0625 | fliP         | flagellar biosynthetic protein                                                                            | Motility                         |
| 5       | HP0686 | JHP0626 | fecA, fecA_1 | iron(III) dicitrate transport protein                                                                     | Transporters                     |
| 9       | HP0687 | JHP0627 | feoB         | iron(II) transport protein , FERROUS IRON TRANSPORT PROTEIN B                                             | Transporters                     |
| 3       | HP0689 | JHP0628 |              |                                                                                                           | Unknown Hypothetical             |
| 12      | HP0690 | JHP0638 | fadA, thl    | acetyl coenzyme A acetyltransferase(thiolase) , ACETYL-COA ACETYLTRANSFERASE                              | Biosynthesis and Metabolism      |
| 2       | HP0691 | JHP0637 | yxjD, scoA   | 3-oxoadipate coA-transferase subunit A , 3-OXOACID COA-TRANSFERASE, SUBUNIT A                             | Biosynthesis and Metabolism      |
| 14      | HP0692 | JHP0636 | yxjE, scoB   | 3-oxoadipate coA-transferase subunit B , 3-OXOACID COA-TRANSFERASE, SUBUNIT B                             | Biosynthesis and Metabolism      |
| 11      | HP0693 | JHP0635 | atoE         | conserved hypothetical integral membrane protein, short-chain fatty acids transporter                     | Conserve Hypothetical            |
| 4       | HP0694 | JHP0634 |              | putative Outer membrane protein                                                                           | Outer Membrane Protein           |
| 15      | HP0695 | JHP0633 | hyuA         | hydantoin utilization protein A , putative HYDANTOIN UTILIZATION                                          | Biosynthesis and Metabolism      |
| 7       | HP0696 | JHP0632 |              | N-methylhydantoinase, putative HYDANTOIN UTILIZATION                                                      | Biosynthesis and Metabolism      |
| 3       | HP0697 | JHP0631 |              |                                                                                                           | Unknown Hypothetical             |
| 2       | HP0698 | N/A     |              |                                                                                                           | Unknown Hypothetical             |
| 11      | HP0699 | JHP0639 |              |                                                                                                           | Unknown Hypothetical             |
| 0       | HP0700 | JHP0640 | dgkA         | diacylglycerol kinase                                                                                     | Biosynthesis and Metabolism      |
| 4       | HP0701 | JHP0641 | gyrA         | DNA gyrase, sub A , DNA GYRASE SUBUNIT A                                                                  | DNA/RNA Synthesis and Processing |
| 3       | HP0702 | JHP0642 |              |                                                                                                           | Unknown Hypothetical             |
| 12      | HP0703 | JHP0643 |              | response regulator, putative TRANSCRIPTIONAL REGULATOR                                                    | Regulation                       |
| 14      | HP0705 | JHP0644 | uvrA         | excinuclease ABC subunit A , EXCINUCLEASE ABC SUBUNIT A.                                                  | DNA/RNA Synthesis and Processing |



| Tn Hits | TIGR#  | ASTRA#  | Gene Name    | Gene Description                                                                               | Process                          |
|---------|--------|---------|--------------|------------------------------------------------------------------------------------------------|----------------------------------|
| 5       | HP0706 | JHP0645 | omp15 , hopE | outer membrane protein , Outer membrane protein/porin                                          | Outer Membrane Protein           |
| 0       | HP0707 | JHP0646 |              | conserved hypothetical protein                                                                 | Conserve Hypothetical            |
| 0       | HP0708 | JHP0647 |              |                                                                                                | Unknown Hypothetical             |
| 1       | HP0709 | JHP0648 |              | conserved hypothetical protein                                                                 | Conserve Hypothetical            |
| 4       | HP0710 | JHP0649 |              | conserved hypothetical protein, putative Outer membrane protein                                | Conserve Hypothetical            |
| 3       | HP0711 | JHP0650 |              |                                                                                                | Unknown Hypothetical             |
| 4       | HP0712 | JHP0651 |              |                                                                                                | Unknown Hypothetical             |
| 1       | HP0713 | JHP0651 |              |                                                                                                | Conserve Hypothetical            |
| 10      | HP0714 | JHP0652 | rpoN         | RNA polymerase sigma-54 factor                                                                 | Regulation                       |
| 5       | HP0715 | JHP0653 |              | ABC transporter, ATP-binding protein, putative abc transporter, ATP-binding protein            | Transporters                     |
| 0       | HP0716 | JHP0654 |              | conserved hypothetical protein                                                                 | Conserve Hypothetical            |
| 4       | HP0717 | JHP0655 | dnaX         | DNA polymerase III gamma and tau subunits , DNA POLYMERASE III SUBUNITS GAMMA AND TAU          | DNA/RNA Synthesis and Processing |
| 2       | HP0718 | JHP0656 |              | conserved hypothetical integral membrane protein                                               | Conserve Hypothetical            |
| 2       | HP0719 | JHP0657 |              |                                                                                                | Unknown Hypothetical             |
| 6       | HP0720 | JHP0657 |              |                                                                                                | Unknown Hypothetical             |
| 3       | HP0721 | JHP0658 |              |                                                                                                | Unknown Hypothetical             |
| 3       | HP0722 | JHP0659 |              | putative Outer membrane protein                                                                | Outer Membrane Protein           |
| 6       | HP0723 | JHP0661 | ansB         | L-asparaginase II                                                                              | Biosynthesis and Metabolism      |
| 12      | HP0724 | JHP0660 | dcuA         | anaerobic C4-dicarboxylate transport protein , ANAEROBIC C4-DICARBOXYLATE MEMBRANE TRANSPORTER | Transporters                     |
| 3       | HP0725 | JHP0662 |              | putative Outer membrane protein                                                                | Outer Membrane Protein           |
| 5       | HP0726 | JHP0663 |              | putative Outer membrane protein                                                                | Outer Membrane Protein           |
| 5       | HP0727 | JHP0664 |              | transcriptional regulator, putative, putative TRANSCRIPTIONAL REGULATOR                        | Regulation                       |
| 6       | HP0728 | JHP0665 |              | conserved hypothetical protein                                                                 | Conserve Hypothetical            |
| 0       | HP0729 | JHP0666 |              |                                                                                                | Unknown Hypothetical             |
| 1       | HP0730 | JHP0667 |              |                                                                                                | Unknown Hypothetical             |
| 2       | HP0731 | JHP0668 |              |                                                                                                | Unknown Hypothetical             |
| 4       | HP0733 | JHP0670 |              |                                                                                                | Unknown Hypothetical             |
| 3       | HP0734 | JHP0671 |              | conserved hypothetical protein                                                                 | Conserve Hypothetical            |
| 3       | HP0735 | JHP0672 | gpt          | xanthine guanine phosphoribosyl transferase , XANTHINE-GUANINE PHOSPHORIBOSYLTRANSFERASE       | Biosynthesis and Metabolism      |
| 0       | HP0736 | JHP0673 | serC         | phosphoserine aminotransferase , putative aminotransferase                                     | Biosynthesis and Metabolism      |

| Tn Hits | TIGR#  | ASTRA#  | Gene Name    | Gene Description                                                                          | Process                     |
|---------|--------|---------|--------------|-------------------------------------------------------------------------------------------|-----------------------------|
| 0       | HP0737 | JHP0674 | pgpA         | conserved hypothetical integral membrane protein, PHOSPHATIDYLGLYCEROPHOSPHATA SE A       | Conserve Hypothetical       |
| 0       | HP0738 | JHP0675 | ddlA, ddl    | D-alanine:D-alanine ligase A , D-ALANINE--D-ALANINE LIGASE                                | Cell Envelope               |
| 5       | HP0739 | JHP0676 |              | 2-hydroxy-6-oxohepta-2,4-dienoate hydrolase                                               | Other                       |
| 0       | HP0740 | JHP0677 | murF         | UDP-MurNac-pentapeptide presynthetase , D-ALANYL-D-ALANINE-ADDING ENZYME                  | Cell Envelope               |
| 1       | HP0741 | JHP0678 |              | conserved hypothetical protein, HIT FAMILY PROTEIN                                        | Conserve Hypothetical       |
| 0       | HP0742 | JHP0679 | prsA         | phosphoribosylpyrophosphate synthetase , PHOSPHORIBOSYL PYROPHOSPHATE SYNTHETASE          | Biosynthesis and Metabolism |
| 1       | HP0743 | JHP0680 | mreB, rodA_1 | rod shape-determining protein , putative ROD SHAPE-DETERMINING PROTEIN                    | Cell Envelope               |
| 2       | HP0744 | JHP0681 |              |                                                                                           | Unknown Hypothetical        |
| 0       | HP0745 | JHP0682 |              | conserved hypothetical protein                                                            | Conserve Hypothetical       |
| 0       | HP0746 | JHP0683 |              |                                                                                           | Unknown Hypothetical        |
| 2       | HP0747 | JHP0684 |              | conserved hypothetical protein                                                            | Conserve Hypothetical       |
| 0       | HP0748 | JHP0685 | ftsE         | cell division protein , putative abc transporter, ATP-binding protein                     | Cell Division               |
| 0       | HP0749 | JHP0686 | ftsX         | cell division membrane protein                                                            | Cell Division               |
| 0       | HP0750 | JHP0687 |              |                                                                                           | Unknown Hypothetical        |
| 9       | HP0751 | JHP0688 | flaG         | polar flagellin , putative FLAGELLIN PROTEIN                                              | Motility                    |
| 7       | HP0752 | JHP0689 | fliD         | flagellar hook-associated protein 2 , putative FLAGELLAR HOOK-ASSOCIATED PROTEIN 2 (HAP2) | Motility                    |
| 4       | HP0753 | JHP0690 | fliS         | flagellar protein , putative FLAGELLAR PROTEIN                                            | Motility                    |
| 3       | HP0754 | JHP0691 |              |                                                                                           | Unknown Hypothetical        |
| 3       | HP0755 | JHP0692 | moeB         | molybdopterin biosynthesis protein                                                        | Biosynthesis and Metabolism |
| 3       | HP0756 | JHP0693 |              |                                                                                           | Unknown Hypothetical        |
| 3       | HP0757 | JHP0694 |              | beta-alanine synthetase homolog                                                           | Biosynthesis and Metabolism |
| 4       | HP0758 | JHP0695 |              | conserved hypothetical integral membrane protein                                          | Conserve Hypothetical       |
| 4       | HP0759 | JHP0696 |              | conserved hypothetical integral membrane protein                                          | Conserve Hypothetical       |
| 0       | HP0760 | JHP0697 |              | conserved hypothetical protein                                                            | Conserve Hypothetical       |
| 0       | HP0761 | JHP0698 |              |                                                                                           | Unknown Hypothetical        |
| 3       | HP0762 | JHP0699 |              |                                                                                           | Unknown Hypothetical        |
| 0       | HP0763 | JHP0700 | ftsY         | cell division protein , FUNCTIONAL HOMOLOG OF SRP RECEPTOR                                | Cell Division               |
| 1       | HP0764 | JHP0701 | JHP0702      |                                                                                           | Unknown Hypothetical        |

| Tn Hits | TIGR#  | ASTRA#  | Gene Name    | Gene Description                                                                                             | Process                          |
|---------|--------|---------|--------------|--------------------------------------------------------------------------------------------------------------|----------------------------------|
| 0       | HP0767 | N/A     |              |                                                                                                              | Unknown Hypothetical             |
| 3       | HP0768 | JHP0705 | moaA         | molybdenum cofactor biosynthesis protein A , MOLYBDOPTERIN COFACTOR BIOSYNTHETIC PROTEIN                     | Biosynthesis and Metabolism      |
| 1       | HP0769 | JHP0706 | mobA         | molybdopterin-guanine dinucleotide biosynthesis protein A                                                    | Biosynthesis and Metabolism      |
| 2       | HP0770 | JHP0707 | flhB, flhB_1 | flagellar biosynthetic protein , FLAGELLAR BIOSYNTHESIS PROTEIN                                              | Motility                         |
| 3       | HP0771 | JHP0708 |              |                                                                                                              | Unknown Hypothetical             |
| 5       | HP0772 | JHP0709 | amiA         | N-acetylmuramoyl-L-alanine amidase , putative PROBABLE N-ACETYLMURAMOYL-L-ALANINE AMIDASE                    | Cell Envelope                    |
| 0       | HP0773 | JHP0710 |              |                                                                                                              | Unknown Hypothetical             |
| 4       | HP0774 | JHP0711 | tyrS         | tyrosyl-tRNA synthetase                                                                                      | Protein Synthesis and Processing |
| 0       | HP0775 | JHP0712 | spoT         | penta-phosphate guanosine-3'-pyrophosphohydrolase , GUANOSINE-3',5'-BIS(DIPHOSPHATE) 3'-PYROPHOSPHOHYDROLASE | Regulation                       |
| 0       | HP0776 | JHP0713 |              |                                                                                                              | Unknown Hypothetical             |
| 12      | HP0777 | JHP0714 | pyrH         | uridine 5'-monophosphate (UMP) kinase, URIDYLATE KINASE                                                      | Biosynthesis and Metabolism      |
| 11      | HP0778 | JHP0715 |              |                                                                                                              | Unknown Hypothetical             |
| 2       | HP0779 | JHP0716 | acnB         | aconitase B , ACONITATE HYDRATASE                                                                            | Biosynthesis and Metabolism      |
| 1       | HP0780 | JHP0717 |              |                                                                                                              | Unknown Hypothetical             |
| 1       | HP0781 | JHP0718 |              |                                                                                                              | Unknown Hypothetical             |
| 6       | HP0782 | JHP0719 |              | putative Outer membrane protein                                                                              | Outer Membrane Protein           |
| 7       | HP0783 | JHP0720 |              |                                                                                                              | Unknown Hypothetical             |
| 0       | HP0785 | JHP0722 |              | conserved hypothetical secreted protein                                                                      | Conserve Hypothetical            |
| 5       | HP0786 | JHP0723 | secA         | preprotein translocase subunit                                                                               | Protein Synthesis and Processing |
| 2       | HP0787 | JHP0724 |              | conserved hypothetical integral membrane protein                                                             | Conserve Hypothetical            |
| 4       | HP0788 | JHP0725 |              | putative Outer membrane protein                                                                              | Outer Membrane Protein           |
| 3       | HP0789 | N/A     |              |                                                                                                              | Unknown Hypothetical             |
| 5       | HP0790 | N/A     | prfB         | anti-codon nuclease masking agent                                                                            | DNA/RNA Synthesis and Processing |
| 0       | HP0791 | JHP0727 | cadA, hmcT   | cadmium-transporting ATPase, P-type , putative HEAVY-METAL CATION-TRANSPORTING P-TYPE ATPASE                 | Transporters                     |
| 4       | HP0792 | JHP0728 |              | sigma-54 interacting protein                                                                                 | Regulation                       |
| 0       | HP0793 | JHP0729 | def          | polypeptide deformylase                                                                                      | Protein Synthesis and Processing |
| 1       | HP0794 | JHP0730 | clpP         | ATP-dependent clp protease proteolytic component , ATP-DEPENDENT PROTEASE, PROTEOLYTIC SUBUNIT               | Protein Synthesis and Processing |

| Tn Hits | TIGR#  | ASTRA#  | Gene Name         | Gene Description                                                                                                                           | Process                          |
|---------|--------|---------|-------------------|--------------------------------------------------------------------------------------------------------------------------------------------|----------------------------------|
| 3       | HP0795 | JHP0731 | tig               | trigger factor                                                                                                                             | Protein Synthesis and Processing |
| 7       | HP0796 | JHP0732 | omp18             | outer membrane protein , putative Outer membrane protein                                                                                   | Outer Membrane Protein           |
| 1       | HP0797 | JHP0733 | hpaA              | flagellar sheath adhesin hpaA, NEURAMINYLLACTOSE-BINDING HEMAGGLUTININ PRECURSOR                                                           | Motility                         |
| 0       | HP0798 | JHP0734 | moaC              | molybdenum cofactor biosynthesis protein C                                                                                                 | Biosynthesis and Metabolism      |
| 0       | HP0799 | JHP0735 | mog               | molybdopterin biosynthesis protein                                                                                                         | Biosynthesis and Metabolism      |
| 2       | HP0800 | JHP0736 | moaE              | molybdopterin converting factor, subunit 2                                                                                                 | Biosynthesis and Metabolism      |
| 1       | HP0801 | JHP0737 | moaD              | molybdopterin converting factor, subunit 1 , putative MOLYBDOPTERIN CONVERTING FACTOR, SUBUNIT 1                                           | Biosynthesis and Metabolism      |
| 5       | HP0802 | JHP0738 | ribA              | GTP cyclohydrolase II                                                                                                                      | Biosynthesis and Metabolism      |
| 6       | HP0803 | JHP0739 |                   |                                                                                                                                            | Unknown Hypothetical             |
| 5       | HP0804 | JHP0740 | ribA, ribB, ribBA | GTP cyclohydrolase II/3,4-dihydroxy-2-butanone 4-phosphate synthase , GTP CYCLOHYDROLASE II/3,4-DIHYDROXY-2-BUTANONE 4- PHOSPHATE SYNTHASE | Biosynthesis and Metabolism      |
| 4       | HP0805 | JHP0741 | lex2B             | lipooligosaccharide 5G8 epitope biosynthesis-associated protein , putative lipopolysaccharide biosynthesis protein                         | Cell Envelope                    |
| 6       | HP0806 | JHP0742 |                   |                                                                                                                                            | Unknown Hypothetical             |
| 0       | HP0807 | JHP0743 | fecA, fecA_2      | iron(III) dicitrate transport protein                                                                                                      | Transporters                     |
| 3       | HP0808 | JHP0744 | acpS              | holo-acp synthase , HOLO-ACYL CARRIER PROTEIN SYNTHASE                                                                                     | Biosynthesis and Metabolism      |
| 0       | HP0809 | JHP0745 | fliL              | putative FLAGELLAR BIOSYNTHESIS PROTEIN                                                                                                    | Motility                         |
| 5       | HP0810 | JHP0746 |                   | conserved hypothetical protein                                                                                                             | Conserve Hypothetical            |
| 0       | HP0811 | JHP0747 |                   |                                                                                                                                            | Unknown Hypothetical             |
| 1       | HP0812 | JHP0748 |                   |                                                                                                                                            | Unknown Hypothetical             |
| 1       | HP0813 | JHP0749 |                   | conserved hypothetical protein                                                                                                             | Conserve Hypothetical            |
| 1       | HP0814 | JHP0750 | thiF, moeB        | thiamin biosynthesis protein , MOLYBDOPTERIN-SYNTHASE SULFURYLASE                                                                          | Biosynthesis and Metabolism      |
| 7       | HP0816 | JHP0752 | motB              | flagellar motor rotation protein , FLAGELLAR MOTOR PROTEIN                                                                                 | Motility                         |
| 5       | HP0817 | JHP0753 |                   |                                                                                                                                            | Unknown Hypothetical             |
| 4       | HP0818 | JHP0754 | proWX             | osmoprotection protein                                                                                                                     | Transporters                     |
| 2       | HP0819 | JHP0758 | proV              | osmoprotection protein , osmoprotection ATP-binding protein                                                                                | Transporters                     |

| Tn Hits | TIGR#  | ASTRA#  | Gene Name    | Gene Description                                                                                                   | Process                          |
|---------|--------|---------|--------------|--------------------------------------------------------------------------------------------------------------------|----------------------------------|
| 0       | HP0820 | JHP0759 |              |                                                                                                                    | Unknown Hypothetical             |
| 4       | HP0821 | JHP0760 | uvrC         | excinuclease ABC subunit C                                                                                         | DNA/RNA Synthesis and Processing |
| 4       | HP0822 | JHP0761 | metL, hom    | homoserine dehydrogenase                                                                                           | Biosynthesis and Metabolism      |
| 1       | HP0823 | JHP0762 |              | conserved hypothetical protein                                                                                     | Conserve Hypothetical            |
| 1       | HP0824 | JHP0763 | trxA         | thioredoxin                                                                                                        | Biosynthesis and Metabolism      |
| 4       | HP0825 | JHP0764 | trxB, trxB_1 | thioredoxin reductase                                                                                              | Biosynthesis and Metabolism      |
| 2       | HP0826 | JHP0765 | lex2B        | lipooligosaccharide 5G8 epitope biosynthesis-associated protein , putative lipopolysaccharide biosynthesis protein | Cell Envelope                    |
| 1       | HP0827 | JHP0766 |              | ss-DNA binding protein 12RNP2 precursor                                                                            | Other                            |
| 2       | HP0828 | JHP0767 | atpB         | ATP synthase F0, subunit a                                                                                         | Biosynthesis and Metabolism      |
| 7       | HP0829 | JHP0768 | guaB         | inosine-5'-monophosphate dehydrogenase                                                                             | Biosynthesis and Metabolism      |
| 12      | HP0830 | JHP0769 | gatA         | Glu-tRNA(Gln) amidotransferase, subunit A , GLU-TRNA AMIDOTRANSFERASE, SUBUNIT A                                   | Protein Synthesis and Processing |
| 0       | HP0831 | JHP0770 |              | conserved hypothetical ATP binding protein                                                                         | Conserve Hypothetical            |
| 3       | HP0832 | JHP0771 | speE         | spermidine synthase , putative spermidine synthase                                                                 | Biosynthesis and Metabolism      |
| 3       | HP0833 | JHP0772 |              |                                                                                                                    | Unknown Hypothetical             |
| 7       | HP0834 | JHP0773 | yphC         | GTP-binding protein homologue                                                                                      | Conserved Hypothetical           |
| 0       | HP0835 | JHP0774 | hup          | histone-like DNA-binding protein HU , DNA-BINDING PROTEIN HU                                                       | Protein Synthesis and Processing |
| 1       | HP0836 | JHP0775 |              |                                                                                                                    | Unknown Hypothetical             |
| 1       | HP0837 | JHP0775 |              |                                                                                                                    | Unknown Hypothetical             |
| 2       | HP0838 | JHP0776 |              |                                                                                                                    | Unknown Hypothetical             |
| 6       | HP0839 | JHP0777 | ompP1        | outer membrane protein P1 , putative Outer membrane protein                                                        | Outer Membrane Protein           |
| 2       | HP0840 | JHP0778 |              | flaA1 protein, putative SUGAR NUCLEOTIDE BIOSYNTHESIS PROTEIN                                                      | Motility                         |
| 1       | HP0841 | JHP0779 | dfp          | pantothenate metabolism flavoprotein                                                                               | Biosynthesis and Metabolism      |
| 2       | HP0842 | JHP0780 |              |                                                                                                                    | Unknown Hypothetical             |
| 4       | HP0843 | JHP0781 | thiB, thiE   | thiamin phosphate pyrophosphorylase/hydroxyethylthiazole kinase , THIAMINE PHOSPHATE PYROPHOSPHORYLASE             | Biosynthesis and Metabolism      |

| Tn Hits | TIGR#  | ASTRA#  | Gene Name    | Gene Description                                                                                    | Process                          |
|---------|--------|---------|--------------|-----------------------------------------------------------------------------------------------------|----------------------------------|
| 2       | HP0844 | JHP0782 | thi, thiD    | thiamine biosynthesis protein , PHOSPHOMETHYLPYRIMIDINE KINASE                                      | Biosynthesis and Metabolism      |
| 1       | HP0845 | JHP0783 | thiM         | thiamin phosphate pyrophosphorylase/hydroxyethylthiazole kinase , HYDROXYETHYLTHIAZOLE KINASE       | Biosynthesis and Metabolism      |
| 5       | HP0846 | JHP0784 | hsdR, hsdR_2 | type I restriction enzyme R protein , TYPE I RESTRICTION ENZYME (RESTRICTION SUBUNIT)               | Restriction Modification         |
| 0       | HP0849 | JHP0785 |              |                                                                                                     | Unknown Hypothetical             |
| 2       | HP0850 | JHP0786 | hsdM, hsdM_2 | type I restriction enzyme M protein , TYPE I RESTRICTION ENZYME (MODIFICATION SUBUNIT)              | Restriction Modification         |
| 0       | HP0851 | JHP0787 |              | conserved hypothetical integral membrane protein                                                    | Conserve Hypothetical            |
| 0       | HP0852 | JHP0788 |              |                                                                                                     | Unknown Hypothetical             |
| 2       | HP0853 | JHP0789 | yheS         | ABC transporter, ATP-binding protein , putative abc transporter, ATP-binding protein                | Transporters                     |
| 0       | HP0854 | JHP0790 | guaC         | GMP reductase                                                                                       | Biosynthesis and Metabolism      |
| 3       | HP0857 | JHP0791 | gmhA         | phosphoheptose isomerase                                                                            | Cell Envelope                    |
| 0       | HP0858 | JHP0792 | rfaE, waaE   | ADP-heptose synthase , putative ADP-D-glycero-D-mannoheptose synthase                               | Cell Envelope                    |
| 2       | HP0859 | JHP0793 | rfaD, gmhD   | ADP-L-glycero-D-mannoheptose-6-epimerase                                                            | Cell Envelope                    |
| 0       | HP0860 | JHP0794 |              | conserved hypothetical protein                                                                      | Conserve Hypothetical            |
| 3       | HP0861 | JHP0795 |              |                                                                                                     | Unknown Hypothetical             |
| 4       | HP0862 | JHP0796 |              |                                                                                                     | Unknown Hypothetical             |
| 3       | HP0863 | JHP0797 |              |                                                                                                     | Unknown Hypothetical             |
| 1       | HP0864 | JHP0798 |              |                                                                                                     | Unknown Hypothetical             |
| 3       | HP0865 | JHP0799 | dut          | deoxyuridine 5'-triphosphate nucleotidohydrolase                                                    | Biosynthesis and Metabolism      |
| 0       | HP0866 | JHP0800 | greA         | transcription elongation factor GreA , TRANSCRIPTION ELONGATION FACTOR (TRANSCRIPT CLEAVAGE FACTOR) | DNA/RNA Synthesis and Processing |
| 1       | HP0867 | JHP0801 | lpxB         | lipid A disaccharide synthetase , LIPID-A-DISACCHARIDE SYNTHASE                                     | Cell Envelope                    |
| 0       | HP0868 | JHP0802 |              |                                                                                                     | Unknown Hypothetical             |
| 1       | HP0869 | JHP0803 | hypA         | hydrogenase expression/formation protein                                                            | Biosynthesis and Metabolism      |
| 10      | HP0870 | JHP0804 | flgE         | flagellar hook , FLAGELLAR HOOK PROTEIN                                                             | Motility                         |
| 1       | HP0871 | JHP0805 | cdh          | CDP-diglyceride hydrolase , CDP-DIACYLGLYCEROL PYROPHOSPHATASE                                      | Biosynthesis and Metabolism      |

| Tn Hits | TIGR#  | ASTRA#  | Gene Name    | Gene Description                                                                                                   | Process                          |
|---------|--------|---------|--------------|--------------------------------------------------------------------------------------------------------------------|----------------------------------|
| 2       | HP0872 | JHP0806 | phnA         | alkylphosphonate uptake protein , putative ALKYLPHOSPHONATE UPTAKE PROTEIN                                         | Conserved Hypothetical           |
| 1       | HP0873 | JHP0807 |              |                                                                                                                    | Unknown Hypothetical             |
| 3       | HP0874 | JHP0808 |              |                                                                                                                    | Unknown Hypothetical             |
| 3       | HP0875 | JHP0809 | katA         | catalase                                                                                                           | Detoxification                   |
| 4       | HP0876 | JHP0810 | frpB, frpB_1 | iron-regulated outer membrane protein , putative IRON-REGULATED OUTER MEMBRANE PROTEIN                             | Transporters                     |
| 2       | HP0877 | JHP0811 | ruvC         | Holliday junction endodeoxyribonuclease , CROSSOVER JUNCTION ENDODEOXYRIBONUCLEASE                                 | DNA/RNA Synthesis and Processing |
| 2       | HP0878 | JHP0812 |              |                                                                                                                    | Unknown Hypothetical             |
| 3       | HP0879 | JHP0812 |              |                                                                                                                    | Unknown Hypothetical             |
| 0       | HP0880 | N/A     |              |                                                                                                                    | Unknown Hypothetical             |
| 2       | HP0883 | JHP0815 | ruvA         | Holliday junction DNA helicase                                                                                     | DNA/RNA Synthesis and Processing |
| 12      | HP0884 | JHP0816 |              |                                                                                                                    | Unknown Hypothetical             |
| 2       | HP0885 | JHP0817 | mviN         | virulence factor mviN protein                                                                                      | Other                            |
| 1       | HP0886 | JHP0818 | cysS         | cysteinyI-tRNA synthetase                                                                                          | Protein Synthesis and Processing |
| 6       | HP0887 | JHP0819 | vacA         | vacuolating cytotoxin                                                                                              | Outer Membrane Protein           |
| 4       | HP0888 | JHP0821 | fecE         | iron(III) dicitrate ABC transporter, ATP-binding protein, IRON(III) DICITRATE TRANSPORT SYSTEM ATP-BINDING PROTEIN | Transporters                     |
| 9       | HP0889 | JHP0822 | fecD         | iron(III) dicitrate ABC transporter, permease protein , IRON(III) DICITRATE TRANSPORT SYSTEM PERMEASE PROTEIN      | Transporters                     |
| 6       | HP0890 | JHP0823 |              | conserved hypothetical protein                                                                                     | Conserve Hypothetical            |
| 3       | HP0891 | JHP0824 |              | conserved hypothetical protein                                                                                     | Conserve Hypothetical            |
| 1       | HP0892 | JHP0831 |              | conserved hypothetical protein                                                                                     | Conserve Hypothetical            |
| 3       | HP0893 | JHP0832 |              |                                                                                                                    | Unknown Hypothetical             |
| 3       | HP0895 | N/A     |              |                                                                                                                    | Unknown Hypothetical             |
| 1       | HP0896 | JHP1164 | omp19 , babB | outer membrane protein , outer membrane protein - adhesin                                                          | Outer Membrane Protein           |
| 2       | HP0897 | N/A     |              |                                                                                                                    | Unknown Hypothetical             |
| 2       | HP0898 | JHP0835 | hypD         | hydrogenase expression/formation protein                                                                           | Biosynthesis and Metabolism      |
| 2       | HP0899 | JHP0836 | hypC         | hydrogenase expression/formation protein                                                                           | Biosynthesis and Metabolism      |
| 2       | HP0900 | JHP0837 | hypB         | hydrogenase expression/formation protein                                                                           | Biosynthesis and Metabolism      |
| 1       | HP0901 | JHP0838 |              |                                                                                                                    | Unknown Hypothetical             |
| 4       | HP0902 | JHP0839 |              |                                                                                                                    | Unknown Hypothetical             |
| 4       | HP0907 | JHP0843 | flgD         | hook assembly protein, flagella , putative FLAGELLAR BIOSYNTHESIS PROTEIN                                          | Motility                         |

| Tn Hits | TIGR#  | ASTRA#    | Gene Name    | Gene Description                                                                                | Process                          |
|---------|--------|-----------|--------------|-------------------------------------------------------------------------------------------------|----------------------------------|
| 11      | HP0908 | JHP0844   | flgE         | flagellar hook , putative FLAGELLAR BASAL-BODY/ROD/HOOKPROTEIN                                  | Motility                         |
| 6       | HP0909 | JHP0845   |              |                                                                                                 | Unknown Hypothetical             |
| 7       | HP0910 | JHP0846   | HINDII M     | adenine specific DNA methyltransferase , TYPE II DNA MODIFICATION ENZYME (METHYLTRANSFERASE)    | Restiction Modification          |
| 5       | HP0911 | JHP0847   | rep          | rep helicase, single-stranded DNA-dependent ATPase , putative ATP-DEPENDENT HELICASE            | DNA/RNA Synthesis and Processing |
| 10      | HP0912 | JHP0848   | omp20 , hopC | outer membrane protein , Outer membrane protein/porin                                           | Outer Membrane Protein           |
| 9       | HP0913 | JHP0849   | omp21 , hopB | outer membrane protein , Outer membrane protein/porin                                           | Outer Membrane Protein           |
| 6       | HP0914 | JHP0850   |              | putative Outer membrane protein                                                                 | Outer Membrane Protein           |
| 5       | HP0915 | JHP0851   | frpB, frpB_2 | iron-regulated outer membrane protein , putative IRON-REGULATED OUTER MEMBRANE PROTEIN          | Transporters                     |
| 7       | HP0916 | JHP0851   | frpB         | iron-regulated outer membrane protein                                                           | Transporters                     |
| 5       | HP0917 | N/A       |              |                                                                                                 | Unknown Hypothetical             |
| 2       | HP0918 | JHP0852   |              |                                                                                                 | Unknown Hypothetical             |
| 4       | HP0919 | JHP0853   | pyrAb, carB  | carbamoyl-phosphate synthase (glutamine-hydrolysing) , CARBAMOYL-PHOSPHATE SYNTHASE LARGE CHAIN | Biosynthesis and Metabolism      |
| 0       | HP0920 | JHP0854   |              | conserved hypothetical integral membrane protein                                                | Conserve Hypothetical            |
| 2       | HP0921 | JHP0855   | gap, gap_1   | glyceraldehyde-3-phosphate dehydrogenase , GLYCERALDEHYDE 3-PHOSPHATE DEHYDROGENASE             | Biosynthesis and Metabolism      |
| 1       | HP0922 | JHP0856   |              | toxin-like outer membrane protein, putative vacuolating cytotoxin (VacA) paralog                | Outer Membrane Protein           |
| 3       | HP0923 | JHP0857   | omp22        | outer membrane protein , putative Outer membrane protein                                        | Outer Membrane Protein           |
| 2       | HP0924 | JHP0858   | dmpl         | 4-oxalocrotonate tautomerase                                                                    | Other                            |
| 3       | HP0925 | JHP0859   | recR         | recombinational DNA repair protein , RECOMBINATION PROTEIN                                      | DNA/RNA Synthesis and Processing |
| 3       | HP0926 | JHP0860   |              | conserved hypothetical protein                                                                  | Conserve Hypothetical            |
| 0       | HP0927 | JHP0861   | htpX         | heat shock protein , stress protein                                                             | Other                            |
| 0       | HP0928 | JHP062 JH | folE         | GTP cyclohydrolase I                                                                            | Biosynthesis and Metabolism      |
| 0       | HP0929 | JHP0864   | ispA         | geranyltranstransferase                                                                         | Biosynthesis and Metabolism      |
| 2       | HP0930 | JHP0865   | surE         | stationary-phase survival protein , STATIONARY PHASE PROTEIN                                    | Other                            |
| 0       | HP0931 | JHP0866   |              |                                                                                                 | Unknown Hypothetical             |
| 0       | HP0932 | JHP0866   |              |                                                                                                 | Unknown Hypothetical             |



| Tn Hits | TIGR#  | ASTRA#  | Gene Name  | Gene Description                                                                                                         | Process                          |
|---------|--------|---------|------------|--------------------------------------------------------------------------------------------------------------------------|----------------------------------|
| 2       | HP0933 | JHP0867 |            |                                                                                                                          | Unknown Hypothetical             |
| 2       | HP0934 | JHP0868 |            | conserved hypothetical protein                                                                                           | Conserve Hypothetical            |
| 0       | HP0935 | JHP0869 |            |                                                                                                                          | Unknown Hypothetical             |
| 2       | HP0936 | JHP0871 | proP       | proline/betaine transporter                                                                                              | Transporters                     |
| 3       | HP0937 | JHP0872 |            |                                                                                                                          | Unknown Hypothetical             |
| 7       | HP0938 | JHP0873 |            |                                                                                                                          | Unknown Hypothetical             |
| 6       | HP0939 | JHP0874 | yckJ       | amino acid ABC transporter, permease protein , putative AMINO ACID ABC TRANSPORTER, PERMEASE PROTEIN                     | Transporters                     |
| 2       | HP0940 | JHP0875 | yckK       | amino acid ABC transporter, periplasmic binding protein , putative AMINO ACID ABC TRANSPORTER, BINDING PROTEIN PRECURSOR | Transporters                     |
| 0       | HP0941 | JHP0876 | alr        | alanine racemase, biosynthetic , ALANINE RACEMASE                                                                        | Biosynthesis and Metabolism      |
| 3       | HP0942 | JHP0877 | dagA       | D-alanine glycine permease , putative SODIUM/ALANINE SYMPORTER                                                           | Transporters                     |
| 13      | HP0943 | JHP0878 | dadA       | D-amino acid dehydrogenase                                                                                               | Biosynthesis and Metabolism      |
| 1       | HP0944 | JHP0879 |            | conserved hypothetical protein                                                                                           | Protein Synthesis and Processing |
| 5       | HP0946 | JHP0880 |            | conserved hypothetical integral membrane protein                                                                         | Conserve Hypothetical            |
| 2       | HP0947 | JHP0881 |            |                                                                                                                          | Unknown Hypothetical             |
| 1       | HP0948 | JHP0882 |            |                                                                                                                          | Unknown Hypothetical             |
| 1       | HP0949 | JHP0883 |            | conserved hypothetical secreted protein                                                                                  | Conserve Hypothetical            |
| 1       | HP0950 | JHP0884 | accD       | acetyl-CoA carboxylase beta subunit , ACETYL-COENZYME A CARBOXYLASE SUBUNIT B                                            | Biosynthesis and Metabolism      |
| 3       | HP0951 | JHP0885 |            |                                                                                                                          | Unknown Hypothetical             |
| 2       | HP0952 | JHP0886 |            | conserved hypothetical integral membrane protein                                                                         | Conserve Hypothetical            |
| 2       | HP0953 | JHP0887 |            |                                                                                                                          | Unknown Hypothetical             |
| 6       | HP0954 | JHP0888 |            | oxygen-insensitive NAD(P)H nitroreductase, putative aldehyde dehydrogenase                                               | Biosynthesis and Metabolism      |
| 2       | HP0955 | JHP0889 | lgt        | prolipoprotein diacylglyceryl transferase , putative PROLIPOPROTEIN DIACYLGLYCERYL TRANSFERASE                           | Outer Membrane Protein           |
| 0       | HP0956 | JHP0890 |            | conserved hypothetical protein                                                                                           | Conserve Hypothetical            |
| 0       | HP0957 | JHP0891 | kdtA, waaA | 3-deoxy-d-manno-octulosonic-acid transferase                                                                             | Cell Envelope                    |
| 1       | HP0958 | JHP0892 |            |                                                                                                                          | Unknown Hypothetical             |
| 0       | HP0959 | JHP0893 |            | conserved hypothetical protein                                                                                           | Conserve Hypothetical            |
| 4       | HP0960 | JHP0894 | glyQ       | glycyl-tRNA synthetase, alpha subunit , GLYCYL-TRNA SYNTHETASE ALPHA CHAIN                                               | Protein Synthesis and Processing |

| Tn Hits | TIGR#  | ASTRA#  | Gene Name    | Gene Description                                                                                 | Process                          |
|---------|--------|---------|--------------|--------------------------------------------------------------------------------------------------|----------------------------------|
| 5       | HP0961 | JHP0895 | gpsA         | glycerol-3-phosphate dehydrogenase, NAD(P)+ dependent, GLYCEROL-3-PHOSPHATE DEHYDROGENASE (NAD+) | Biosynthesis and Metabolism      |
| 2       | HP0962 | N/A     | acpP         | acyl carrier protein                                                                             | Biosynthesis and Metabolism      |
| 0       | HP0963 | JHP0897 |              |                                                                                                  | Unknown Hypothetical             |
| 1       | HP0965 | JHP0899 |              |                                                                                                  | Unknown Hypothetical             |
| 4       | HP0966 | JHP0900 | JHP0901      | conserved hypothetical protein                                                                   | Conserve Hypothetical            |
| 0       | HP0968 | JHP0902 |              |                                                                                                  | Unknown Hypothetical             |
| 6       | HP0969 | JHP0903 | czcA, czcA_1 | cation efflux system protein , putative cation efflux system protein                             | Transporters                     |
| 5       | HP0970 | JHP0904 | nccB, czcB_1 | nickel-cobalt-cadmium resistance protein , putative cation efflux system protein                 | Other                            |
| 6       | HP0971 | JHP0905 |              |                                                                                                  | Unknown Hypothetical             |
| 5       | HP0972 | JHP0906 | glyS         | glycyl-tRNA synthetase, beta subunit , GLYCYL-TRNA SYNTHETASE BETA CHAIN                         | Protein Synthesis and Processing |
| 0       | HP0973 | JHP0907 |              |                                                                                                  | Unknown Hypothetical             |
| 1       | HP0974 | JHP0908 | pgm          | phosphoglycerate mutase , 2,3-BISPHOSPHOGLYCERATE-INDEPENDENT PHOSPHOGLYCERATE MUTASE            | Biosynthesis and Metabolism      |
| 2       | HP0976 | JHP0910 | bioA         | adenosylmethionine-8-amino-7-oxononanoate aminotransferase                                       | Biosynthesis and Metabolism      |
| 1       | HP0977 | JHP0911 |              | conserved hypothetical secreted protein                                                          | Conserve Hypothetical            |
| 5       | HP0978 | JHP0912 | ftsA         | cell division protein, septum formation protein                                                  | Cell Division                    |
| 0       | HP0979 | JHP0913 | ftsZ         | cell divison protein , GTPase in circumferential ring formation                                  | Cell Division                    |
| 3       | HP0980 | N/A     |              | conserved hypothetical secreted protein                                                          | Conserve Hypothetical            |
| 2       | HP0981 | N/A     | xseA         | exonuclease VII-like protein                                                                     | Conserved Hypothetical           |
| 1       | HP0982 | N/A     |              |                                                                                                  | Unknown Hypothetical             |
| 4       | HP0983 | JHP0915 |              | conserved hypothetical integral membrane protein                                                 | Conserve Hypothetical            |
| 0       | HP0984 | N/A     |              |                                                                                                  | Unknown Hypothetical             |
| 4       | HP0985 | N/A     |              |                                                                                                  | Unknown Hypothetical             |
| 4       | HP0986 | N/A     |              |                                                                                                  | Unknown Hypothetical             |
| 5       | HP0988 | N/A     | tnpA         | IS605 transposase                                                                                | Transposon                       |
| 7       | HP0989 | N/A     | tnpB         | IS605 transposase                                                                                | Transposon                       |
| 0       | HP0993 | N/A     |              |                                                                                                  | Unknown Hypothetical             |
| 9       | HP0997 | N/A     | tnpB         | IS605 transposase                                                                                | Transposon                       |
| 12      | HP0998 | N/A     | tnpA         | IS605 transposase                                                                                | Transposon                       |
| 3       | HP0999 | N/A     |              |                                                                                                  | Unknown Hypothetical             |
| 6       | HP1000 | N/A     |              | PARA protein                                                                                     | Other                            |
| 5       | HP1001 | N/A     |              |                                                                                                  | Unknown Hypothetical             |
| 7       | HP1002 | N/A     |              |                                                                                                  | Unknown Hypothetical             |

| Tn Hits | TIGR#  | ASTRA#  | Gene Name    | Gene Description                                                                              | Process                          |
|---------|--------|---------|--------------|-----------------------------------------------------------------------------------------------|----------------------------------|
| 3       | HP1003 | N/A     |              |                                                                                               | Unknown Hypothetical             |
| 1       | HP1004 | N/A     |              |                                                                                               | Unknown Hypothetical             |
| 1       | HP1005 | N/A     |              |                                                                                               | Unknown Hypothetical             |
| 2       | HP1006 | N/A     | traG         | conjugal transfer protein                                                                     | Other                            |
| 3       | HP1009 | N/A     |              | site-specific recombinase                                                                     | DNA/RNA Synthesis and Processing |
| 4       | HP1010 | JHP0413 | ppk          | polyphosphate kinase                                                                          | Biosynthesis and Metabolism      |
| 1       | HP1011 | JHP0412 | pyrD         | dihydroorotate dehydrogenase                                                                  | Biosynthesis and Metabolism      |
| 0       | HP1012 | JHP0411 | pqqE         | protease , putative ZINC PROTEASE                                                             | Protein Synthesis and Processing |
| 0       | HP1013 | JHP0410 | dapA         | dihydrodipicolinate synthetase , DIHYDRODIPICOLINATE SYNTHASE                                 | Biosynthesis and Metabolism      |
| 4       | HP1014 | JHP0409 | hdhA         | 7-alpha-hydroxysteroid dehydrogenase , putative Short chain dehydrogenase                     | Biosynthesis and Metabolism      |
| 1       | HP1015 | JHP0408 |              |                                                                                               | Unknown Hypothetical             |
| 0       | HP1016 | JHP0407 | pgsA         | phosphatidylglycerophosphate synthase                                                         | Biosynthesis and Metabolism      |
| 0       | HP1017 | JHP0406 | rocE         | amino acid permease                                                                           | Transporters                     |
| 0       | HP1019 | JHP0405 | htrA         | serine protease , PROTEASE DO                                                                 | Protein Synthesis and Processing |
| 1       | HP1020 | JHP0404 |              | conserved hypothetical protein                                                                | Conserve Hypothetical            |
| 3       | HP1021 | JHP0403 |              | response regulator, putative TRANSCRIPTIONAL REGULATOR                                        | Regulation                       |
| 5       | HP1022 | JHP0402 |              |                                                                                               | Unknown Hypothetical             |
| 3       | HP1023 | JHP0401 |              |                                                                                               | Unknown Hypothetical             |
| 4       | HP1024 | JHP0400 | CbpA, dnaJ_1 | co-chaperone-curved DNA binding protein A , putative co-chaperone with DnaK                   | Chaperones                       |
| 17      | HP1025 | JHP0399 | hspR         | putative heat shock protein , putative TRANSCRIPTIONAL REGULATOR                              | Regulation                       |
| 9       | HP1026 | JHP0398 |              | conserved hypothetical helicase-like protein                                                  | Conserve Hypothetical            |
| 4       | HP1027 | JHP0397 | fur          | ferric uptake regulation protein                                                              | Regulation                       |
| 2       | HP1028 | JHP0396 |              |                                                                                               | Unknown Hypothetical             |
| 3       | HP1029 | JHP0395 |              |                                                                                               | Unknown Hypothetical             |
| 11      | HP1030 | JHP0394 | fliY         | fliY protein , FLAGELLAR MOTOR SWITCH PROTEIN                                                 | Motility                         |
| 4       | HP1031 | JHP0393 | fliM         | flagellar motor switch protein                                                                | Motility                         |
| 10      | HP1032 | JHP0392 | fliA         | alternative transcription initiation factor, sigma-F , RNA POLYMERASE SIGMA FACTOR (sigma 28) | Regulation                       |
| 1       | HP1033 | JHP0391 |              |                                                                                               | Unknown Hypothetical             |
| 0       | HP1034 | JHP0390 | ylxH         | ATP-binding protein                                                                           | Other                            |
| 4       | HP1035 | JHP0389 | flhF         | flagellar biosynthesis protein , putative FLAGELLAR BIOSYNTHESIS PROTEIN                      | Motility                         |
| 1       | HP1036 | JHP0388 | folk         | 7, 8-dihydro-6-hydroxymethylpterin-pyrophosphokinase                                          | Biosynthesis and Metabolism      |

| Tn Hits | TIGR#  | ASTRA#  | Gene Name   | Gene Description                                                                                                | Process                          |
|---------|--------|---------|-------------|-----------------------------------------------------------------------------------------------------------------|----------------------------------|
| 2       | HP1037 | JHP0387 | pepQ        | conserved hypothetical protein, putative proline peptidase                                                      | Conserve Hypothetical            |
| 0       | HP1038 | JHP0386 | aroQ, aroD  | 3-dehydroquinase type II , 3-DEHYDROQUINATE DEHYDRATASE                                                         | Biosynthesis and Metabolism      |
| 1       | HP1039 | JHP0385 |             |                                                                                                                 | Unknown Hypothetical             |
| 0       | HP1040 | JHP0384 | rps15, rpsO | ribosomal protein S15 , 30S RIBOSOMAL PROTEIN S15                                                               | Protein Synthesis and Processing |
| 15      | HP1041 | JHP0383 | flhA        | flagellar biosynthesis protein                                                                                  | Motility                         |
| 1       | HP1042 | JHP0382 |             |                                                                                                                 | Unknown Hypothetical             |
| 2       | HP1043 | JHP0381 |             | response regulator, putative TRANSCRIPTIONAL REGULATOR                                                          | Regulation                       |
| 9       | HP1044 | JHP0380 |             | conserved hypothetical integral membrane protein                                                                | Conserve Hypothetical            |
| 11      | HP1045 | N/A     | acoE        | acetyl-CoA synthetase                                                                                           | Biosynthesis and Metabolism      |
| 1       | HP1046 | JHP0379 |             | conserved hypothetical protein                                                                                  | Conserve Hypothetical            |
| 0       | HP1047 | JHP0378 | rbfA        | ribosome-binding factor A , putative RIBOSOME-BINDING FACTOR A                                                  | Protein Synthesis and Processing |
| 2       | HP1048 | JHP0377 | infB        | translation initiation factor IF-2                                                                              | Protein Synthesis and Processing |
| 1       | HP1049 | JHP0376 |             | conserved hypothetical protein                                                                                  | Conserve Hypothetical            |
| 2       | HP1050 | JHP0375 | thrB        | homoserine kinase                                                                                               | Biosynthesis and Metabolism      |
| 1       | HP1051 | JHP0374 |             |                                                                                                                 | Unknown Hypothetical             |
| 0       | HP1052 | JHP0373 | envA, lpxC  | UDP-3-O-acyl N-acetylglucosamine deacetylase , UDP-3-O-[3-HYDROXYMYRISTOYL                                      | Cell Envelope                    |
| 0       | HP1053 | JHP0372 |             |                                                                                                                 | Unknown Hypothetical             |
| 0       | HP1054 | JHP0371 |             |                                                                                                                 | Unknown Hypothetical             |
| 0       | HP1055 | JHP0370 |             |                                                                                                                 | Unknown Hypothetical             |
| 0       | HP1056 | JHP0369 |             |                                                                                                                 | Unknown Hypothetical             |
| 0       | HP1057 | JHP0368 |             |                                                                                                                 | Unknown Hypothetical             |
| 0       | HP1058 | JHP0367 | panB        | 3-methyl-2-oxobutanoate hydroxymethyltransferase                                                                | Biosynthesis and Metabolism      |
| 0       | HP1059 | JHP0366 | ruvB        | Holliday junction DNA helicase , HOLLIDAY JUNCTION DNA HELICASE RUVB                                            | DNA/RNA Synthesis and Processing |
| 0       | HP1060 | JHP0365 |             |                                                                                                                 | Unknown Hypothetical             |
| 0       | HP1061 | JHP0364 |             | conserved hypothetical integral membrane protein                                                                | Conserve Hypothetical            |
| 1       | HP1062 | JHP0363 | queA        | S-adenosylmethionine:tRNA ribosyltransferase-isomerase , S-ADENOSYLMETHIONINE TRNA RIBOSYLTRANSFERASE-ISOMERASE | Protein Synthesis and Processing |
| 4       | HP1063 | JHP0362 | gidB        | glucose-inhibited division protein , GLUCOSE INHIBITED DIVISION PROTEIN B                                       | DNA/RNA Synthesis and Processing |
| 0       | HP1064 | JHP0361 |             |                                                                                                                 | Unknown Hypothetical             |
| 0       | HP1065 | JHP0360 |             |                                                                                                                 | Unknown Hypothetical             |

| Tn Hits | TIGR#  | ASTRA#  | Gene Name    | Gene Description                                                                           | Process                          |
|---------|--------|---------|--------------|--------------------------------------------------------------------------------------------|----------------------------------|
| 2       | HP1066 | JHP0359 |              | conserved hypothetical protein, putative Outer membrane protein                            | Conserve Hypothetical            |
| 0       | HP1067 | JHP0358 | cheY         | chemotaxis protein , response regulator                                                    | Motility                         |
| 5       | HP1068 | JHP0357 | prmA         | ribosomal protein L11 methyltransferase , putative RIBOSOMAL PROTEIN L11 METHYLTRANSFERASE | Protein Synthesis and Processing |
| 0       | HP1069 | JHP0356 | ftsH, ftsH_2 | cell division protein , ATP-DEPENDENT ZINC METALLOPEPTIDASE                                | Cell Division                    |
| 0       | HP1070 | JHP0355 |              |                                                                                            | Unknown Hypothetical             |
| 1       | HP1071 | JHP0354 | pssA         | phosphatidylserine synthase                                                                | Biosynthesis and Metabolism      |
| 5       | HP1072 | JHP0353 | copA         | copper-transporting ATPase, P-type , COPPER-TRANSPORTING P-TYPE ATPASE                     | Transporters                     |
| 1       | HP1073 | JHP0352 | copP         | copper ion binding protein , copper-associated protein                                     | Transporters                     |
| 10      | HP1075 | JHP0350 |              | conserved hypothetical secreted protein                                                    | Conserve Hypothetical            |
| 0       | HP1076 | JHP0349 |              |                                                                                            | Unknown Hypothetical             |
| 8       | HP1077 | JHP0348 | nixA         | nickel transport protein , HIGH-AFFINITY NICKEL-TRANSPORT PROTEIN                          | Transporters                     |
| 3       | HP1080 | JHP0345 |              | conserved hypothetical integral membrane protein                                           | Conserve Hypothetical            |
| 3       | HP1081 | JHP0344 |              |                                                                                            | Unknown Hypothetical             |
| 4       | HP1082 | JHP0343 | msbA         | multidrug resistance protein , multi-drug resistance protein                               | Transporters                     |
| 2       | HP1083 | JHP0342 |              | putative Outer membrane protein                                                            | Outer Membrane Protein           |
| 2       | HP1084 | JHP0341 | pyrB         | aspartate transcarbamoylase , ASPARTATE CARBAMOYLTRANSFERASE CATALYTIC CHAIN               | Biosynthesis and Metabolism      |
| 0       | HP1085 | JHP0340 |              |                                                                                            | Unknown Hypothetical             |
| 0       | HP1086 | JHP0339 | tly, hlyA    | hemolysin , putative hemolysin                                                             | Other                            |
| 0       | HP1087 | JHP0338 | ribC, ribF   | riboflavin biosynthesis regulatory protein , RIBOFLAVIN KINASE                             | Biosynthesis and Metabolism      |
| 9       | HP1088 | JHP0337 | tktA         | transketolase A , transketolase                                                            | Biosynthesis and Metabolism      |
| 0       | HP1089 | JHP0336 |              |                                                                                            | Unknown Hypothetical             |
| 9       | HP1090 | JHP0335 | ftsK         | cell division protein , septum formation protein                                           | Cell Division                    |
| 5       | HP1091 | JHP0334 | kgtP         | alpha-ketoglutarate permease                                                               | Transporters                     |
| 5       | HP1092 | JHP0333 | flgG, flgG_1 | flagellar basal-body rod protein                                                           | Motility                         |
| 0       | HP1093 | N/A     |              |                                                                                            | Unknown Hypothetical             |
| 1       | HP1094 | N/A     |              |                                                                                            | Unknown Hypothetical             |
| 10      | HP1095 | N/A     | tnpB         | IS605 transposase                                                                          | Transposon                       |
| 11      | HP1096 | N/A     | tnpA         | IS605 transposase                                                                          | Transposon                       |
| 7       | HP1097 | N/A     |              |                                                                                            | Unknown Hypothetical             |
| 6       | HP1098 | JHP1024 |              | conserved hypothetical secreted protein                                                    | Conserve Hypothetical            |

| Tn Hits | TIGR#  | ASTRA#  | Gene Name | Gene Description                                                                              | Process                          |
|---------|--------|---------|-----------|-----------------------------------------------------------------------------------------------|----------------------------------|
| 5       | HP1099 | JHP1025 | eda       | 2-keto-3-deoxy-6-phosphogluconate aldolase                                                    | Biosynthesis and Metabolism      |
| 2       | HP1100 | JHP1026 | edd       | 6-phosphogluconate dehydratase, PHOSPHOGLUCONATE DEHYDRATASE                                  | Biosynthesis and Metabolism      |
| 4       | HP1101 | JHP1027 | g6pD, zwf | glucose-6-phosphate dehydrogenase , GLUCOSE-6-PHOSPHATE 1-DEHYDROGENASE                       | Biosynthesis and Metabolism      |
| 0       | HP1102 | JHP1028 | devB      | glucose-6-phosphate 1-dehydrogenase , putative dehydrogenase                                  | Biosynthesis and Metabolism      |
| 6       | HP1103 | JHP1029 | glk       | glucokinase                                                                                   | Biosynthesis and Metabolism      |
| 7       | HP1104 | JHP1030 | cad       | cinnamyl-alcohol dehydrogenase ELI3-2 , ZINC-DEPENDENT ALCOHOL DEHYDROGENASE                  | Biosynthesis and Metabolism      |
| 2       | HP1105 | JHP1031 |           | LPS biosynthesis protein, putative lipopolysaccharide biosynthesis protein                    | Cell Envelope                    |
| 2       | HP1106 | JHP1033 |           |                                                                                               | Unknown Hypothetical             |
| 13      | HP1107 | JHP1034 | omp23     | outer membrane protein , putative Outer membrane protein                                      | Outer Membrane Protein           |
| 0       | HP1108 | JHP1035 | porG      | pyruvate ferredoxin oxidoreductase, gamma subunit, Pyruvate ferredoxin oxidoreductase         | Biosynthesis and Metabolism      |
| 2       | HP1109 | JHP1036 | porD      | pyruvate ferredoxin oxidoreductase, delta subunit, Pyruvate ferredoxin oxidoreductase         | Biosynthesis and Metabolism      |
| 10      | HP1110 | JHP1037 | porA      | pyruvate ferredoxin oxidoreductase, alpha subunit, Pyruvate ferredoxin oxidoreductase         | Biosynthesis and Metabolism      |
| 7       | HP1111 | JHP1038 | porB      | pyruvate ferredoxin oxidoreductase, beta subunit, Pyruvate ferredoxin oxidoreductase          | Biosynthesis and Metabolism      |
| 5       | HP1112 | JHP1039 | purB      | adenylosuccinate lyase                                                                        | Biosynthesis and Metabolism      |
| 15      | HP1113 | JHP1040 | omp24     | outer membrane protein , putative Outer membrane protein                                      | Outer Membrane Protein           |
| 11      | HP1114 | JHP1041 | uvrB      | excinuclease ABC subunit B                                                                    | DNA/RNA Synthesis and Processing |
| 10      | HP1115 | JHP1042 |           |                                                                                               | Unknown Hypothetical             |
| 1       | HP1116 | JHP1044 |           |                                                                                               | Unknown Hypothetical             |
| 2       | HP1117 | JHP1045 |           | conserved hypothetical secreted protein                                                       | Conserve Hypothetical            |
| 2       | HP1118 | JHP1046 | ggt       | gamma-glutamyltranspeptidase                                                                  | Biosynthesis and Metabolism      |
| 6       | HP1119 | JHP1047 | flgK      | flagellar hook-associated protein 1 (HAP1)                                                    | Motility                         |
| 7       | HP1120 | JHP1048 |           |                                                                                               | Unknown Hypothetical             |
| 1       | HP1121 | JHP1050 | BSP6I M   | cytosine specific DNA methyltransferase , TYPE II DNA MODIFICATION ENZYME (METHYLTRANSFERASE) | Restiction Modification          |
| 1       | HP1122 | JHP1051 |           |                                                                                               | Unknown Hypothetical             |

| Tn Hits | TIGR#  | ASTRA#  | Gene Name    | Gene Description                                                                                             | Process                          |
|---------|--------|---------|--------------|--------------------------------------------------------------------------------------------------------------|----------------------------------|
| 3       | HP1123 | JHP1052 | slyD         | peptidyl-prolyl cis-trans isomerase, FKBP-type rotamase , FKBP-TYPE PEPTIDYL-PROLYL CIS-TRANS ISOMERASE      | Protein Synthesis and Processing |
| 2       | HP1124 | JHP1053 |              |                                                                                                              | Unknown Hypothetical             |
| 2       | HP1125 | JHP1054 | omp18        | peptidoglycan associated lipoprotein precursor , putative Outer membrane protein                             | Cell Envelope                    |
| 2       | HP1126 | JHP1055 | tolB         | colicin tolerance-like protein , putative TONB-INDEPENDENT PROTEIN-UPTAKE PROTEIN                            | Outer Membrane Protein           |
| 0       | HP1127 | JHP1056 |              |                                                                                                              | Unknown Hypothetical             |
| 0       | HP1129 | JHP1057 | exbD, exbD_1 | biopolymer transport protein                                                                                 | Transporters                     |
| 0       | HP1130 | JHP1058 | exbB, exbB_1 | biopolymer transport protein                                                                                 | Transporters                     |
| 0       | HP1131 | JHP1059 | atpC         | ATP synthase F1, subunit epsilon                                                                             | Biosynthesis and Metabolism      |
| 0       | HP1132 | JHP1060 | atpD         | ATP synthase F1, subunit beta                                                                                | Biosynthesis and Metabolism      |
| 0       | HP1133 | JHP1061 | atpG         | ATP synthase F1, subunit gamma                                                                               | Biosynthesis and Metabolism      |
| 2       | HP1134 | JHP1062 | atpA         | ATP synthase F1, subunit alpha                                                                               | Biosynthesis and Metabolism      |
| 0       | HP1135 | JHP1063 | atpH         | ATP synthase F1, subunit delta , putative ATP synthase F1, subunit delta                                     | Biosynthesis and Metabolism      |
| 0       | HP1136 | JHP1064 | atpF         | ATP synthase F0, subunit b                                                                                   | Biosynthesis and Metabolism      |
| 0       | HP1137 | JHP1065 | atpF', atpX  | ATP synthase F0, subunit b' , ATP synthase B'                                                                | Biosynthesis and Metabolism      |
| 1       | HP1138 | JHP1066 |              | plasmid replication-partition related protein                                                                | DNA/RNA Synthesis and Processing |
| 0       | HP1139 | JHP1067 | soj          | SpoOJ regulator                                                                                              | Other                            |
| 15      | HP1140 | JHP1068 | birA         | biotin operon repressor/biotin acetyl coenzyme A carboxylase synthetase , putative BIOTIN ACTIVATION PROTEIN | Biosynthesis and Metabolism      |
| 2       | HP1141 | JHP1069 | fmt          | methionyl-tRNA formyltransferase                                                                             | Protein Synthesis and Processing |
| 5       | HP1143 | JHP1071 |              |                                                                                                              | Unknown Hypothetical             |
| 1       | HP1144 | JHP1072 |              |                                                                                                              | Unknown Hypothetical             |
| 1       | HP1145 | JHP1073 |              |                                                                                                              | Unknown Hypothetical             |
| 3       | HP1146 | JHP1073 |              |                                                                                                              | Unknown Hypothetical             |
| 4       | HP1147 | JHP1074 | rpl19, rplS  | ribosomal protein L19 , 50S RIBOSOMAL PROTEIN L19.                                                           | Protein Synthesis and Processing |
| 1       | HP1148 | JHP1075 | trmD         | tRNA (guanine-N1)-methyltransferase                                                                          | Protein Synthesis and Processing |
| 0       | HP1149 | JHP1076 |              | conserved hypothetical protein                                                                               | Conserve Hypothetical            |
| 0       | HP1150 | JHP1077 |              |                                                                                                              | Unknown Hypothetical             |

| Tn Hits | TIGR#  | ASTRA#  | Gene Name       | Gene Description                                                                                                                                           | Process                          |
|---------|--------|---------|-----------------|------------------------------------------------------------------------------------------------------------------------------------------------------------|----------------------------------|
| 6       | HP1151 | JHP1078 | rpS16,<br>rpsP  | ribosomal protein S16 , 30S RIBOSOMAL PROTEIN S16                                                                                                          | Protein Synthesis and Processing |
| 6       | HP1152 | JHP1079 | ffh             | signal recognition particle protein , putative SIGNAL RECOGNITION PARTICLE PROTEIN                                                                         | Protein Synthesis and Processing |
| 0       | HP1153 | JHP1080 | valS            | valyl-tRNA synthetase                                                                                                                                      | Protein Synthesis and Processing |
| 2       | HP1154 | JHP1081 |                 |                                                                                                                                                            | Unknown Hypothetical             |
| 4       | HP1155 | JHP1082 | murG            | transferase, peptidoglycan synthesis , UDP-N-ACETYLGLUCOSAMINE--N-ACETYLMURAMYL-(PENTAPEPTIDE) PYROPHOSPHORYL-UNDECAPRENOL N-ACETYLGLUCOSAMINE TRANSFERASE | Cell Envelope                    |
| 7       | HP1156 | JHP1083 | omp25           | outer membrane protein , putative Outer membrane protein                                                                                                   | Outer Membrane Protein           |
| 7       | HP1157 | JHP1084 | omp26           | outer membrane protein , putative Outer membrane protein                                                                                                   | Outer Membrane Protein           |
| 1       | HP1158 | JHP1085 | proC            | pyrroline-5-carboxylate reductase , putative PYRROLINE-5-CARBOXYLATE REDUCTASE                                                                             | Biosynthesis and Metabolism      |
| 6       | HP1159 | JHP1086 | fic             | cell filamentation protein , putative cAMP-induced cell filamentation protein                                                                              | Cell Division                    |
| 1       | HP1160 | JHP1087 |                 | conserved hypothetical protein                                                                                                                             | Conserve Hypothetical            |
| 0       | HP1161 | JHP1088 | fldA            | flavodoxin                                                                                                                                                 | Biosynthesis and Metabolism      |
| 1       | HP1162 | JHP1089 |                 | conserved hypothetical integral membrane protein                                                                                                           | Conserve Hypothetical            |
| 0       | HP1163 | JHP1090 | fixS            | putative component of cation transport for cbb3-type oxidase                                                                                               | Conserved Hypothetical           |
| 1       | HP1164 | JHP1091 | trxB,<br>trxB_2 | thioredoxin reductase , putative THIOREDOXIN REDUCTASE                                                                                                     | Biosynthesis and Metabolism      |
| 5       | HP1165 | JHP1092 |                 | tetracycline resistance protein tetA(P), putative                                                                                                          | Outer Membrane Protein           |
| 6       | HP1166 | JHP1093 | pgi             | glucose-6-phosphate isomerase                                                                                                                              | Biosynthesis and Metabolism      |
| 4       | HP1167 | JHP1094 |                 | putative Outer membrane protein                                                                                                                            | Outer Membrane Protein           |
| 13      | HP1168 | JHP1095 | cstA            | carbon starvation protein                                                                                                                                  | Regulation                       |
| 4       | HP1169 | JHP1096 | glnP            | glutamine ABC transporter, permease protein , AMINO ACID ABC TRANSPORTER, PERMEASE PROTEIN                                                                 | Transporters                     |
| 0       | HP1170 | JHP1097 | glnP            | glutamine ABC transporter, permease protein , AMINO ACID ABC TRANSPORTER, PERMEASE PROTEIN                                                                 | Transporters                     |



| Tn Hits | TIGR#  | ASTRA#  | Gene Name     | Gene Description                                                                                                         | Process                          |
|---------|--------|---------|---------------|--------------------------------------------------------------------------------------------------------------------------|----------------------------------|
| 1       | HP1171 | JHP1098 | glnQ          | glutamine ABC transporter, ATP-binding protein , AMINO ACID ABC TRANSPORTER, ATP-BINDING PROTEIN                         | Transporters                     |
| 10      | HP1172 | JHP1099 | glnH          | glutamine ABC transporter, periplasmic glutamine-binding protein , AMINO ACID ABC TRANSPORTER, BINDING PROTEIN PRECURSOR | Transporters                     |
| 4       | HP1173 | JHP1100 |               |                                                                                                                          | Unknown Hypothetical             |
| 6       | HP1174 | JHP1101 | gluP          | glucose/galactose transporter                                                                                            | Transporters                     |
| 4       | HP1175 | JHP1102 |               | conserved hypothetical integral membrane protein                                                                         | Conserve Hypothetical            |
| 8       | HP1177 | JHP1103 | omp27         | outer membrane protein , putative Outer membrane function                                                                | Outer Membrane Protein           |
| 2       | HP1178 | JHP1104 | deoD          | purine-nucleoside phosphorylase , PURINE NUCLEOSIDE PHOSPHORYLASE                                                        | Biosynthesis and Metabolism      |
| 2       | HP1179 | JHP1105 | deoB          | phosphopentomutase                                                                                                       | Biosynthesis and Metabolism      |
| 5       | HP1180 | JHP1106 | nupC          | pyrimidine nucleoside transport protein , putative nucleoside transporter                                                | Transporters                     |
| 16      | HP1181 | JHP1107 |               | multidrug-efflux transporter, putative transporter                                                                       | Transporters                     |
| 9       | HP1182 | JHP1108 |               | conserved hypothetical protein                                                                                           | Conserve Hypothetical            |
| 7       | HP1183 | JHP1109 | napA          | NA <sup>+</sup> /H <sup>+</sup> antiporter , putative NA <sup>+</sup> /H <sup>+</sup> ANTIPORTER                         | Transporters                     |
| 8       | HP1184 | JHP1110 |               | conserved hypothetical integral membrane protein                                                                         | Conserve Hypothetical            |
| 6       | HP1185 | JHP1111 |               | conserved hypothetical integral membrane protein                                                                         | Conserve Hypothetical            |
| 6       | HP1186 | JHP1112 |               | carbonic anhydrase                                                                                                       | Biosynthesis and Metabolism      |
| 5       | HP1187 | JHP1113 |               |                                                                                                                          | Unknown Hypothetical             |
| 7       | HP1188 | N/A     |               |                                                                                                                          | Unknown Hypothetical             |
| 7       | HP1189 | JHP1114 | asd           | aspartate-semialdehyde dehydrogenase                                                                                     | Biosynthesis and Metabolism      |
| 0       | HP1190 | JHP1115 | hisS          | histidyl-tRNA synthetase                                                                                                 | Protein Synthesis and Processing |
| 3       | HP1191 | JHP1116 | rfaF,<br>waaF | ADP-heptose-lps heptosyltransferase II , ADP-HEPTOSE--LPS HEPTOSYLTRANSFERASE II                                         | Cell Envelope                    |
| 4       | HP1192 | JHP1117 |               | secreted protein involved in flagellar motility, putative motility protein                                               | Motility                         |
| 10      | HP1193 | N/A     |               | aldo-keto reductase, putative                                                                                            | Conserved Hypothetical           |
| 1       | HP1194 | N/A     |               |                                                                                                                          | Unknown Hypothetical             |
| 2       | HP1195 | JHP1118 | fusA          | translation elongation factor EF-G , ELONGATION FACTOR G (EF-G)                                                          | Protein Synthesis and Processing |
| 0       | HP1196 | JHP1119 | rps7,<br>rpsG | ribosomal protein S7 , 30S RIBOSOMAL PROTEIN S7                                                                          | Protein Synthesis and Processing |

| Tn Hits | TIGR#  | ASTRA#  | Gene Name      | Gene Description                                                                                             | Process                          |
|---------|--------|---------|----------------|--------------------------------------------------------------------------------------------------------------|----------------------------------|
| 0       | HP1197 | JHP1120 | rps12, rpsL    | ribosomal protein S12 , 30S RIBOSOMAL PROTEIN S12                                                            | Protein Synthesis and Processing |
| 7       | HP1198 | JHP1121 | rpoB           | DNA-directed RNA polymerase, beta subunit                                                                    | DNA/RNA Synthesis and Processing |
| 3       | HP1199 | JHP1122 | rpl7/l12, rplL | ribosomal protein L7/L12 , 50S RIBOSOMAL PROTEIN L7/L12                                                      | Protein Synthesis and Processing |
| 5       | HP1200 | JHP1123 | rpl10, rplJ    | ribosomal protein L10 , 50S RIBOSOMAL PROTEIN L10                                                            | Protein Synthesis and Processing |
| 1       | HP1201 | JHP1124 | rpl1, rplA     | ribosomal protein L1 , 50S RIBOSOMAL PROTEIN L1                                                              | Protein Synthesis and Processing |
| 0       | HP1202 | JHP1125 | rpl11, rplK    | ribosomal protein L11 , 50S RIBOSOMAL PROTEIN L11                                                            | Protein Synthesis and Processing |
| 0       | HP1203 | JHP1126 | nusG           | transcription termination factor NusG , TRANSCRIPTION ANTITERMINATION PROTEIN                                | DNA/RNA Synthesis and Processing |
| 5       | HP1204 | JHP1127 | rpL33, rpmG    | ribosomal protein L33 , 50S RIBOSOMAL PROTEIN L33                                                            | Protein Synthesis and Processing |
| 6       | HP1205 | JHP1128 | tufB, tufA     | translation elongation factor EF-Tu , ELONGATION FACTOR TU (EF-TU)                                           | Protein Synthesis and Processing |
| 0       | HP1206 | JHP1129 | hetA           | multidrug resistance protein , abc transporter, ATP-binding protein                                          | Transporters                     |
| 17      | HP1207 | JHP1130 |                |                                                                                                              | Unknown Hypothetical             |
| 1       | HP1208 | JHP1131 | M.HpyI         | ulcer associated adenine specific DNA methyltransferase, TYPE II DNA MODIFICATION ENZYME (METHYLTRANSFERASE) | Restiction Modification          |
| 6       | HP1210 | JHP1133 | cysE           | serine acetyltransferase , O-SERINE ACETYLTRANSFERASE                                                        | Biosynthesis and Metabolism      |
| 3       | HP1211 | JHP1134 |                |                                                                                                              | Unknown Hypothetical             |
| 9       | HP1212 | JHP1135 | atpE           | ATP synthase F0, subunit c                                                                                   | Biosynthesis and Metabolism      |
| 6       | HP1213 | JHP1136 | pnp            | polynucleotide phosphorylase , POLYRIBONUCLEOTIDE NUCLEOTIDYLTRANSFERASE                                     | DNA/RNA Synthesis and Processing |
| 4       | HP1214 | JHP1137 |                | conserved hypothetical protein                                                                               | Conserve Hypothetical            |
| 1       | HP1215 | JHP1138 | imp            | putative role in outermembrane permeability                                                                  | Conserved Hypothetical           |
| 0       | HP1216 | JHP1138 |                | conserved hypothetical secreted protein                                                                      | Conserve Hypothetical            |
| 0       | HP1217 | JHP1139 |                |                                                                                                              | Unknown Hypothetical             |
| 2       | HP1218 | JHP1140 | purD           | glycinamide ribonucleotide synthetase                                                                        | Biosynthesis and Metabolism      |
| 0       | HP1219 | N/A     |                |                                                                                                              | Unknown Hypothetical             |
| 1       | HP1220 | JHP1141 | yhcG           | ABC transporter, ATP-binding protein , putative ABC transporter, ATP-binding protein                         | Transporters                     |
| 9       | HP1221 | JHP1142 |                | conserved hypothetical protein                                                                               | Conserve Hypothetical            |
| 16      | HP1222 | JHP1143 | dld            | D-lactate dehydrogenase                                                                                      | Biosynthesis and Metabolism      |
| 3       | HP1223 | JHP1144 |                |                                                                                                              | Unknown Hypothetical             |

| Tn Hits | TIGR#  | ASTRA#  | Gene Name    | Gene Description                                                                   | Process                          |
|---------|--------|---------|--------------|------------------------------------------------------------------------------------|----------------------------------|
| 3       | HP1224 | JHP1145 | hemD         | uroporphyrinogen III cosynthase , putative UROPORPHYRINOGEN-III SYNTHASE           | Biosynthesis and Metabolism      |
| 4       | HP1225 | JHP1146 |              | conserved hypothetical integral membrane protein                                   | Conserve Hypothetical            |
| 4       | HP1226 | JHP1147 | hemN, hemN_2 | oxygen-independent coproporphyrinogen III oxidase                                  | Biosynthesis and Metabolism      |
| 2       | HP1227 | JHP1148 |              | cytochrome c553, PERIPLASMIC CYTOCHROME C-553                                      | Biosynthesis and Metabolism      |
| 1       | HP1228 | JHP1149 | invA, mutT   | invasion protein , putative DGTP PYROPHOSPHOHYDROLASE                              | Other                            |
| 0       | HP1229 | JHP1150 | lysC         | aspartokinase , ASPARTOKINASE 2 ALPHA AND BETA SUBUNITS                            | Biosynthesis and Metabolism      |
| 0       | HP1230 | JHP1151 |              |                                                                                    | Unknown Hypothetical             |
| 0       | HP1231 | JHP1152 | holB         | DNA polymerase III delta prime subunit , putative DNA poymerase III subunit delta' | DNA/RNA Synthesis and Processing |
| 1       | HP1232 | JHP1153 | folP         | dihydropteroate synthase                                                           | Biosynthesis and Metabolism      |
| 1       | HP1233 | JHP1154 |              |                                                                                    | Unknown Hypothetical             |
| 0       | HP1234 | JHP1155 |              | conserved hypothetical integral membrane protein                                   | Conserve Hypothetical            |
| 3       | HP1235 | JHP1156 |              | conserved hypothetical integral membrane protein                                   | Conserve Hypothetical            |
| 0       | HP1236 | JHP1157 |              |                                                                                    | Unknown Hypothetical             |
| 5       | HP1237 | JHP1158 | pyrAa, carA  | carbamoyl-phosphate synthetase , CARBAMOYL-PHOSPHATE SYNTHASE SMALL CHAIN          | Biosynthesis and Metabolism      |
| 5       | HP1238 | JHP1159 | aimE         | aliphatic amidase                                                                  | Biosynthesis and Metabolism      |
| 0       | HP1239 | N/A     |              |                                                                                    | Unknown Hypothetical             |
| 0       | HP1240 | JHP1161 |              | conserved hypothetical protein                                                     | Conserve Hypothetical            |
| 6       | HP1241 | JHP1162 | alaS         | alanyl-tRNA synthetase                                                             | Protein Synthesis and Processing |
| 1       | HP1242 | JHP1163 |              | conserved hypothetical protein                                                     | Conserve Hypothetical            |
| 3       | HP1243 | JHP0833 | omp28, babA  | outer membrane protein , outer membrane protein - adhesin                          | Outer Membrane Protein           |
| 0       | HP1244 | JHP1165 | rps18, rpsR  | ribosomal protein S18 , 30S RIBOSOMAL PROTEIN S18                                  | Protein Synthesis and Processing |
| 0       | HP1245 | JHP1166 | ssb          | single-strand DNA-binding protein , SINGLE-STRAND BINDING PROTEIN                  | DNA/RNA Synthesis and Processing |
| 0       | HP1246 | JHP1167 | rps6, rpsF   | ribosomal protein S6 , 30S RIBOSOMAL PROTEIN S6                                    | Protein Synthesis and Processing |
| 0       | HP1247 | JHP1168 |              |                                                                                    | Unknown Hypothetical             |
| 6       | HP1248 | JHP1169 | vacB         | virulence associated protein homolog , RIBONUCLEASE II FAMILY PROTEIN              | Other                            |

| Tn Hits | TIGR#  | ASTRA#  | Gene Name   | Gene Description                                                                                       | Process                          |
|---------|--------|---------|-------------|--------------------------------------------------------------------------------------------------------|----------------------------------|
| 0       | HP1249 | JHP1170 | aroE        | shikimate 5-dehydrogenase                                                                              | Biosynthesis and Metabolism      |
| 5       | HP1250 | JHP1171 |             |                                                                                                        | Unknown Hypothetical             |
| 15      | HP1251 | JHP1172 | oppB        | oligopeptide ABC transporter, permease protein , putative Peptide ABC transporter, ATP-binding protein | Transporters                     |
| 4       | HP1252 | JHP1173 | oppA        | oligopeptide ABC transporter, periplasmic oligopeptide-binding protein                                 | Transporters                     |
| 0       | HP1253 | JHP1174 | trpS        | tryptophanyl-tRNA synthetase                                                                           | Protein Synthesis and Processing |
| 0       | HP1254 | JHP1175 | bioC        | biotin synthesis protein                                                                               | Biosynthesis and Metabolism      |
| 11      | HP1255 | JHP1176 | secG        | protein translocation protein, low temperature , PROTEIN-EXPORT MEMBRANE PROTEIN                       | Protein Synthesis and Processing |
| 14      | HP1256 | JHP1177 | frf         | ribosome releasing factor , RIBOSOME RECYCLING FACTOR (RIBOSOME RELEASING FACTOR) (RRF)                | Protein Synthesis and Processing |
| 2       | HP1257 | JHP1178 | pyrE        | orotate phosphoribosyltransferase                                                                      | Biosynthesis and Metabolism      |
| 1       | HP1258 | JHP1179 |             | conserved hypothetical mitochondrial protein 4                                                         | Conserve Hypothetical            |
| 3       | HP1259 | JHP1180 |             | conserved hypothetical protein                                                                         | Conserve Hypothetical            |
| 2       | HP1260 | JHP1181 | NQO7, nuoA  | NADH-ubiquinone oxidoreductase, NQO7 subunit , NADH oxidoreductase I                                   | Biosynthesis and Metabolism      |
| 0       | HP1261 | JHP1182 | NQO6, nuoB  | NADH-ubiquinone oxidoreductase, NQO6 subunit , NADH oxidoreductase I                                   | Biosynthesis and Metabolism      |
| 1       | HP1262 | JHP1183 | NQO5, nuoC  | NADH-ubiquinone oxidoreductase, NQO5 subunit , NADH oxidoreductase I                                   | Biosynthesis and Metabolism      |
| 1       | HP1263 | JHP1184 | NQO4, nuoD  | NADH-ubiquinone oxidoreductase, NQO4 subunit , NADH oxidoreductase I                                   | Biosynthesis and Metabolism      |
| 0       | HP1264 | JHP1185 | nuoE        | putative NADH oxidoreductase I                                                                         | Conserved Hypothetical           |
| 0       | HP1265 | JHP1186 | nuoF        | putative NADH oxidoreductase I                                                                         | Conserved Hypothetical           |
| 0       | HP1266 | JHP1187 | NQO3, nuoG  | NADH-ubiquinone oxidoreductase, NQO3 subunit , NADH oxidoreductase I                                   | Biosynthesis and Metabolism      |
| 4       | HP1267 | JHP1188 | NQO8, nuoH  | NADH-ubiquinone oxidoreductase, NQO8 subunit , NADH oxidoreductase I                                   | Biosynthesis and Metabolism      |
| 0       | HP1268 | JHP1189 | NQO9, nuoI  | NADH-ubiquinone oxidoreductase, NQO9 subunit , NADH oxidoreductase I                                   | Biosynthesis and Metabolism      |
| 2       | HP1269 | JHP1190 | NQO10, nuoJ | NADH-ubiquinone oxidoreductase, NQO10 subunit , NADH oxidoreductase I                                  | Biosynthesis and Metabolism      |

| Tn Hits | TIGR#  | ASTRA#  | Gene Name          | Gene Description                                                          | Process                          |
|---------|--------|---------|--------------------|---------------------------------------------------------------------------|----------------------------------|
| 0       | HP1270 | JHP1191 | NQO1<br>1,<br>nuoK | NADH-ubiquinone oxidoreductase, NQO11 subunit , NADH oxidoreductase I     | Biosynthesis and Metabolism      |
| 7       | HP1271 | JHP1192 | NQO1<br>2,<br>nuoL | NADH-ubiquinone oxidoreductase, NQO12 subunit , NADH oxidoreductase I     | Biosynthesis and Metabolism      |
| 1       | HP1272 | JHP1193 | NQO1<br>3,<br>nuoM | NADH-ubiquinone oxidoreductase, NQO13 subunit , NADH oxidoreductase I     | Biosynthesis and Metabolism      |
| 4       | HP1273 | JHP1194 | NQO1<br>4,<br>nuoN | NADH-ubiquinone oxidoreductase, NQO14 subunit , NADH oxidoreductase I     | Biosynthesis and Metabolism      |
| 10      | HP1274 | JHP1195 | pflA               | paralysed flagella protein , FLAGELLAR FUNCTIONAL PROTEIN                 | Motility                         |
| 9       | HP1275 | JHP1196 | algC               | phosphomannomutase , phosphohexosemutase                                  | Cell Envelope                    |
| 10      | HP1276 | JHP1197 |                    |                                                                           | Unknown Hypothetical             |
| 4       | HP1277 | JHP1198 | trpA               | tryptophan synthase, alpha subunit , TRYPTOPHAN SYNTHASE ALPHA CHAIN      | Biosynthesis and Metabolism      |
| 3       | HP1278 | JHP1199 | trpB               | tryptophan synthase, beta subunit , TRYPTOPHAN SYNTHASE BETA CHAIN        | Biosynthesis and Metabolism      |
| 5       | HP1279 | JHP1200 | trpC               | anthranilate isomerase , INDOLE-3-GLYCEROL PHOSPHATE SYNTHASE             | Biosynthesis and Metabolism      |
| 3       | HP1280 | JHP1201 | trpD               | ANTHRANILATE PHOSPHORIBOSYLTRANSFERASE                                    | Biosynthesis and Metabolism      |
| 5       | HP1281 | JHP1202 | trpD,<br>trpG      | anthranilate synthase component II                                        | Biosynthesis and Metabolism      |
| 3       | HP1282 | JHP1203 | trpE               | anthranilate synthase component I                                         | Biosynthesis and Metabolism      |
| 6       | HP1283 | N/A     |                    |                                                                           | Unknown Hypothetical             |
| 8       | HP1284 | JHP1204 |                    | conserved hypothetical protein                                            | Conserve Hypothetical            |
| 4       | HP1285 | JHP1205 |                    | conserved hypothetical secreted protein                                   | Conserve Hypothetical            |
| 4       | HP1286 | JHP1206 |                    | conserved hypothetical secreted protein                                   | Conserve Hypothetical            |
| 4       | HP1287 | JHP1207 | tenA               | transcriptional regulator , putative TRANSCRIPTIONAL REGULATOR            | Regulation                       |
| 0       | HP1289 | JHP1209 |                    |                                                                           | Unknown Hypothetical             |
| 2       | HP1290 | JHP1210 | pnuC               | nicotinamide mononucleotide transporter                                   | Transporters                     |
| 3       | HP1291 | JHP1211 |                    | conserved hypothetical protein                                            | Conserve Hypothetical            |
| 0       | HP1292 | JHP1212 | rpl17,<br>rplQ     | ribosomal protein L17 , 50S RIBOSOMAL PROTEIN L17                         | Protein Synthesis and Processing |
| 7       | HP1293 | JHP1213 | rpoA               | DNA-directed RNA polymerase, alpha subunit , RNA POLYMERASE ALPHA SUBUNIT | DNA/RNA Synthesis and Processing |
| 3       | HP1294 | JHP1214 | rps4,<br>rpsD      | ribosomal protein S4 , 30S RIBOSOMAL PROTEIN S4                           | Protein Synthesis and Processing |
| 6       | HP1295 | JHP1215 | rps11,<br>rpsK     | ribosomal protein S11 , 30S RIBOSOMAL PROTEIN S11                         | Protein Synthesis and Processing |

| Tn Hits | TIGR#  | ASTRA#  | Gene Name      | Gene Description                                                        | Process                          |
|---------|--------|---------|----------------|-------------------------------------------------------------------------|----------------------------------|
| 11      | HP1296 | JHP1216 | rps13,<br>rpsM | ribosomal protein S13 , 30S RIBOSOMAL PROTEIN S13                       | Protein Synthesis and Processing |
| 0       | HP1297 | JHP1217 | rpl36,<br>rpmJ | ribosomal protein L36 , 50S RIBOSOMAL PROTEIN L36                       | Protein Synthesis and Processing |
| 0       | HP1298 | JHP1218 | infA           | translation initiation factor EF-1 , TRANSLATION INITIATION FACTOR IF-1 | Protein Synthesis and Processing |
| 0       | HP1299 | JHP1219 | map            | methionine amino peptidase , METHIONINE AMINOPEPTIDASE                  | Protein Synthesis and Processing |
| 0       | HP1300 | JHP1220 | secY           | preprotein translocase subunit                                          | Protein Synthesis and Processing |
| 0       | HP1301 | JHP1221 | rpl15,<br>rplO | ribosomal protein L15 , 50S RIBOSOMAL PROTEIN L15                       | Protein Synthesis and Processing |
| 0       | HP1302 | JHP1222 | rps5,<br>rpsE  | ribosomal protein S5 , 30S RIBOSOMAL PROTEIN S5                         | Protein Synthesis and Processing |
| 9       | HP1303 | JHP1223 | rpl18,<br>rplR | ribosomal protein L18 , 50S RIBOSOMAL PROTEIN L18                       | Protein Synthesis and Processing |
| 2       | HP1304 | JHP1224 | rpl6,<br>rplF  | ribosomal protein L6 , 50S RIBOSOMAL PROTEIN L6                         | Protein Synthesis and Processing |
| 1       | HP1305 | JHP1225 | rps8,<br>rpsH  | ribosomal protein S8 , putative 30S RIBOSOMAL PROTEIN S8                | Protein Synthesis and Processing |
| 0       | HP1306 | JHP1226 | rpS14,<br>rpsN | ribosomal protein S14 , 30S RIBOSOMAL PROTEIN S14                       | Protein Synthesis and Processing |
| 0       | HP1307 | JHP1227 | rpl5,<br>rplE  | ribosomal protein L5 , 50S RIBOSOMAL PROTEIN L5                         | Protein Synthesis and Processing |
| 0       | HP1308 | JHP1228 | rpl24,<br>rplX | ribosomal protein L24 , 50S RIBOSOMAL PROTEIN L24                       | Protein Synthesis and Processing |
| 0       | HP1309 | JHP1229 | rpl14,<br>rplN | ribosomal protein L14 , 50S RIBOSOMAL PROTEIN L14                       | Protein Synthesis and Processing |
| 1       | HP1310 | JHP1230 | rps17,<br>rpsQ | ribosomal protein S17 , 30S RIBOSOMAL PROTEIN S17                       | Protein Synthesis and Processing |
| 0       | HP1311 | JHP1231 | rpL29,<br>rpmC | ribosomal protein L29 , 50S RIBOSOMAL PROTEIN L29                       | Protein Synthesis and Processing |
| 1       | HP1312 | JHP1232 | rpl16,<br>rplP | ribosomal protein L16 , 50S RIBOSOMAL PROTEIN L16                       | Protein Synthesis and Processing |
| 0       | HP1313 | JHP1233 | rps3,<br>rpsC  | ribosomal protein S3 , 30S RIBOSOMAL PROTEIN S3                         | Protein Synthesis and Processing |
| 0       | HP1314 | JHP1234 | rpl22,<br>rplV | ribosomal protein L22 , 50S RIBOSOMAL PROTEIN L22                       | Protein Synthesis and Processing |
| 3       | HP1315 | JHP1235 | rps19,<br>rpsS | ribosomal protein S19 , 30S RIBOSOMAL PROTEIN S19                       | Protein Synthesis and Processing |
| 2       | HP1317 | JHP1237 | rpl23,<br>rplW | ribosomal protein L23 , 50S RIBOSOMAL PROTEIN L23                       | Protein Synthesis and Processing |
| 0       | HP1318 | JHP1238 | rpl4,<br>rplD  | ribosomal protein L4 , 50S RIBOSOMAL PROTEIN L4                         | Protein Synthesis and Processing |
| 4       | HP1319 | JHP1239 | rpl3,<br>rplC  | ribosomal protein L3 , 50S RIBOSOMAL PROTEIN L3                         | Protein Synthesis and Processing |
| 0       | HP1320 | JHP1240 | rps10,<br>rpsJ | ribosomal protein S10 , 30S RIBOSOMAL PROTEIN S10                       | Protein Synthesis and Processing |

| Tn Hits | TIGR#  | ASTRA#  | Gene Name    | Gene Description                                                                                      | Process                          |
|---------|--------|---------|--------------|-------------------------------------------------------------------------------------------------------|----------------------------------|
| 0       | HP1321 | JHP1241 |              | conserved hypothetical ATP-binding protein                                                            | Conserve Hypothetical            |
| 5       | HP1322 | JHP1242 |              |                                                                                                       | Unknown Hypothetical             |
| 2       | HP1323 | JHP1243 | rnhB         | ribonuclease HII                                                                                      | DNA/RNA Synthesis and Processing |
| 2       | HP1324 | JHP1244 |              |                                                                                                       | Unknown Hypothetical             |
| 6       | HP1325 | JHP1245 | fumC         | fumarase                                                                                              | Biosynthesis and Metabolism      |
| 12      | HP1326 | JHP1246 |              |                                                                                                       | Unknown Hypothetical             |
| 8       | HP1327 | JHP1247 |              |                                                                                                       | Unknown Hypothetical             |
| 6       | HP1328 | JHP1248 | czcA, czcB_2 | cation efflux system protein                                                                          | Transporters                     |
| 15      | HP1329 | JHP1249 | czcA, czcA_2 | cation efflux system protein                                                                          | Transporters                     |
| 3       | HP1330 | JHP1250 |              | conserved hypothetical integral membrane protein                                                      | Conserve Hypothetical            |
| 2       | HP1331 | JHP1251 |              | conserved hypothetical integral membrane protein                                                      | Conserve Hypothetical            |
| 8       | HP1332 | JHP1252 | dnaJ, dnaJ_2 | co-chaperone and heat shock protein , co-chaperone with DnaK                                          | Chaperones                       |
| 11      | HP1333 | JHP1253 |              |                                                                                                       | Unknown Hypothetical             |
| 4       | HP1334 | N/A     |              |                                                                                                       | Unknown Hypothetical             |
| 3       | HP1335 | JHP1254 | trmU         | conserved hypothetical protein, putative TRNA (5-METHYLAMINOMETHYL-2-THIOURIDYLATE)-METHYLTRANSFERASE | Conserve Hypothetical            |
| 4       | HP1336 | JHP1255 |              |                                                                                                       | Unknown Hypothetical             |
| 2       | HP1337 | JHP1256 |              | conserved hypothetical protein                                                                        | Conserve Hypothetical            |
| 0       | HP1338 | JHP1257 |              | conserved hypothetical protein                                                                        | Conserve Hypothetical            |
| 0       | HP1339 | JHP1258 | exbB, exbB_2 | biopolymer transport protein                                                                          | Transporters                     |
| 0       | HP1340 | JHP1259 | exbD, exbD_2 | biopolymer transport protein , BIOPOLYMER TRANSPORT EXBD PROTEIN                                      | Transporters                     |
| 2       | HP1341 | JHP1260 | tonB, tonB_2 | siderophore-mediated iron transport protein                                                           | Transporters                     |
| 8       | HP1342 | JHP1261 | omp29        | outer membrane protein , putative Outer membrane protein                                              | Outer Membrane Protein           |
| 3       | HP1343 | JHP1262 |              | conserved hypothetical integral membrane protein                                                      | Conserve Hypothetical            |
| 8       | HP1344 | JHP1263 | corA         | magnesium and cobalt transport protein                                                                | Transporters                     |
| 5       | HP1345 | JHP1264 | pgk          | phosphoglycerate kinase                                                                               | Biosynthesis and Metabolism      |

| Tn Hits | TIGR#  | ASTRA#  | Gene Name      | Gene Description                                                                             | Process                          |
|---------|--------|---------|----------------|----------------------------------------------------------------------------------------------|----------------------------------|
| 1       | HP1346 | JHP1265 | gap, gap_2     | glyceraldehyde-3-phosphate dehydrogenase , GLYCERALDEHYDE 3-PHOSPHATE DEHYDROGENASE          | Biosynthesis and Metabolism      |
| 2       | HP1347 | JHP1266 | ung            | uracil-DNA glycosylase                                                                       | DNA/RNA Synthesis and Processing |
| 0       | HP1348 | JHP1267 | plsC           | 1-acyl-glycerol-3-phosphate acyltransferase , 1-ACYL-SN-GLYCEROL-3-PHOSPHATE ACYLTRANSFERASE | Biosynthesis and Metabolism      |
| 0       | HP1349 | JHP1268 |                |                                                                                              | Unknown Hypothetical             |
| 5       | HP1350 | JHP1269 | prc            | protease, CARBOXYL-TERMINAL PROTEASE                                                         | Protein Synthesis and Processing |
| 1       | HP1351 | JHP1270 |                |                                                                                              | Unknown Hypothetical             |
| 3       | HP1352 | JHP1271 | HINFI M        | adenine specific DNA methyltransferase , TYPE II DNA MODIFICATION ENZYME (METHYLTRANSFERASE) | Restiction Modification          |
| 6       | HP1353 | JHP1272 |                |                                                                                              | Unknown Hypothetical             |
| 8       | HP1354 | JHP1272 |                | putative adenine specific DNA methyltransferase                                              | Restiction Modification          |
| 1       | HP1355 | JHP1273 | nadC           | nicotinate-nucleotide pyrophosphorylase                                                      | Biosynthesis and Metabolism      |
| 1       | HP1356 | JHP1274 | nadA           | quinolinate synthetase A , QUINOLINATE SYNTHETASE                                            | Biosynthesis and Metabolism      |
| 0       | HP1357 | JHP1275 | psd            | phosphatidylserine decarboxylase proenzyme , PHOSPHATIDYLSERINE DECARBOXYLASE                | Biosynthesis and Metabolism      |
| 2       | HP1358 | JHP1276 |                |                                                                                              | Unknown Hypothetical             |
| 0       | HP1359 | JHP1277 |                |                                                                                              | Unknown Hypothetical             |
| 0       | HP1360 | JHP1278 | ubiA           | 4-hydroxybenzoate octaprenyltransferase                                                      | Biosynthesis and Metabolism      |
| 3       | HP1361 | JHP1279 | comE3 , comE C | competence locus E , DNA transfer protein                                                    | Competance                       |
| 1       | HP1362 | JHP1280 | dnaB           | replicative DNA helicase                                                                     | DNA/RNA Synthesis and Processing |
| 5       | HP1363 | JHP1281 |                | conserved hypothetical integral membrane protein                                             | Conserve Hypothetical            |
| 3       | HP1364 | JHP1282 |                | signal-transducing protein, histidine kinase, putative histidine kinase sensor protein       | Regulation                       |
| 2       | HP1365 | JHP1283 | JHP1443        | response regulator                                                                           | Regulation                       |
| 7       | HP1369 | N/A     |                |                                                                                              | Restiction Modification          |
| 5       | HP1370 | N/A     | mod            | type III restriction enzyme M protein                                                        | Restiction Modification          |
| 7       | HP1371 | JHP1285 |                | type III restriction enzyme R protein                                                        | Restiction Modification          |
| 1       | HP1372 | JHP1286 | mreC           | rod shape-determining protein                                                                | Cell Envelope                    |
| 2       | HP1373 | JHP1287 | mreB           | rod shape-determining protein                                                                | Cell Envelope                    |
| 2       | HP1374 | JHP1288 | clpX           | ATP-dependent protease ATPase subunit , ATP-DEPENDENT PROTEASE,ATP-BINDING SUBUNIT           | Protein Synthesis and Processing |



| Tn Hits | TIGR#  | ASTRA#  | Gene Name    | Gene Description                                                                                             | Process                          |
|---------|--------|---------|--------------|--------------------------------------------------------------------------------------------------------------|----------------------------------|
| 0       | HP1375 | JHP1289 | lpxA         | UDP-N-acetylglucosamine acyltransferase                                                                      | Cell Envelope                    |
| 1       | HP1376 | JHP1290 | fabZ         | (3R)-hydroxymyristoyl-(acyl carrier protein) dehydratase , HYDROXYMYRISTOYL-ACYL CARRIER PROTEIN DEHYDRATASE | Biosynthesis and Metabolism      |
| 1       | HP1377 | JHP1291 |              |                                                                                                              | Unknown Hypothetical             |
| 4       | HP1378 | JHP1292 | comL         | competence lipoprotein                                                                                       | Competance                       |
| 1       | HP1379 | JHP1293 | lon          | ATP-dependent protease , ATP-DEPENDENT PROTEASE LA                                                           | Protein Synthesis and Processing |
| 12      | HP1380 | JHP1294 | tyrA         | prephenate dehydrogenase                                                                                     | Biosynthesis and Metabolism      |
| 3       | HP1381 | N/A     |              |                                                                                                              | Unknown Hypothetical             |
| 4       | HP1382 | JHP1295 |              | putative ENDONUCLEASE                                                                                        | Conserved Hypothetical           |
| 0       | HP1384 | JHP1441 |              |                                                                                                              | Unknown Hypothetical             |
| 0       | HP1385 | JHP1440 | fbp          | fructose-1,6-bisphosphatase                                                                                  | Biosynthesis and Metabolism      |
| 0       | HP1386 | JHP1439 | rpe          | D-ribulose-5-phosphate 3 epimerase , RIBULOSE-PHOSPHATE 3-EPIMERASE                                          | Biosynthesis and Metabolism      |
| 1       | HP1387 | JHP1438 | dnaQ         | DNA polymerase III epsilon subunit , DNA POLYMERASE III                                                      | DNA/RNA Synthesis and Processing |
| 0       | HP1388 | N/A     |              |                                                                                                              | Unknown Hypothetical             |
| 2       | HP1391 | JHP1436 |              |                                                                                                              | Unknown Hypothetical             |
| 4       | HP1392 | JHP1435 |              | fibronectin/fibrinogen-binding protein                                                                       | Cell Envelope                    |
| 7       | HP1393 | JHP1434 | recN         | DNA repair protein , DNA REPAIR PROTEIN(RECOMBINATION PROTEIN N)                                             | DNA/RNA Synthesis and Processing |
| 6       | HP1394 | JHP1433 |              | conserved hypothetical protein                                                                               | Conserve Hypothetical            |
| 2       | HP1395 | JHP1432 | omp30        | outer membrane protein , putative OUTER MEMBRANE PROTEIN                                                     | Outer Membrane Protein           |
| 1       | HP1396 | JHP1431 |              |                                                                                                              | Unknown Hypothetical             |
| 5       | HP1397 | JHP1430 |              |                                                                                                              | Unknown Hypothetical             |
| 7       | HP1398 | JHP1428 | ald          | alanine dehydrogenase , L-ALANINE DEHYDROGENASE                                                              | Biosynthesis and Metabolism      |
| 7       | HP1399 | JHP1427 | rocF         | arginase                                                                                                     | Biosynthesis and Metabolism      |
| 3       | HP1400 | JHP1426 | fecA, fecA_3 | iron(III) dicitrate transport protein , putative IRON(III) DICITRATE TRANSPORT PROTEIN                       | Transporters                     |
| 2       | HP1401 | JHP1425 |              | conserved hypothetical protein                                                                               | Conserve Hypothetical            |
| 4       | HP1402 | JHP1424 | hsdR, hsdR_3 | type I restriction enzyme R protein , TYPE I RESTRICTION ENZYME (RESTRICTION SUBUNIT)                        | Restiction Modification          |
| 11      | HP1403 | JHP1423 | hsdM, hsdM_3 | type I restriction enzyme M protein , TYPE I RESTRICTION ENZYME (MODIFICATION SUBUNIT)                       | Restiction Modification          |
| 0       | HP1405 | N/A     |              |                                                                                                              | Unknown Hypothetical             |

| Tn Hits | TIGR#  | ASTRA#  | Gene Name      | Gene Description                                                                                  | Process                          |
|---------|--------|---------|----------------|---------------------------------------------------------------------------------------------------|----------------------------------|
| 1       | HP1406 | JHP1298 | bioB           | biotin synthetase                                                                                 | Biosynthesis and Metabolism      |
| 6       | HP1407 | JHP1299 | rbn            | conserved hypothetical integral membrane protein, putative ribonuclease N                         | Conserve Hypothetical            |
| 2       | HP1408 | JHP1300 |                |                                                                                                   | Unknown Hypothetical             |
| 8       | HP1409 | JHP1301 | JHP1302        |                                                                                                   | Unknown Hypothetical             |
| 4       | HP1410 | JHP1303 |                |                                                                                                   | Unknown Hypothetical             |
| 3       | HP1411 | JHP1304 | JHP1305        |                                                                                                   | Unknown Hypothetical             |
| 5       | HP1412 | JHP1307 |                |                                                                                                   | Unknown Hypothetical             |
| 0       | HP1413 | JHP1308 |                | conserved hypothetical protein                                                                    | Conserve Hypothetical            |
| 0       | HP1414 | JHP1309 |                | conserved hypothetical protein                                                                    | Conserve Hypothetical            |
| 1       | HP1415 | JHP1310 | miaA           | tRNA delta(2)-isopentenylpyrophosphate transferase                                                | Protein Synthesis and Processing |
| 4       | HP1416 | JHP1311 | rfaJ           | lipopolysaccharide 1,2-glucosyltransferase , lipopolysaccharide biosynthesis protein              | Cell Envelope                    |
| 9       | HP1417 | JHP1312 |                |                                                                                                   | Conserve Hypothetical            |
| 13      | HP1418 | JHP1313 | murB           | UDP-N-acetylenolpyruvoylglucosamine reductase                                                     | Cell Envelope                    |
| 0       | HP1419 | JHP1314 | fliQ           | flagellar biosynthetic protein , FLAGELLAR BIOSYNTHESIS PROTEIN                                   | Motility                         |
| 10      | HP1420 | JHP1315 | fliI           | flagellar export protein ATP synthase , FLAGELLUM-SPECIFIC ATP SYNTHASE                           | Motility                         |
| 0       | HP1421 | JHP1316 | trbB, virB11_2 | conjugative transfer regulon protein , DNA transfer protein                                       | Other                            |
| 16      | HP1423 | JHP1318 |                | conserved hypothetical protein                                                                    | Conserve Hypothetical            |
| 1       | HP1424 | JHP1319 |                |                                                                                                   | Unknown Hypothetical             |
| 2       | HP1427 | JHP1320 | hpn            | histidine-rich, metal binding polypeptide , putative histidine-rich metal-binding protein         | Transporters                     |
| 7       | HP1428 | JHP1325 |                | conserved hypothetical protein                                                                    | Conserve Hypothetical            |
| 2       | HP1429 | JHP1324 | kpsF           | polysialic acid capsule expression protein                                                        | Cell Envelope                    |
| 7       | HP1430 | JHP1323 |                | conserved hypothetical ATP-binding protein                                                        | Conserve Hypothetical            |
| 1       | HP1431 | JHP1322 | ksgA           | 16S rRNA(adenosine-N6,N6)-dimethyltransferase , DIMETHYLADENOSINE TRANSFERASE                     | Protein Synthesis and Processing |
| 4       | HP1432 | JHP1321 |                | histidine and glutamine-rich protein, putative histidine and glutamine-rich metal-binding protein | Transporters                     |
| 8       | HP1433 | JHP1326 |                |                                                                                                   | Unknown Hypothetical             |
| 5       | HP1434 | JHP1327 | purU           | formyltetrahydrofolate hydrolase                                                                  | Biosynthesis and Metabolism      |
| 6       | HP1435 | JHP1328 | PspA, sppA     | protease IV , putative PROTEASE IV                                                                | Protein Synthesis and Processing |

| Tn Hits | TIGR#  | ASTRA#  | Gene Name           | Gene Description                                                                                              | Process                             |
|---------|--------|---------|---------------------|---------------------------------------------------------------------------------------------------------------|-------------------------------------|
| 0       | HP1436 | JHP1329 |                     |                                                                                                               | Unknown Hypothetical                |
| 2       | HP1437 | JHP1330 |                     |                                                                                                               | Unknown Hypothetical                |
| 0       | HP1439 | JHP1332 |                     |                                                                                                               | Unknown Hypothetical                |
| 6       | HP1440 | JHP1333 |                     |                                                                                                               | Unknown Hypothetical                |
| 6       | HP1441 | JHP1334 | ppi,<br>ppiA        | peptidyl-prolyl cis-trans isomerase B,<br>cyclosporin-type rotamase , PEPTIDYL-<br>PROLYL CIS-TRANS ISOMERASE | Protein Synthesis and<br>Processing |
| 0       | HP1442 | JHP1335 | csrA                | carbon storage regulator , putative carbon<br>storage regulator                                               | Regulation                          |
| 2       | HP1443 | JHP1336 |                     | conserved hypothetical protein                                                                                | Conserve Hypothetical               |
| 8       | HP1444 | JHP1337 | smpB                | small protein                                                                                                 | Other                               |
| 0       | HP1445 | JHP1338 | exbB,<br>exbB_<br>3 | biopolymer transport protein                                                                                  | Transporters                        |
| 0       | HP1446 | JHP1339 | exbD,<br>exbD_<br>3 | biopolymer transport protein                                                                                  | Transporters                        |
| 0       | HP1447 | JHP1340 | rpl34,<br>rpmH      | ribosomal protein L34 , 50S RIBOSOMAL<br>PROTEIN L34                                                          | Protein Synthesis and<br>Processing |
| 0       | HP1448 | JHP1341 | rnpA                | ribonuclease P, protein component ,<br>putative RIBONUCLEASE P PROTEIN<br>COMPONENT                           | Protein Synthesis and<br>Processing |
| 0       | HP1449 | JHP1342 |                     | conserved hypothetical protein                                                                                | Conserve Hypothetical               |
| 0       | HP1450 | JHP1343 |                     | 60 kDa inner-membrane protein, putative<br>Inner membrane protein                                             | Outer Membrane<br>Protein           |
| 0       | HP1451 | JHP1344 |                     |                                                                                                               | Unknown Hypothetical                |
| 1       | HP1452 | JHP1345 | tdhF,<br>thdF       | thiophene and furan oxidizer , putative<br>thiophene/furan oxidation protein                                  | Detoxification                      |
| 7       | HP1453 | JHP1346 |                     | conserved hypothetical protein, putative<br>Outer membrane protein                                            | Conserve Hypothetical               |
| 8       | HP1454 | JHP1347 |                     |                                                                                                               | Unknown Hypothetical                |
| 6       | HP1455 | JHP1348 |                     |                                                                                                               | Unknown Hypothetical                |
| 0       | HP1456 | JHP1349 | lpp20               | membrane-associated lipoprotein ,<br>conserved lipoprotein                                                    | Cell Envelope                       |
| 4       | HP1457 | JHP1350 |                     |                                                                                                               | Unknown Hypothetical                |
| 10      | HP1458 | JHP1351 |                     | thioredoxin, putative THIOREDOXIN                                                                             | Biosynthesis and<br>Metabolism      |
| 7       | HP1459 | JHP1352 |                     | conserved hypothetical protein                                                                                | Conserve Hypothetical               |
| 7       | HP1460 | JHP1353 | dnaE                | DNA polymerase III alpha-subunit , DNA<br>POLYMERASE III, ALPHA CHAIN                                         | DNA/RNA Synthesis<br>and Processing |
| 2       | HP1461 | JHP1354 |                     | cytochrome c551 peroxidase, putative<br>CYTOCHROME C PEROXIDASE                                               | Biosynthesis and<br>Metabolism      |
| 2       | HP1462 | JHP1355 |                     | secreted protein involved in flagellar<br>motility, putative motility protein                                 | Motility                            |
| 4       | HP1463 | JHP1356 |                     |                                                                                                               | Unknown Hypothetical                |
| 7       | HP1464 | JHP1357 |                     | conserved hypothetical secreted protein                                                                       | Conserve Hypothetical               |
| 2       | HP1465 | JHP1358 | HI108<br>7          | ABC transporter, ATP-binding protein ,<br>putative amino acid abc transporter, ATP-<br>binding protein        | Transporters                        |

| Tn Hits | TIGR#  | ASTRA#  | Gene Name   | Gene Description                                                                        | Process                          |
|---------|--------|---------|-------------|-----------------------------------------------------------------------------------------|----------------------------------|
| 11      | HP1466 | JHP1359 |             | conserved hypothetical integral membrane protein                                        | Conserve Hypothetical            |
| 3       | HP1467 | JHP1360 |             | putative Outer membrane protein                                                         | Outer Membrane Protein           |
| 3       | HP1468 | JHP1361 | ilvE        | branched-chain-amino-acid aminotransferase , BRANCHED-CHAIN AMINO ACID AMINOTRANSFERASE | Biosynthesis and Metabolism      |
| 5       | HP1469 | JHP1362 | omp31       | outer membrane protein , putative Outer membrane protein                                | Outer Membrane Protein           |
| 7       | HP1470 | JHP1363 | polA        | DNA polymerase I                                                                        | DNA/RNA Synthesis and Processing |
| 2       | HP1471 | JHP1364 | BCGIB       | type IIS restriction enzyme R protein , putative TYPE II RESTRICTION ENZYME             | Restriction Modification         |
| 0       | HP1473 | JHP1366 |             |                                                                                         | Unknown Hypothetical             |
| 4       | HP1474 | JHP1367 | tmk         | thymidylate kinase                                                                      | Biosynthesis and Metabolism      |
| 4       | HP1475 | JHP1368 | kdtB        | lipopolysaccharide core biosynthesis protein                                            | Cell Envelope                    |
| 4       | HP1476 | JHP1369 | ubiD        | phenylacrylic acid decarboxylase, OCTAPRENYL-4-HYDROXYBENZOATE CARBOXY-LYASE            | Protein Synthesis and Processing |
| 1       | HP1477 | JHP1370 |             |                                                                                         | Unknown Hypothetical             |
| 0       | HP1478 | JHP1371 | uvrD, rep   | DNA helicase II , putative ATP-DEPENDENT DNA HELICASE                                   | DNA/RNA Synthesis and Processing |
| 19      | HP1479 | JHP1372 |             |                                                                                         | Unknown Hypothetical             |
| 0       | HP1480 | JHP1373 | serS        | seryl-tRNA synthetase                                                                   | Protein Synthesis and Processing |
| 0       | HP1481 | JHP1374 |             |                                                                                         | Unknown Hypothetical             |
| 0       | HP1482 | JHP1375 |             |                                                                                         | Unknown Hypothetical             |
| 0       | HP1483 | JHP1376 | gerC2, ubiE | gerC2 protein , UBIQUINONE/MENAQUINONE BIOSYNTHESIS METHLYTRANSFERASE                   | Other                            |
| 0       | HP1484 | JHP1377 |             | conserved hypothetical integral membrane protein                                        | Conserve Hypothetical            |
| 5       | HP1485 | JHP1378 |             | conserved hypothetical protein                                                          | Conserve Hypothetical            |
| 5       | HP1486 | JHP1379 |             | conserved hypothetical integral membrane protein                                        | Conserve Hypothetical            |
| 1       | HP1487 | JHP1380 |             | conserved hypothetical integral membrane protein                                        | Conserve Hypothetical            |
| 1       | HP1488 | JHP1381 |             | conserved hypothetical secreted protein                                                 | Conserve Hypothetical            |
| 5       | HP1489 | JHP1382 |             | lipase-like protein                                                                     | Unknown Hypothetical             |
| 2       | HP1490 | JHP1383 |             | conserved hypothetical protein                                                          | Conserve Hypothetical            |
| 4       | HP1491 | JHP1384 |             | phosphate permease, putative PHOSPHATE PERMEASE                                         | Transporters                     |
| 3       | HP1492 | JHP1385 |             | conserved hypothetical nifU-like protein                                                | Conserve Hypothetical            |
| 0       | HP1493 | JHP1386 |             |                                                                                         | Conserved Hypothetical           |

| Tn Hits | TIGR#  | ASTRA#  | Gene Name    | Gene Description                                                                                  | Process                          |
|---------|--------|---------|--------------|---------------------------------------------------------------------------------------------------|----------------------------------|
| 2       | HP1494 | JHP1387 | murE         | UDP-MurNac-tripeptide synthetase , UDP-N-ACETYLMURAMYL-TRIPETIDE SYNTHETASE                       | Cell Envelope                    |
| 6       | HP1495 | JHP1388 | tal          | transaldolase                                                                                     | Biosynthesis and Metabolism      |
| 1       | HP1496 | JHP1389 | ctc, rplY    | general stress protein , putative ribosomal protein L25                                           | Other                            |
| 0       | HP1497 | JHP1390 | pth          | peptidyl-tRNA hydrolase                                                                           | Protein Synthesis and Processing |
| 7       | HP1498 | JHP1391 |              |                                                                                                   | Unknown Hypothetical             |
| 2       | HP1500 | JHP1393 |              |                                                                                                   | Unknown Hypothetical             |
| 10      | HP1501 | JHP1394 | omp32        | outer membrane protein , putative Outer membrane protein                                          | Outer Membrane Protein           |
| 3       | HP1502 | JHP1395 |              |                                                                                                   | Unknown Hypothetical             |
| 4       | HP1503 | JHP1396 | copA, fixI   | cation-transporting ATPase, P-type , putative component of cation transport for cbb3-type oxidase | Transporters                     |
| 0       | HP1504 | JHP1397 |              | conserved hypothetical protein                                                                    | Conserve Hypothetical            |
| 1       | HP1505 | JHP1398 | ribG, ribD   | riboflavin biosynthesis protein , putative RIBOFLAVIN-SPECIFIC DEAMINASE                          | Biosynthesis and Metabolism      |
| 7       | HP1506 | JHP1399 | gltS         | glutamate permease , Sodium/Glutamate Symporter                                                   | Transporters                     |
| 3       | HP1507 | JHP1400 |              | conserved hypothetical ATP-binding protein                                                        | Conserve Hypothetical            |
| 2       | HP1509 | JHP1402 |              | conserved hypothetical integral membrane protein                                                  | Conserve Hypothetical            |
| 0       | HP1510 | JHP1403 | folB         | conserved hypothetical protein, DIHYDRONEOPTERIN ALDOLASE                                         | Conserve Hypothetical            |
| 1       | HP1511 | JHP1404 |              |                                                                                                   | Unknown Hypothetical             |
| 5       | HP1512 | JHP1405 | frpB, frpB_3 | iron-regulated outer membrane protein , putative IRON-REGULATED OUTER MEMBRANE PROTEIN            | Transporters                     |
| 1       | HP1513 | JHP1406 | selA         | selenocysteine synthase SelA, putative, L-SERYL-TRNA(SER) SELENIUM TRANSFERASE                    | Protein Synthesis and Processing |
| 0       | HP1514 | JHP1407 | nusA         | transcription termination factor NusA , N-UTILIZATION SUBSTANCE PROTEIN A                         | DNA/RNA Synthesis and Processing |
| 0       | HP1518 | N/A     |              |                                                                                                   | Unknown Hypothetical             |
| 11      | HP1521 | JHP1410 | res, res_2   | type III restriction enzyme R protein , TYPE III RESTRICTION ENZYME                               | Restiction Modification          |
| 0       | HP1522 | JHP1411 | mod_2        | TYPE III DNA MODIFICATION ENZYME (METHYLTRANSFERASE)                                              | Restiction Modification          |
| 0       | HP1523 | JHP1412 | recG         | DNA recombinase , ATP-DEPENDENT DNA HELICASE                                                      | DNA/RNA Synthesis and Processing |
| 0       | HP1524 | JHP1413 |              |                                                                                                   | Unknown Hypothetical             |
| 5       | HP1525 | JHP1414 |              |                                                                                                   | Unknown Hypothetical             |
| 2       | HP1526 | JHP1415 | lexA, exoA   | exodeoxyribonuclease                                                                              | DNA/RNA Synthesis and Processing |
| 7       | HP1527 | JHP1416 |              |                                                                                                   | Unknown Hypothetical             |
| 1       | HP1528 | N/A     |              |                                                                                                   | Unknown Hypothetical             |

| Tn Hits | TIGR#  | ASTRA#  | Gene Name  | Gene Description                                                                                                     | Process                          |
|---------|--------|---------|------------|----------------------------------------------------------------------------------------------------------------------|----------------------------------|
| 1       | HP1529 | JHP1417 | dnaA       | chromosomal replication initiator protein                                                                            | DNA/RNA Synthesis and Processing |
| 1       | HP1530 | JHP1418 | punB       | purine nucleoside phosphorylase                                                                                      | Biosynthesis and Metabolism      |
| 0       | HP1531 | JHP1419 |            |                                                                                                                      | Unknown Hypothetical             |
| 15      | HP1532 | JHP1420 | glmS       | glucosamine fructose-6-phosphate aminotransferase (isomerizing) , glutamine fructose-6-phosphate aminotransferase    | Biosynthesis and Metabolism      |
| 3       | HP1533 | JHP1421 |            | conserved hypothetical protein                                                                                       | Conserve Hypothetical            |
| 11      | HP1534 | N/A     | tnpB       | IS605 transposase                                                                                                    | Transposon                       |
| 9       | HP1535 | N/A     | tnpA       | IS605 transposase                                                                                                    | Transposon                       |
| 0       | HP1536 | N/A     |            |                                                                                                                      | Unknown Hypothetical             |
| 1       | HP1537 | N/A     |            |                                                                                                                      | Unknown Hypothetical             |
| 1       | HP1538 | JHP1461 | petC       | Ubiquinol cytochrome c oxidoreductase, cytochrome c1 subunit                                                         | Biosynthesis and Metabolism      |
| 0       | HP1539 | JHP1460 | fbcH, petB | ubiquinol cytochrome c oxidoreductase, cytochrome b subunit                                                          | Biosynthesis and Metabolism      |
| 1       | HP1540 | JHP1459 | fbcF, petA | ubiquinol cytochrome c oxidoreductase, Rieske 2Fe-2S subunit , Ubiquinol cytochrome c oxidoreductase, 2Fe-2S subunit | Biosynthesis and Metabolism      |
| 9       | HP1541 | JHP1458 | trcF, mfd  | transcription-repair coupling factor                                                                                 | DNA/RNA Synthesis and Processing |
| 3       | HP1542 | JHP1457 |            |                                                                                                                      | Unknown Hypothetical             |
| 3       | HP1543 | JHP1456 | tagE       | toxR-activated gene                                                                                                  | Cell Envelope                    |
| 6       | HP1544 | JHP1455 | tagE       | toxR-activated gene                                                                                                  | Cell Envelope                    |
| 1       | HP1545 | JHP1454 | folC       | folypolyglutamate synthase                                                                                           | Biosynthesis and Metabolism      |
| 0       | HP1546 | JHP1453 |            |                                                                                                                      | Unknown Hypothetical             |
| 1       | HP1547 | JHP1452 | leuS       | leucyl-tRNA synthetase                                                                                               | Protein Synthesis and Processing |
| 0       | HP1548 | JHP1451 |            | conserved hypothetical integral membrane protein                                                                     | Conserve Hypothetical            |
| 9       | HP1549 | JHP1450 | secF       | protein-export membrane protein                                                                                      | Protein Synthesis and Processing |
| 2       | HP1550 | JHP1449 | secD       | protein-export membrane protein                                                                                      | Protein Synthesis and Processing |
| 0       | HP1551 | JHP1448 |            | conserved hypothetical secreted protein                                                                              | Conserve Hypothetical            |
| 0       | HP1552 | JHP1447 | nhaA       | Na <sup>+</sup> /H <sup>+</sup> antiporter , NA(+)/H(+)<br>ANTIPORTER 1                                              | Transporters                     |
| 0       | HP1553 | JHP1446 | pcrA       | helicase, putative ATP-DEPENDENT<br>HELICASE                                                                         | DNA/RNA Synthesis and Processing |
| 0       | HP1554 | JHP1445 | rps2, rpsB | ribosomal protein S2 , 30S RIBOSOMAL<br>PROTEIN S2                                                                   | Protein Synthesis and Processing |
| 1       | HP1555 | JHP1444 | tsf, tfs   | translation elongation factor EF-Ts ,<br>ELONGATION FACTOR TS (EF-TS)                                                | Protein Synthesis and Processing |
| 1       | HP1556 | JHP1464 | ftsI       | cell division protein , PENICILLIN-BINDING<br>PROTEIN                                                                | Cell Division                    |

| Tn Hits | TIGR#  | ASTRA#  | Gene Name    | Gene Description                                                                                       | Process                     |
|---------|--------|---------|--------------|--------------------------------------------------------------------------------------------------------|-----------------------------|
| 0       | HP1557 | JHP1465 | fliE         | flagellar basal-body protein , FLAGELLAR HOOK-BASAL BODY COMPLEX PROTEIN                               | Motility                    |
| 6       | HP1558 | JHP1466 | flgC         | flagellar basal-body rod protein (proximal rod protein), FLAGELLAR BASAL-BODY ROD PROTEIN              | Motility                    |
| 1       | HP1559 | JHP1467 | flgB         | flagellar basal-body rod protein (proximal rod protein), FLAGELLAR BASAL-BODY ROD PROTEIN              | Motility                    |
| 8       | HP1560 | JHP1468 | ftsW, rodA_2 | cell division protein , putative ROD SHAPE-DETERMINING PROTEIN                                         | Cell Division               |
| 4       | HP1562 | JHP1470 | ceuE         | iron (III) ABC transporter, periplasmic iron-binding protein                                           | Transporters                |
| 8       | HP1563 | JHP1471 | tsaA         | alkyl hydroperoxide reductase , putative peroxidase                                                    | Detoxification              |
| 8       | HP1564 | JHP1472 |              | outer membrane protein, putative Outer membrane protein                                                | Outer Membrane Protein      |
| 8       | HP1565 | JHP1473 | pbp2         | penicillin-binding protein 2 , PENICILLIN-BINDING PROTEIN                                              | Cell Envelope               |
| 0       | HP1566 | JHP1474 |              |                                                                                                        | Unknown Hypothetical        |
| 0       | HP1567 | JHP1475 |              | conserved hypothetical GTP-binding protein                                                             | Conserve Hypothetical       |
| 4       | HP1568 | JHP1476 |              |                                                                                                        | Unknown Hypothetical        |
| 0       | HP1569 | JHP1477 |              |                                                                                                        | Unknown Hypothetical        |
| 0       | HP1570 | JHP1478 |              | conserved hypothetical protein                                                                         | Conserve Hypothetical       |
| 0       | HP1571 | JHP1479 | rlpA         | rare lipoprotein A , putative Outer membrane protein                                                   | Cell Envelope               |
| 2       | HP1572 | JHP1480 | dniR         | regulatory protein DniR, putative REGULATORY PROTEIN                                                   | Regulation                  |
| 1       | HP1573 | JHP1481 |              | conserved hypothetical protein                                                                         | Conserve Hypothetical       |
| 8       | HP1574 | JHP1482 | ribC         | riboflavin synthase alpha subunit , RIBOFLAVIN SYNTHASE ALPHA CHAIN                                    | Biosynthesis and Metabolism |
| 5       | HP1575 | JHP1483 | flhB_2       | ABC transporter, putative, putative FLAGELLAR BIOSYNTHESIS PROTEIN                                     | Transporters                |
| 4       | HP1576 | JHP1484 | abc          | ABC transporter, ATP-binding protein                                                                   | Transporters                |
| 2       | HP1577 | JHP1485 | yaeE         | ABC transporter, permease protein , ABC transporter, permease                                          | Transporters                |
| 1       | HP1578 | N/A     |              | LPS biosynthesis protein                                                                               | Cell Envelope               |
| 1       | HP1579 | JHP1486 |              |                                                                                                        | Unknown Hypothetical        |
| 0       | HP1580 | JHP1487 |              |                                                                                                        | Unknown Hypothetical        |
| 7       | HP1581 | JHP1488 | llm, wecA    | methicillin resistance protein , putative UNDECAPRENYL-PHOSPHATE-ALPHA-N-ACETYLGLUCOSAMINYLTRANSFERASE | Cell Envelope               |
| 6       | HP1582 | JHP1489 | pdxJ         | pyridoxal phosphate biosynthetic protein J , PYRIDOXAL PHOSPHATE SYNTHETASE                            | Biosynthesis and Metabolism |

| Tn Hits | TIGR#  | ASTRA#  | Gene Name    | Gene Description                                                                         | Process                          |
|---------|--------|---------|--------------|------------------------------------------------------------------------------------------|----------------------------------|
| 6       | HP1583 | JHP1490 | pdxA         | pyridoxal phosphate biosynthetic protein A                                               | Biosynthesis and Metabolism      |
| 9       | HP1584 | JHP1491 | gcp, ydiE    | sialoglycoprotease , putative O-SIALOGLYCOPROTEIN ENDOPEPTIDASE                          | Protein Synthesis and Processing |
| 6       | HP1585 | JHP1492 | flgG, flgG_2 | flagellar basal-body rod protein , FLAGELLAR BASAL-BODY ROD PROTEIN (DISTAL ROD PROTEIN) | Motility                         |
| 1       | HP1586 | N/A     |              |                                                                                          | Unknown Hypothetical             |
| 2       | HP1587 | JHP1493 |              | conserved hypothetical protein                                                           | Conserve Hypothetical            |
| 2       | HP1588 | JHP1494 |              | conserved hypothetical protein                                                           | Conserve Hypothetical            |
| 5       | HP1589 | N/A     |              |                                                                                          | Conserve Hypothetical            |
| 7       | HP1590 | N/A     |              |                                                                                          | Unknown Hypothetical             |
| 10      | N/A    | JHP0044 |              | putative TYPE II DNA MODIFICATION ENZYME (METHYLTRANSFERASE)                             | Restriction Modification         |
| 0       | N/A    | JHP0332 |              |                                                                                          | Unknown Hypothetical             |
| 1       | N/A    | JHP0585 |              | putative 3-HYDROXYACID DEHYDROGENASE                                                     | Conserved Hypothetical           |
| 12      | N/A    | JHP0587 |              |                                                                                          | Unknown Hypothetical             |
| 1       | N/A    | JHP0755 |              |                                                                                          | Unknown Hypothetical             |
| 1       | N/A    | JHP0756 |              | putative TYPE II DNA MODIFICATION ENZYME (METHYLTRANSFERASE)                             | Restriction Modification         |
| 1       | N/A    | JHP0825 |              |                                                                                          | Unknown Hypothetical             |
| 0       | N/A    | JHP0828 |              |                                                                                          | Unknown Hypothetical             |
| 1       | N/A    | JHP0829 |              |                                                                                          | Unknown Hypothetical             |
| 0       | N/A    | JHP0830 |              |                                                                                          | Unknown Hypothetical             |
| 0       | N/A    | JHP0834 |              |                                                                                          | Unknown Hypothetical             |
| 6       | N/A    | JHP0917 | virB4_2      | DNA transfer protein                                                                     | Conserved Hypothetical           |
| 2       | N/A    | JHP0918 | virB4_3      | DNA transfer protein                                                                     | Conserved Hypothetical           |
| 1       | N/A    | JHP0919 | topA_2       | topoisomerase I                                                                          | Conserved Hypothetical           |
| 3       | N/A    | JHP0920 |              |                                                                                          | Unknown Hypothetical             |
| 2       | N/A    | JHP0921 |              |                                                                                          | Unknown Hypothetical             |
| 2       | N/A    | JHP0922 |              |                                                                                          | Unknown Hypothetical             |
| 1       | N/A    | JHP0923 |              |                                                                                          | Unknown Hypothetical             |
| 1       | N/A    | JHP0924 |              |                                                                                          | Unknown Hypothetical             |
| 5       | N/A    | JHP0927 |              |                                                                                          | Unknown Hypothetical             |
| 7       | N/A    | JHP0928 |              |                                                                                          | Unknown Hypothetical             |
| 0       | N/A    | JHP0929 |              |                                                                                          | Unknown Hypothetical             |
| 3       | N/A    | JHP0945 |              |                                                                                          | Unknown Hypothetical             |
| 1       | N/A    | JHP0946 |              |                                                                                          | Unknown Hypothetical             |
| 1       | N/A    | JHP0954 |              |                                                                                          | Unknown Hypothetical             |
| 2       | N/A    | JHP0955 |              |                                                                                          | Unknown Hypothetical             |
| 1       | N/A    | JHP0956 |              |                                                                                          | Unknown Hypothetical             |
| 1       | N/A    | JHP0957 |              |                                                                                          | Unknown Hypothetical             |
| 2       | N/A    | JHP0958 |              |                                                                                          | Unknown Hypothetical             |
| 1       | N/A    | JHP0959 |              |                                                                                          | Unknown Hypothetical             |
| 0       | N/A    | JHP0960 |              |                                                                                          | Unknown Hypothetical             |



| Tn Hits | TIGR# | ASTRA#  | Gene Name | Gene Description                                              | Process                  |
|---------|-------|---------|-----------|---------------------------------------------------------------|--------------------------|
| 0       | N/A   | JHP1032 |           | putative lipopolysaccharide biosynthesis protein              | Conserved Hypothetical   |
| 1       | N/A   | JHP1132 |           |                                                               | Unknown Hypothetical     |
| 9       | N/A   | JHP1296 | mod_1     | putative TYPE III DNA MODIFICATION ENZYME (METHYLTRANSFERASE) | Restriction Modification |
| 9       | N/A   | JHP1297 | res_1     | putative TYPE III RESTRICTION ENZYME                          | Restriction Modification |
| 5       | N/A   | JHP1306 |           |                                                               | Unknown Hypothetical     |
| 5       | N/A   | JHP1437 |           |                                                               | Unknown Hypothetical     |
| 0       | N/A   | JHP1495 |           |                                                               | Unknown Hypothetical     |
